# Supplementary material for: A deep learning framework for accurate reaction prediction and its application on high-throughput experimentation data
Source: J Cheminform. 2023 Aug 11;15:72. doi: 10.1186/s13321-023-00732-w (PMC10422736; doi:10.1186/s13321-023-00732-w)
Supplement: Supplementary file 1 — Additional file 1. The table of Dataset 4. It consists of 1558 in-house data points about Buchwald-Hartwig coupling reaction. [file 13321_2023_732_MOESM1_ESM.xlsx]

## Sheet: Sheet1
Output	Bromide	Bromide_Num	Amine	Amine_Num	Product
0.34708	CC1=CC=C(Br)C=C1	B01	NC1=CC=CC=C1C	A01	N(c1c(C)cccc1)c1ccc(C)cc1
0.0909039	OC1=CC=CC=C1Br	B02	NC1=CC=CC=C1C	A01	Oc1c(Nc2c(C)cccc2)cccc1
0.354723	FC1=CC=CC=C1Br	B03	NC1=CC=CC=C1C	A01	Fc1c(Nc2c(C)cccc2)cccc1
0.0954863	N#CC1=CC=C(Br)C=C1	B04	NC1=CC=CC=C1C	A01	N#Cc1ccc(Nc2c(C)cccc2)cc1
0.344712	FC1=CC(Br)=CC=C1	B05	NC1=CC=CC=C1C	A01	Fc1cc(Nc2c(C)cccc2)ccc1
0.327152	CC1=CC=C(Br)C=C1C	B06	NC1=CC=CC=C1C	A01	N(c1c(C)cccc1)c1cc(C)c(C)cc1
0.485399	COC1=CC(Br)=CC=C1	B07	NC1=CC=CC=C1C	A01	O(C)c1cc(Nc2c(C)cccc2)ccc1
0.213546	OCC1=CC=CC(Br)=C1	B08	NC1=CC=CC=C1C	A01	OCc1cc(Nc2c(C)cccc2)ccc1
0.215545	CC1=CC=C(Br)C=C1	B01	NC1=CC=CC(C)=C1	A02	N(c1cc(C)ccc1)c1ccc(C)cc1
0.0773559	OC1=CC=CC=C1Br	B02	NC1=CC=CC(C)=C1	A02	Oc1c(Nc2cc(C)ccc2)cccc1
0.305101	FC1=CC=CC=C1Br	B03	NC1=CC=CC(C)=C1	A02	Fc1c(Nc2cc(C)ccc2)cccc1
0.0594357	N#CC1=CC=C(Br)C=C1	B04	NC1=CC=CC(C)=C1	A02	N#Cc1ccc(Nc2cc(C)ccc2)cc1
0.231897	FC1=CC(Br)=CC=C1	B05	NC1=CC=CC(C)=C1	A02	Fc1cc(Nc2cc(C)ccc2)ccc1
0.288008	COC1=CC(Br)=CC=C1	B07	NC1=CC=CC(C)=C1	A02	O(C)c1cc(Nc2cc(C)ccc2)ccc1
0.22612	OCC1=CC=CC(Br)=C1	B08	NC1=CC=CC(C)=C1	A02	OCc1cc(Nc2cc(C)ccc2)ccc1
0.0710077	OC1=CC=CC=C1Br	B02	NC1=CC=C(C)C=C1	A03	Oc1c(Nc2ccc(C)cc2)cccc1
0.355512	FC1=CC=CC=C1Br	B03	NC1=CC=C(C)C=C1	A03	Fc1c(Nc2ccc(C)cc2)cccc1
0.0864993	N#CC1=CC=C(Br)C=C1	B04	NC1=CC=C(C)C=C1	A03	N#Cc1ccc(Nc2ccc(C)cc2)cc1
0.336748	FC1=CC(Br)=CC=C1	B05	NC1=CC=C(C)C=C1	A03	Fc1cc(Nc2ccc(C)cc2)ccc1
0.276462	CC1=CC=C(Br)C=C1C	B06	NC1=CC=C(C)C=C1	A03	N(c1cc(C)c(C)cc1)c1ccc(C)cc1
0.461221	COC1=CC(Br)=CC=C1	B07	NC1=CC=C(C)C=C1	A03	O(C)c1cc(Nc2ccc(C)cc2)ccc1
0.215133	OCC1=CC=CC(Br)=C1	B08	NC1=CC=C(C)C=C1	A03	OCc1cc(Nc2ccc(C)cc2)ccc1
0.0770113	CC1=CC=C(Br)C=C1	B01	OC1=CC=CC=C1N	A04	Oc1c(Nc2ccc(C)cc2)cccc1
0.075924	OC1=CC=CC=C1Br	B02	OC1=CC=CC=C1N	A04	Oc1c(Nc2c(O)cccc2)cccc1
0.0107624	FC1=CC=CC=C1Br	B03	OC1=CC=CC=C1N	A04	Fc1c(Nc2c(O)cccc2)cccc1
0.0708906	N#CC1=CC=C(Br)C=C1	B04	OC1=CC=CC=C1N	A04	Oc1c(Nc2ccc(C#N)cc2)cccc1
0.348729	CC1=CC=C(Br)C=C1	B01	NC1=CC=CC=C1F	A05	Fc1c(Nc2ccc(C)cc2)cccc1
0.455852	FC1=CC=CC=C1Br	B03	NC1=CC=CC=C1F	A05	Fc1c(Nc2c(F)cccc2)cccc1
0.0945159	N#CC1=CC=C(Br)C=C1	B04	NC1=CC=CC=C1F	A05	Fc1c(Nc2ccc(C#N)cc2)cccc1
0.352357	FC1=CC(Br)=CC=C1	B05	NC1=CC=CC=C1F	A05	Fc1c(Nc2cc(F)ccc2)cccc1
0.526332	CC1=CC=C(Br)C=C1C	B06	NC1=CC=CC=C1F	A05	Fc1c(Nc2cc(C)c(C)cc2)cccc1
0.432786	COC1=CC(Br)=CC=C1	B07	NC1=CC=CC=C1F	A05	Fc1c(Nc2cc(OC)ccc2)cccc1
0.0106445	OC1=CC=CC=C1Br	B02	FC1=CC(N)=CC=C1	A06	Fc1cc(Nc2c(O)cccc2)ccc1
0.320511	FC1=CC=CC=C1Br	B03	FC1=CC(N)=CC=C1	A06	Fc1c(Nc2cc(F)ccc2)cccc1
0.221417	FC1=CC(Br)=CC=C1	B05	FC1=CC(N)=CC=C1	A06	Fc1cc(Nc2cc(F)ccc2)ccc1
0.250755	CC1=CC=C(Br)C=C1C	B06	FC1=CC(N)=CC=C1	A06	Fc1cc(Nc2cc(C)c(C)cc2)ccc1
0.633009	COC1=CC(Br)=CC=C1	B07	FC1=CC(N)=CC=C1	A06	Fc1cc(Nc2cc(OC)ccc2)ccc1
0.191153	OCC1=CC=CC(Br)=C1	B08	FC1=CC(N)=CC=C1	A06	Fc1cc(Nc2cc(CO)ccc2)ccc1
0.297596	CC1=CC=C(Br)C=C1	B01	NC1=CC=C(F)C=C1	A07	Fc1ccc(Nc2ccc(C)cc2)cc1
0.360779	FC1=CC=CC=C1Br	B03	NC1=CC=C(F)C=C1	A07	Fc1c(Nc2ccc(F)cc2)cccc1
0.0615621	N#CC1=CC=C(Br)C=C1	B04	NC1=CC=C(F)C=C1	A07	Fc1ccc(Nc2ccc(C#N)cc2)cc1
0.287559	FC1=CC(Br)=CC=C1	B05	NC1=CC=C(F)C=C1	A07	Fc1cc(Nc2ccc(F)cc2)ccc1
0.24792	CC1=CC=C(Br)C=C1C	B06	NC1=CC=C(F)C=C1	A07	Fc1ccc(Nc2cc(C)c(C)cc2)cc1
0.332384	COC1=CC(Br)=CC=C1	B07	NC1=CC=C(F)C=C1	A07	Fc1ccc(Nc2cc(OC)ccc2)cc1
0.236789	OCC1=CC=CC(Br)=C1	B08	NC1=CC=C(F)C=C1	A07	Fc1ccc(Nc2cc(CO)ccc2)cc1
0.033245	CC1=CC=C(Br)C=C1	B01	NC1=CC=CC=C1C#C	A08	N(c1c(C#C)cccc1)c1ccc(C)cc1
0.215956	OC1=CC=CC=C1Br	B02	NC1=CC=CC=C1C#C	A08	Oc1c(Nc2c(C#C)cccc2)cccc1
0.196465	FC1=CC=CC=C1Br	B03	NC1=CC=CC=C1C#C	A08	Fc1c(Nc2c(C#C)cccc2)cccc1
0.106125	FC1=CC(Br)=CC=C1	B05	NC1=CC=CC=C1C#C	A08	Fc1cc(Nc2c(C#C)cccc2)ccc1
0.015577	CC1=CC=C(Br)C=C1C	B06	NC1=CC=CC=C1C#C	A08	N(c1c(C#C)cccc1)c1cc(C)c(C)cc1
0.183415	COC1=CC(Br)=CC=C1	B07	NC1=CC=CC=C1C#C	A08	O(C)c1cc(Nc2c(C#C)cccc2)ccc1
0.0465918	OCC1=CC=CC(Br)=C1	B08	NC1=CC=CC=C1C#C	A08	OCc1cc(Nc2c(C#C)cccc2)ccc1
0.062436	FC1=CC=CC=C1Br	B03	C#CC1=CC=CC(N)=C1	A09	Fc1c(Nc2cc(C#C)ccc2)cccc1
0.0490433	N#CC1=CC=C(Br)C=C1	B04	C#CC1=CC=CC(N)=C1	A09	N#Cc1ccc(Nc2cc(C#C)ccc2)cc1
0.0371523	OC1=CC=CC=C1Br	B02	N#Cc1ccc(N)cc1	A10	Oc1c(Nc2ccc(C#N)cc2)cccc1
0.1157	FC1=CC=CC=C1Br	B03	N#Cc1ccc(N)cc1	A10	Fc1c(Nc2ccc(C#N)cc2)cccc1
0.0932861	CC1=CC=C(Br)C=C1C	B06	N#Cc1ccc(N)cc1	A10	N#Cc1ccc(Nc2cc(C)c(C)cc2)cc1
0.129709	COC1=CC(Br)=CC=C1	B07	N#Cc1ccc(N)cc1	A10	O(C)c1cc(Nc2ccc(C#N)cc2)ccc1
0.0762985	OCC1=CC=CC(Br)=C1	B08	N#Cc1ccc(N)cc1	A10	OCc1cc(Nc2ccc(C#N)cc2)ccc1
0.0307915	CC1=CC=C(Br)C=C1	B01	NC1=C(C)C=CC=C1C	A11	N(c1c(C)cccc1C)c1ccc(C)cc1
0.0249557	FC1=CC=CC=C1Br	B03	NC1=C(C)C=CC=C1C	A11	Fc1c(Nc2c(C)cccc2C)cccc1
0.0214569	N#CC1=CC=C(Br)C=C1	B04	NC1=C(C)C=CC=C1C	A11	N#Cc1ccc(Nc2c(C)cccc2C)cc1
0.0913026	FC1=CC(Br)=CC=C1	B05	NC1=C(C)C=CC=C1C	A11	Fc1cc(Nc2c(C)cccc2C)ccc1
0.052951	CC1=CC=C(Br)C=C1C	B06	NC1=C(C)C=CC=C1C	A11	N(c1c(C)cccc1C)c1cc(C)c(C)cc1
0.0320761	COC1=CC(Br)=CC=C1	B07	NC1=C(C)C=CC=C1C	A11	O(C)c1cc(Nc2c(C)cccc2C)ccc1
0.0462233	OCC1=CC=CC(Br)=C1	B08	NC1=C(C)C=CC=C1C	A11	OCc1cc(Nc2c(C)cccc2C)ccc1
0.322653	CC1=CC=C(Br)C=C1	B01	NC1=CC=C(OC)C=C1	A12	O(C)c1ccc(Nc2ccc(C)cc2)cc1
0.381845	FC1=CC=CC=C1Br	B03	NC1=CC=C(OC)C=C1	A12	Fc1c(Nc2ccc(OC)cc2)cccc1
0.11294	N#CC1=CC=C(Br)C=C1	B04	NC1=CC=C(OC)C=C1	A12	O(C)c1ccc(Nc2ccc(C#N)cc2)cc1
0.346463	FC1=CC(Br)=CC=C1	B05	NC1=CC=C(OC)C=C1	A12	Fc1cc(Nc2ccc(OC)cc2)ccc1
0.241478	CC1=CC=C(Br)C=C1C	B06	NC1=CC=C(OC)C=C1	A12	O(C)c1ccc(Nc2cc(C)c(C)cc2)cc1
0.419034	COC1=CC(Br)=CC=C1	B07	NC1=CC=C(OC)C=C1	A12	O(C)c1cc(Nc2ccc(OC)cc2)ccc1
0.279692	OCC1=CC=CC(Br)=C1	B08	NC1=CC=C(OC)C=C1	A12	O(C)c1ccc(Nc2cc(CO)ccc2)cc1
0.372377	FC1=CC(Br)=CC=C1	B05	NC1=CC=CC=C1OC	A13	Fc1cc(Nc2c(OC)cccc2)ccc1
0.295836	COC1=CC(Br)=CC=C1	B07	NC1=CC=CC=C1OC	A13	O(C)c1c(Nc2cc(OC)ccc2)cccc1
0.331863	OCC1=CC=CC(Br)=C1	B08	NC1=CC=CC=C1OC	A13	O(C)c1c(Nc2cc(CO)ccc2)cccc1
0.775858	CC1=CC=C(Br)C=C1	B01	NC1=CC(C(C)=O)=CC=C1	A15	O=C(C)c1cc(Nc2ccc(C)cc2)ccc1
0.687268	FC1=CC=CC=C1Br	B03	NC1=CC(C(C)=O)=CC=C1	A15	Fc1c(Nc2cc(C(=O)C)ccc2)cccc1
0.300336	N#CC1=CC=C(Br)C=C1	B04	NC1=CC(C(C)=O)=CC=C1	A15	O=C(C)c1cc(Nc2ccc(C#N)cc2)ccc1
0.961203	FC1=CC(Br)=CC=C1	B05	NC1=CC(C(C)=O)=CC=C1	A15	Fc1cc(Nc2cc(C(=O)C)ccc2)ccc1
0.656753	OCC1=CC=CC(Br)=C1	B08	NC1=CC(C(C)=O)=CC=C1	A15	O=C(C)c1cc(Nc2cc(CO)ccc2)ccc1
0.34275	FC1=CC=CC=C1Br	B03	CC(C1=CC=CC=C1N)=O	A16	Fc1c(Nc2c(C(=O)C)cccc2)cccc1
0.377299	FC1=CC(Br)=CC=C1	B05	CC(C1=CC=CC=C1N)=O	A16	Fc1cc(Nc2c(C(=O)C)cccc2)ccc1
0.386836	COC1=CC(Br)=CC=C1	B07	CC(C1=CC=CC=C1N)=O	A16	O=C(C)c1c(Nc2cc(OC)ccc2)cccc1
0.461512	OCC1=CC=CC(Br)=C1	B08	CC(C1=CC=CC=C1N)=O	A16	O=C(C)c1c(Nc2cc(CO)ccc2)cccc1
0.354783	CC1=CC=C(Br)C=C1	B01	CC(C1=CC=C(N)C=C1)=O	A17	O=C(C)c1ccc(Nc2ccc(C)cc2)cc1
0.346193	N#CC1=CC=C(Br)C=C1	B04	CC(C1=CC=C(N)C=C1)=O	A17	O=C(C)c1ccc(Nc2ccc(C#N)cc2)cc1
0.239136	FC1=CC(Br)=CC=C1	B05	CC(C1=CC=C(N)C=C1)=O	A17	Fc1cc(Nc2ccc(C(=O)C)cc2)ccc1
0.280859	CC1=CC=C(Br)C=C1C	B06	CC(C1=CC=C(N)C=C1)=O	A17	O=C(C)c1ccc(Nc2cc(C)c(C)cc2)cc1
0.293332	COC1=CC(Br)=CC=C1	B07	CC(C1=CC=C(N)C=C1)=O	A17	O=C(C)c1ccc(Nc2cc(OC)ccc2)cc1
0.322394	OCC1=CC=CC(Br)=C1	B08	CC(C1=CC=C(N)C=C1)=O	A17	O=C(C)c1ccc(Nc2cc(CO)ccc2)cc1
0.0968167	OC1=CC=CC=C1Br	B02	NC1=CC=C([N+]([O-])=O)C=C1	A18	O=[N+]([O-])c1ccc(Nc2c(O)cccc2)cc1
0.486444	FC1=CC(Br)=CC=C1	B05	NC1=CC=C([N+]([O-])=O)C=C1	A18	Fc1cc(Nc2ccc([N+](=O)[O-])cc2)ccc1
0.488424	CC1=CC=C(Br)C=C1C	B06	NC1=CC=C([N+]([O-])=O)C=C1	A18	O=[N+]([O-])c1ccc(Nc2cc(C)c(C)cc2)cc1
0.65501	COC1=CC(Br)=CC=C1	B07	NC1=CC=C([N+]([O-])=O)C=C1	A18	O=[N+]([O-])c1ccc(Nc2cc(OC)ccc2)cc1
0.455157	OCC1=CC=CC(Br)=C1	B08	NC1=CC=C([N+]([O-])=O)C=C1	A18	O=[N+]([O-])c1ccc(Nc2cc(CO)ccc2)cc1
0.630492	CC1=CC=C(Br)C=C1	B01	N#CC1=CC=CC(OC)=C1N	A19	O(C)c1c(Nc2ccc(C)cc2)c(C#N)ccc1
0.0210217	OC1=CC=CC=C1Br	B02	N#CC1=CC=CC(OC)=C1N	A19	O(C)c1c(Nc2c(O)cccc2)c(C#N)ccc1
0.260896	FC1=CC=CC=C1Br	B03	N#CC1=CC=CC(OC)=C1N	A19	Fc1c(Nc2c(OC)cccc2C#N)cccc1
0.377821	N#CC1=CC=C(Br)C=C1	B04	N#CC1=CC=CC(OC)=C1N	A19	O(C)c1c(Nc2ccc(C#N)cc2)c(C#N)ccc1
0.42091	FC1=CC(Br)=CC=C1	B05	N#CC1=CC=CC(OC)=C1N	A19	Fc1cc(Nc2c(OC)cccc2C#N)ccc1
0.389004	CC1=CC=C(Br)C=C1C	B06	N#CC1=CC=CC(OC)=C1N	A19	O(C)c1c(Nc2cc(C)c(C)cc2)c(C#N)ccc1
0.386002	COC1=CC(Br)=CC=C1	B07	N#CC1=CC=CC(OC)=C1N	A19	O(C)c1c(Nc2cc(OC)ccc2)c(C#N)ccc1
0.599299	OCC1=CC=CC(Br)=C1	B08	N#CC1=CC=CC(OC)=C1N	A19	O(C)c1c(Nc2cc(CO)ccc2)c(C#N)ccc1
0.58338	FC1=CC=CC=C1Br	B03	NC1=CC=C(C(C)(C)C)C=C1	A20	Fc1c(Nc2ccc(C(C)(C)C)cc2)cccc1
0.100323	N#CC1=CC=C(Br)C=C1	B04	NC1=CC=C(C(C)(C)C)C=C1	A20	N#Cc1ccc(Nc2ccc(C(C)(C)C)cc2)cc1
0.272567	FC1=CC(Br)=CC=C1	B05	NC1=CC=C(C(C)(C)C)C=C1	A20	Fc1cc(Nc2ccc(C(C)(C)C)cc2)ccc1
0.274716	CC1=CC=C(Br)C=C1C	B06	NC1=CC=C(C(C)(C)C)C=C1	A20	N(c1cc(C)c(C)cc1)c1ccc(C(C)(C)C)cc1
0.383783	COC1=CC(Br)=CC=C1	B07	NC1=CC=C(C(C)(C)C)C=C1	A20	O(C)c1cc(Nc2ccc(C(C)(C)C)cc2)ccc1
0.232878	OCC1=CC=CC(Br)=C1	B08	NC1=CC=C(C(C)(C)C)C=C1	A20	OCc1cc(Nc2ccc(C(C)(C)C)cc2)ccc1
0.00313227	OC1=CC=CC=C1Br	B02	NC1=CC=CC=C1C(F)(F)F	A21	FC(F)(F)c1c(Nc2c(O)cccc2)cccc1
0.167956	CC1=CC=C(Br)C=C1C	B06	NC1=CC=CC=C1C(F)(F)F	A21	FC(F)(F)c1c(Nc2cc(C)c(C)cc2)cccc1
0.255852	COC1=CC(Br)=CC=C1	B07	NC1=CC=CC=C1C(F)(F)F	A21	FC(F)(F)c1c(Nc2cc(OC)ccc2)cccc1
0.105402	OCC1=CC=CC(Br)=C1	B08	NC1=CC=CC=C1C(F)(F)F	A21	FC(F)(F)c1c(Nc2cc(CO)ccc2)cccc1
0.186656	CC1=CC=C(Br)C=C1	B01	FC(F)(F)C1=CC=C(N)C=C1	A22	FC(F)(F)c1ccc(Nc2ccc(C)cc2)cc1
0.258075	FC1=CC=CC=C1Br	B03	FC(F)(F)C1=CC=C(N)C=C1	A22	FC(F)(F)c1ccc(Nc2c(F)cccc2)cc1
0.131633	N#CC1=CC=C(Br)C=C1	B04	FC(F)(F)C1=CC=C(N)C=C1	A22	FC(F)(F)c1ccc(Nc2ccc(C#N)cc2)cc1
0.140739	FC1=CC(Br)=CC=C1	B05	FC(F)(F)C1=CC=C(N)C=C1	A22	FC(F)(F)c1ccc(Nc2cc(F)ccc2)cc1
0.217679	CC1=CC=C(Br)C=C1C	B06	FC(F)(F)C1=CC=C(N)C=C1	A22	FC(F)(F)c1ccc(Nc2cc(C)c(C)cc2)cc1
0.298287	COC1=CC(Br)=CC=C1	B07	FC(F)(F)C1=CC=C(N)C=C1	A22	FC(F)(F)c1ccc(Nc2cc(OC)ccc2)cc1
0.141744	OCC1=CC=CC(Br)=C1	B08	FC(F)(F)C1=CC=C(N)C=C1	A22	FC(F)(F)c1ccc(Nc2cc(CO)ccc2)cc1
0.569196	CC1=CC=C(Br)C=C1	B01	O=C(O)C1=CC=C(OC)C(N)=C1	A23	O=C(O)c1cc(Nc2ccc(C)cc2)c(OC)cc1
0.016908	OC1=CC=CC=C1Br	B02	O=C(O)C1=CC=C(OC)C(N)=C1	A23	O=C(O)c1cc(Nc2c(O)cccc2)c(OC)cc1
0.74338	FC1=CC=CC=C1Br	B03	O=C(O)C1=CC=C(OC)C(N)=C1	A23	Fc1c(Nc2c(OC)ccc(C(=O)O)c2)cccc1
0.48719	N#CC1=CC=C(Br)C=C1	B04	O=C(O)C1=CC=C(OC)C(N)=C1	A23	O=C(O)c1cc(Nc2ccc(C#N)cc2)c(OC)cc1
0.612951	FC1=CC(Br)=CC=C1	B05	O=C(O)C1=CC=C(OC)C(N)=C1	A23	Fc1cc(Nc2c(OC)ccc(C(=O)O)c2)ccc1
0.644665	CC1=CC=C(Br)C=C1C	B06	O=C(O)C1=CC=C(OC)C(N)=C1	A23	O=C(O)c1cc(Nc2cc(C)c(C)cc2)c(OC)cc1
0.50354	COC1=CC(Br)=CC=C1	B07	O=C(O)C1=CC=C(OC)C(N)=C1	A23	O=C(O)c1cc(Nc2cc(OC)ccc2)c(OC)cc1
0.591266	OCC1=CC=CC(Br)=C1	B08	O=C(O)C1=CC=C(OC)C(N)=C1	A23	O=C(O)c1cc(Nc2cc(CO)ccc2)c(OC)cc1
0.127844	OC1=CC=CC=C1Br	B02	O=C(O)C1=CC=C([N+]([O-])=O)C(N)=C1	A24	O=[N+]([O-])c1c(Nc2c(O)cccc2)cc(C(=O)O)cc1
0.52534	FC1=CC=CC=C1Br	B03	O=C(O)C1=CC=C([N+]([O-])=O)C(N)=C1	A24	Fc1c(Nc2c([N+](=O)[O-])ccc(C(=O)O)c2)cccc1
0.415184	N#CC1=CC=C(Br)C=C1	B04	O=C(O)C1=CC=C([N+]([O-])=O)C(N)=C1	A24	O=[N+]([O-])c1c(Nc2ccc(C#N)cc2)cc(C(=O)O)cc1
0.542494	FC1=CC(Br)=CC=C1	B05	O=C(O)C1=CC=C([N+]([O-])=O)C(N)=C1	A24	Fc1cc(Nc2c([N+](=O)[O-])ccc(C(=O)O)c2)ccc1
0.489934	COC1=CC(Br)=CC=C1	B07	O=C(O)C1=CC=C([N+]([O-])=O)C(N)=C1	A24	O=[N+]([O-])c1c(Nc2cc(OC)ccc2)cc(C(=O)O)cc1
0.556228	OCC1=CC=CC(Br)=C1	B08	O=C(O)C1=CC=C([N+]([O-])=O)C(N)=C1	A24	O=[N+]([O-])c1c(Nc2cc(CO)ccc2)cc(C(=O)O)cc1
0.258066	FC1=CC=C(Br)C(F)=C1	B09	NC1=CC=CC=C1C	A01	Fc1c(Nc2c(C)cccc2)ccc(F)c1
0.229116	CC(C1=CC=C(Br)C=C1)C	B11	NC1=CC=CC=C1C	A01	N(c1c(C)cccc1)c1ccc(C(C)C)cc1
0.0815394	CN(C)C1=CC=CC=C1Br	B12	NC1=CC=CC=C1C	A01	N(C)(C)c1c(Nc2c(C)cccc2)cccc1
0.547324	BrC1=CC([N+]([O-])=O)=CC=C1	B13	NC1=CC=CC=C1C	A01	O=[N+]([O-])c1cc(Nc2c(C)cccc2)ccc1
0.270711	CCCCC1=CC=C(Br)C=C1	B14	NC1=CC=CC=C1C	A01	N(c1c(C)cccc1)c1ccc(CCCC)cc1
0.0105763	O=C(OC)C1=CC=CC=C1Br	B15	NC1=CC=CC=C1C	A01	O=C(OC)c1c(Nc2c(C)cccc2)cccc1
0.113281	O=C(OC)C1=CC=C(Br)C=C1	B16	NC1=CC=CC=C1C	A01	O=C(OC)c1ccc(Nc2c(C)cccc2)cc1
0.298864	FC1=CC=C(Br)C(F)=C1	B09	NC1=CC=CC(C)=C1	A02	Fc1c(Nc2cc(C)ccc2)ccc(F)c1
0.0141431	CC(C1=CC=CC=C1Br)=O	B10	NC1=CC=CC(C)=C1	A02	O=C(C)c1c(Nc2cc(C)ccc2)cccc1
0.325031	CC(C1=CC=C(Br)C=C1)C	B11	NC1=CC=CC(C)=C1	A02	N(c1cc(C)ccc1)c1ccc(C(C)C)cc1
0.106841	CN(C)C1=CC=CC=C1Br	B12	NC1=CC=CC(C)=C1	A02	N(C)(C)c1c(Nc2cc(C)ccc2)cccc1
0.53242	BrC1=CC([N+]([O-])=O)=CC=C1	B13	NC1=CC=CC(C)=C1	A02	O=[N+]([O-])c1cc(Nc2cc(C)ccc2)ccc1
0.242562	CCCCC1=CC=C(Br)C=C1	B14	NC1=CC=CC(C)=C1	A02	N(c1cc(C)ccc1)c1ccc(CCCC)cc1
0.142084	O=C(OC)C1=CC=CC=C1Br	B15	NC1=CC=CC(C)=C1	A02	O=C(OC)c1c(Nc2cc(C)ccc2)cccc1
0.0928142	O=C(OC)C1=CC=C(Br)C=C1	B16	NC1=CC=CC(C)=C1	A02	O=C(OC)c1ccc(Nc2cc(C)ccc2)cc1
0.389423	FC1=CC=C(Br)C(F)=C1	B09	NC1=CC=C(C)C=C1	A03	Fc1c(Nc2ccc(C)cc2)ccc(F)c1
0.0133274	CC(C1=CC=CC=C1Br)=O	B10	NC1=CC=C(C)C=C1	A03	O=C(C)c1c(Nc2ccc(C)cc2)cccc1
0.227765	CC(C1=CC=C(Br)C=C1)C	B11	NC1=CC=C(C)C=C1	A03	N(c1ccc(C(C)C)cc1)c1ccc(C)cc1
0.586591	BrC1=CC([N+]([O-])=O)=CC=C1	B13	NC1=CC=C(C)C=C1	A03	O=[N+]([O-])c1cc(Nc2ccc(C)cc2)ccc1
0.271833	CCCCC1=CC=C(Br)C=C1	B14	NC1=CC=C(C)C=C1	A03	N(c1ccc(CCCC)cc1)c1ccc(C)cc1
0.199567	O=C(OC)C1=CC=CC=C1Br	B15	NC1=CC=C(C)C=C1	A03	O=C(OC)c1c(Nc2ccc(C)cc2)cccc1
0.112101	O=C(OC)C1=CC=C(Br)C=C1	B16	NC1=CC=C(C)C=C1	A03	O=C(OC)c1ccc(Nc2ccc(C)cc2)cc1
0.0118326	CC(C1=CC=CC=C1Br)=O	B10	OC1=CC=CC=C1N	A04	O=C(C)c1c(Nc2c(O)cccc2)cccc1
0.228763	BrC1=CC([N+]([O-])=O)=CC=C1	B13	OC1=CC=CC=C1N	A04	O=[N+]([O-])c1cc(Nc2c(O)cccc2)ccc1
0.0878973	O=C(OC)C1=CC=CC=C1Br	B15	OC1=CC=CC=C1N	A04	O=C(OC)c1c(Nc2c(O)cccc2)cccc1
0.509895	CC(C1=CC=C(Br)C=C1)C	B11	NC1=CC=CC=C1F	A05	Fc1c(Nc2ccc(C(C)C)cc2)cccc1
0.164589	CN(C)C1=CC=CC=C1Br	B12	NC1=CC=CC=C1F	A05	Fc1c(Nc2c(N(C)C)cccc2)cccc1
0.700753	BrC1=CC([N+]([O-])=O)=CC=C1	B13	NC1=CC=CC=C1F	A05	Fc1c(Nc2cc([N+](=O)[O-])ccc2)cccc1
0.337398	CCCCC1=CC=C(Br)C=C1	B14	NC1=CC=CC=C1F	A05	Fc1c(Nc2ccc(CCCC)cc2)cccc1
0.137359	O=C(OC)C1=CC=CC=C1Br	B15	NC1=CC=CC=C1F	A05	Fc1c(Nc2c(C(=O)OC)cccc2)cccc1
0.142713	O=C(OC)C1=CC=C(Br)C=C1	B16	NC1=CC=CC=C1F	A05	Fc1c(Nc2ccc(C(=O)OC)cc2)cccc1
0.290729	FC1=CC=C(Br)C(F)=C1	B09	FC1=CC(N)=CC=C1	A06	Fc1c(Nc2cc(F)ccc2)ccc(F)c1
0.00806511	CC(C1=CC=CC=C1Br)=O	B10	FC1=CC(N)=CC=C1	A06	Fc1cc(Nc2c(C(=O)C)cccc2)ccc1
0.22447	CC(C1=CC=C(Br)C=C1)C	B11	FC1=CC(N)=CC=C1	A06	Fc1cc(Nc2ccc(C(C)C)cc2)ccc1
0.0418124	CN(C)C1=CC=CC=C1Br	B12	FC1=CC(N)=CC=C1	A06	Fc1cc(Nc2c(N(C)C)cccc2)ccc1
0.495302	BrC1=CC([N+]([O-])=O)=CC=C1	B13	FC1=CC(N)=CC=C1	A06	Fc1cc(Nc2cc([N+](=O)[O-])ccc2)ccc1
0.158892	CCCCC1=CC=C(Br)C=C1	B14	FC1=CC(N)=CC=C1	A06	Fc1cc(Nc2ccc(CCCC)cc2)ccc1
0.109465	O=C(OC)C1=CC=CC=C1Br	B15	FC1=CC(N)=CC=C1	A06	Fc1cc(Nc2c(C(=O)OC)cccc2)ccc1
0.0647571	O=C(OC)C1=CC=C(Br)C=C1	B16	FC1=CC(N)=CC=C1	A06	Fc1cc(Nc2ccc(C(=O)OC)cc2)ccc1
0.345016	FC1=CC=C(Br)C(F)=C1	B09	NC1=CC=C(F)C=C1	A07	Fc1c(Nc2ccc(F)cc2)ccc(F)c1
0.0166474	CC(C1=CC=CC=C1Br)=O	B10	NC1=CC=C(F)C=C1	A07	Fc1ccc(Nc2c(C(=O)C)cccc2)cc1
0.266077	CC(C1=CC=C(Br)C=C1)C	B11	NC1=CC=C(F)C=C1	A07	Fc1ccc(Nc2ccc(C(C)C)cc2)cc1
0.0714785	CN(C)C1=CC=CC=C1Br	B12	NC1=CC=C(F)C=C1	A07	Fc1ccc(Nc2c(N(C)C)cccc2)cc1
0.53626	BrC1=CC([N+]([O-])=O)=CC=C1	B13	NC1=CC=C(F)C=C1	A07	Fc1ccc(Nc2cc([N+](=O)[O-])ccc2)cc1
0.355021	O=C(OC)C1=CC=CC=C1Br	B15	NC1=CC=C(F)C=C1	A07	Fc1ccc(Nc2c(C(=O)OC)cccc2)cc1
0.225843	FC1=CC=C(Br)C(F)=C1	B09	NC1=CC=CC=C1C#C	A08	Fc1c(Nc2c(C#C)cccc2)ccc(F)c1
0.0971726	CC(C1=CC=CC=C1Br)=O	B10	NC1=CC=CC=C1C#C	A08	O=C(C)c1c(Nc2c(C#C)cccc2)cccc1
0.0333344	CC(C1=CC=C(Br)C=C1)C	B11	NC1=CC=CC=C1C#C	A08	N(c1c(C#C)cccc1)c1ccc(C(C)C)cc1
0.32604	BrC1=CC([N+]([O-])=O)=CC=C1	B13	NC1=CC=CC=C1C#C	A08	O=[N+]([O-])c1cc(Nc2c(C#C)cccc2)ccc1
0.0413002	CCCCC1=CC=C(Br)C=C1	B14	NC1=CC=CC=C1C#C	A08	N(c1c(C#C)cccc1)c1ccc(CCCC)cc1
0.172387	O=C(OC)C1=CC=C(Br)C=C1	B16	NC1=CC=CC=C1C#C	A08	O=C(OC)c1ccc(Nc2c(C#C)cccc2)cc1
0.055913	FC1=CC=C(Br)C(F)=C1	B09	C#CC1=CC=CC(N)=C1	A09	Fc1c(Nc2cc(C#C)ccc2)ccc(F)c1
0.453534	CC(C1=CC=CC=C1Br)=O	B10	C#CC1=CC=CC(N)=C1	A09	O=C(C)c1c(Nc2cc(C#C)ccc2)cccc1
0.00222694	CC(C1=CC=C(Br)C=C1)C	B11	C#CC1=CC=CC(N)=C1	A09	N(c1cc(C#C)ccc1)c1ccc(C(C)C)cc1
0.0944718	BrC1=CC([N+]([O-])=O)=CC=C1	B13	C#CC1=CC=CC(N)=C1	A09	O=[N+]([O-])c1cc(Nc2cc(C#C)ccc2)ccc1
0.00958534	O=C(OC)C1=CC=CC=C1Br	B15	C#CC1=CC=CC(N)=C1	A09	O=C(OC)c1c(Nc2cc(C#C)ccc2)cccc1
0.128663	O=C(OC)C1=CC=C(Br)C=C1	B16	C#CC1=CC=CC(N)=C1	A09	O=C(OC)c1ccc(Nc2cc(C#C)ccc2)cc1
0.170879	FC1=CC=C(Br)C(F)=C1	B09	N#Cc1ccc(N)cc1	A10	Fc1c(Nc2ccc(C#N)cc2)ccc(F)c1
0.0769631	CC(C1=CC=CC=C1Br)=O	B10	N#Cc1ccc(N)cc1	A10	O=C(C)c1c(Nc2ccc(C#N)cc2)cccc1
0.0851399	CC(C1=CC=C(Br)C=C1)C	B11	N#Cc1ccc(N)cc1	A10	N#Cc1ccc(Nc2ccc(C(C)C)cc2)cc1
0.137816	CN(C)C1=CC=CC=C1Br	B12	N#Cc1ccc(N)cc1	A10	N#Cc1ccc(Nc2c(N(C)C)cccc2)cc1
0.411619	BrC1=CC([N+]([O-])=O)=CC=C1	B13	N#Cc1ccc(N)cc1	A10	O=[N+]([O-])c1cc(Nc2ccc(C#N)cc2)ccc1
0.102482	CCCCC1=CC=C(Br)C=C1	B14	N#Cc1ccc(N)cc1	A10	N#Cc1ccc(Nc2ccc(CCCC)cc2)cc1
0.0603218	O=C(OC)C1=CC=CC=C1Br	B15	N#Cc1ccc(N)cc1	A10	O=C(OC)c1c(Nc2ccc(C#N)cc2)cccc1
0.115128	O=C(OC)C1=CC=C(Br)C=C1	B16	N#Cc1ccc(N)cc1	A10	O=C(OC)c1ccc(Nc2ccc(C#N)cc2)cc1
0.0265332	CC(C1=CC=CC=C1Br)=O	B10	NC1=C(C)C=CC=C1C	A11	O=C(C)c1c(Nc2c(C)cccc2C)cccc1
0.0542422	CC(C1=CC=C(Br)C=C1)C	B11	NC1=C(C)C=CC=C1C	A11	N(c1c(C)cccc1C)c1ccc(C(C)C)cc1
0.307723	BrC1=CC([N+]([O-])=O)=CC=C1	B13	NC1=C(C)C=CC=C1C	A11	O=[N+]([O-])c1cc(Nc2c(C)cccc2C)ccc1
0.0317472	CCCCC1=CC=C(Br)C=C1	B14	NC1=C(C)C=CC=C1C	A11	N(c1c(C)cccc1C)c1ccc(CCCC)cc1
0.0221984	O=C(OC)C1=CC=C(Br)C=C1	B16	NC1=C(C)C=CC=C1C	A11	O=C(OC)c1ccc(Nc2c(C)cccc2C)cc1
0.366965	FC1=CC=C(Br)C(F)=C1	B09	NC1=CC=C(OC)C=C1	A12	Fc1c(Nc2ccc(OC)cc2)ccc(F)c1
0.0141783	CC(C1=CC=CC=C1Br)=O	B10	NC1=CC=C(OC)C=C1	A12	O=C(C)c1c(Nc2ccc(OC)cc2)cccc1
0.270456	CC(C1=CC=C(Br)C=C1)C	B11	NC1=CC=C(OC)C=C1	A12	O(C)c1ccc(Nc2ccc(C(C)C)cc2)cc1
0.171588	CN(C)C1=CC=CC=C1Br	B12	NC1=CC=C(OC)C=C1	A12	O(C)c1ccc(Nc2c(N(C)C)cccc2)cc1
0.541768	BrC1=CC([N+]([O-])=O)=CC=C1	B13	NC1=CC=C(OC)C=C1	A12	O=[N+]([O-])c1cc(Nc2ccc(OC)cc2)ccc1
0.298487	CCCCC1=CC=C(Br)C=C1	B14	NC1=CC=C(OC)C=C1	A12	O(C)c1ccc(Nc2ccc(CCCC)cc2)cc1
0.296295	O=C(OC)C1=CC=CC=C1Br	B15	NC1=CC=C(OC)C=C1	A12	O=C(OC)c1c(Nc2ccc(OC)cc2)cccc1
0.0249795	CC(C1=CC=CC=C1Br)=O	B10	NC1=CC=CC=C1OC	A13	O=C(C)c1c(Nc2c(OC)cccc2)cccc1
0.305166	CC(C1=CC=C(Br)C=C1)C	B11	NC1=CC=CC=C1OC	A13	O(C)c1c(Nc2ccc(C(C)C)cc2)cccc1
0.0776628	CN(C)C1=CC=CC=C1Br	B12	NC1=CC=CC=C1OC	A13	O(C)c1c(Nc2c(N(C)C)cccc2)cccc1
0.630309	BrC1=CC([N+]([O-])=O)=CC=C1	B13	NC1=CC=CC=C1OC	A13	O=[N+]([O-])c1cc(Nc2c(OC)cccc2)ccc1
0.310351	CCCCC1=CC=C(Br)C=C1	B14	NC1=CC=CC=C1OC	A13	O(C)c1c(Nc2ccc(CCCC)cc2)cccc1
0.0901046	O=C(OC)C1=CC=CC=C1Br	B15	NC1=CC=CC=C1OC	A13	O=C(OC)c1c(Nc2c(OC)cccc2)cccc1
0.103499	O=C(OC)C1=CC=C(Br)C=C1	B16	NC1=CC=CC=C1OC	A13	O=C(OC)c1ccc(Nc2c(OC)cccc2)cc1
0.155833	CC(C1=CC=CC=C1Br)=O	B10	NC1=CC(C(C)=O)=CC=C1	A15	O=C(C)c1c(Nc2cc(C(=O)C)ccc2)cccc1
0.738215	CC(C1=CC=C(Br)C=C1)C	B11	NC1=CC(C(C)=O)=CC=C1	A15	O=C(C)c1cc(Nc2ccc(C(C)C)cc2)ccc1
0.250371	CN(C)C1=CC=CC=C1Br	B12	NC1=CC(C(C)=O)=CC=C1	A15	O=C(C)c1cc(Nc2c(N(C)C)cccc2)ccc1
0.386578	O=C(OC)C1=CC=CC=C1Br	B15	NC1=CC(C(C)=O)=CC=C1	A15	O=C(OC)c1c(Nc2cc(C(=O)C)ccc2)cccc1
0.244111	O=C(OC)C1=CC=C(Br)C=C1	B16	NC1=CC(C(C)=O)=CC=C1	A15	O=C(OC)c1ccc(Nc2cc(C(=O)C)ccc2)cc1
0.202069	FC1=CC=C(Br)C(F)=C1	B09	CC(C1=CC=CC=C1N)=O	A16	Fc1c(Nc2c(C(=O)C)cccc2)ccc(F)c1
0.0704678	CN(C)C1=CC=CC=C1Br	B12	CC(C1=CC=CC=C1N)=O	A16	O=C(C)c1c(Nc2c(N(C)C)cccc2)cccc1
0.678103	BrC1=CC([N+]([O-])=O)=CC=C1	B13	CC(C1=CC=CC=C1N)=O	A16	O=[N+]([O-])c1cc(Nc2c(C(=O)C)cccc2)ccc1
0.323164	CCCCC1=CC=C(Br)C=C1	B14	CC(C1=CC=CC=C1N)=O	A16	O=C(C)c1c(Nc2ccc(CCCC)cc2)cccc1
0.011752	O=C(OC)C1=CC=CC=C1Br	B15	CC(C1=CC=CC=C1N)=O	A16	O=C(OC)c1c(Nc2c(C(=O)C)cccc2)cccc1
0.26882	O=C(OC)C1=CC=C(Br)C=C1	B16	CC(C1=CC=CC=C1N)=O	A16	O=C(OC)c1ccc(Nc2c(C(=O)C)cccc2)cc1
0.0813213	CC(C1=CC=CC=C1Br)=O	B10	CC(C1=CC=C(N)C=C1)=O	A17	O=C(C)c1c(Nc2ccc(C(=O)C)cc2)cccc1
0.243708	CC(C1=CC=C(Br)C=C1)C	B11	CC(C1=CC=C(N)C=C1)=O	A17	O=C(C)c1ccc(Nc2ccc(C(C)C)cc2)cc1
0.0208366	CN(C)C1=CC=CC=C1Br	B12	CC(C1=CC=C(N)C=C1)=O	A17	O=C(C)c1ccc(Nc2c(N(C)C)cccc2)cc1
0.497581	BrC1=CC([N+]([O-])=O)=CC=C1	B13	CC(C1=CC=C(N)C=C1)=O	A17	O=[N+]([O-])c1cc(Nc2ccc(C(=O)C)cc2)ccc1
0.262104	CCCCC1=CC=C(Br)C=C1	B14	CC(C1=CC=C(N)C=C1)=O	A17	O=C(C)c1ccc(Nc2ccc(CCCC)cc2)cc1
0.100304	O=C(OC)C1=CC=CC=C1Br	B15	CC(C1=CC=C(N)C=C1)=O	A17	O=C(OC)c1c(Nc2ccc(C(=O)C)cc2)cccc1
0.158934	O=C(OC)C1=CC=C(Br)C=C1	B16	CC(C1=CC=C(N)C=C1)=O	A17	O=C(OC)c1ccc(Nc2ccc(C(=O)C)cc2)cc1
0.277812	FC1=CC=C(Br)C(F)=C1	B09	NC1=CC=C([N+]([O-])=O)C=C1	A18	Fc1c(Nc2ccc([N+](=O)[O-])cc2)ccc(F)c1
0.544386	CC(C1=CC=C(Br)C=C1)C	B11	NC1=CC=C([N+]([O-])=O)C=C1	A18	O=[N+]([O-])c1ccc(Nc2ccc(C(C)C)cc2)cc1
0.73534	BrC1=CC([N+]([O-])=O)=CC=C1	B13	NC1=CC=C([N+]([O-])=O)C=C1	A18	O=[N+]([O-])c1cc(Nc2ccc([N+](=O)[O-])cc2)ccc1
0.527514	CCCCC1=CC=C(Br)C=C1	B14	NC1=CC=C([N+]([O-])=O)C=C1	A18	O=[N+]([O-])c1ccc(Nc2ccc(CCCC)cc2)cc1
0.121933	O=C(OC)C1=CC=CC=C1Br	B15	NC1=CC=C([N+]([O-])=O)C=C1	A18	O=[N+]([O-])c1ccc(Nc2c(C(=O)OC)cccc2)cc1
0.68142	BrC1=CC([N+]([O-])=O)=CC=C1	B13	N#CC1=CC=CC(OC)=C1N	A19	O=[N+]([O-])c1cc(Nc2c(OC)cccc2C#N)ccc1
0.360651	CCCCC1=CC=C(Br)C=C1	B14	N#CC1=CC=CC(OC)=C1N	A19	O(C)c1c(Nc2ccc(CCCC)cc2)c(C#N)ccc1
0.0326327	O=C(OC)C1=CC=CC=C1Br	B15	N#CC1=CC=CC(OC)=C1N	A19	O=C(OC)c1c(Nc2c(OC)cccc2C#N)cccc1
0.282081	O=C(OC)C1=CC=C(Br)C=C1	B16	N#CC1=CC=CC(OC)=C1N	A19	O=C(OC)c1ccc(Nc2c(OC)cccc2C#N)cc1
0.451617	FC1=CC=C(Br)C(F)=C1	B09	NC1=CC=C(C(C)(C)C)C=C1	A20	Fc1c(Nc2ccc(C(C)(C)C)cc2)ccc(F)c1
0.0113879	CC(C1=CC=CC=C1Br)=O	B10	NC1=CC=C(C(C)(C)C)C=C1	A20	O=C(C)c1c(Nc2ccc(C(C)(C)C)cc2)cccc1
0.244171	CC(C1=CC=C(Br)C=C1)C	B11	NC1=CC=C(C(C)(C)C)C=C1	A20	N(c1ccc(C(C)(C)C)cc1)c1ccc(C(C)C)cc1
0.0815697	CN(C)C1=CC=CC=C1Br	B12	NC1=CC=C(C(C)(C)C)C=C1	A20	N(C)(C)c1c(Nc2ccc(C(C)(C)C)cc2)cccc1
0.715157	BrC1=CC([N+]([O-])=O)=CC=C1	B13	NC1=CC=C(C(C)(C)C)C=C1	A20	O=[N+]([O-])c1cc(Nc2ccc(C(C)(C)C)cc2)ccc1
0.309916	CCCCC1=CC=C(Br)C=C1	B14	NC1=CC=C(C(C)(C)C)C=C1	A20	N(c1ccc(C(C)(C)C)cc1)c1ccc(CCCC)cc1
0.224029	O=C(OC)C1=CC=CC=C1Br	B15	NC1=CC=C(C(C)(C)C)C=C1	A20	O=C(OC)c1c(Nc2ccc(C(C)(C)C)cc2)cccc1
0.138127	O=C(OC)C1=CC=C(Br)C=C1	B16	NC1=CC=C(C(C)(C)C)C=C1	A20	O=C(OC)c1ccc(Nc2ccc(C(C)(C)C)cc2)cc1
0.147767	CC(C1=CC=C(Br)C=C1)C	B11	NC1=CC=CC=C1C(F)(F)F	A21	FC(F)(F)c1c(Nc2ccc(C(C)C)cc2)cccc1
0.106461	CCCCC1=CC=C(Br)C=C1	B14	NC1=CC=CC=C1C(F)(F)F	A21	FC(F)(F)c1c(Nc2ccc(CCCC)cc2)cccc1
0.125459	O=C(OC)C1=CC=C(Br)C=C1	B16	NC1=CC=CC=C1C(F)(F)F	A21	FC(F)(F)c1c(Nc2ccc(C(=O)OC)cc2)cccc1
0.104468	FC1=CC=C(Br)C(F)=C1	B09	FC(F)(F)C1=CC=C(N)C=C1	A22	FC(F)(F)c1ccc(Nc2c(F)cc(F)cc2)cc1
0.178844	CC(C1=CC=C(Br)C=C1)C	B11	FC(F)(F)C1=CC=C(N)C=C1	A22	FC(F)(F)c1ccc(Nc2ccc(C(C)C)cc2)cc1
0.0498123	CN(C)C1=CC=CC=C1Br	B12	FC(F)(F)C1=CC=C(N)C=C1	A22	FC(F)(F)c1ccc(Nc2c(N(C)C)cccc2)cc1
0.52532	BrC1=CC([N+]([O-])=O)=CC=C1	B13	FC(F)(F)C1=CC=C(N)C=C1	A22	FC(F)(F)c1ccc(Nc2cc([N+](=O)[O-])ccc2)cc1
0.279521	CCCCC1=CC=C(Br)C=C1	B14	FC(F)(F)C1=CC=C(N)C=C1	A22	FC(F)(F)c1ccc(Nc2ccc(CCCC)cc2)cc1
0.107574	O=C(OC)C1=CC=CC=C1Br	B15	FC(F)(F)C1=CC=C(N)C=C1	A22	FC(F)(F)c1ccc(Nc2c(C(=O)OC)cccc2)cc1
0.148999	O=C(OC)C1=CC=C(Br)C=C1	B16	FC(F)(F)C1=CC=C(N)C=C1	A22	FC(F)(F)c1ccc(Nc2ccc(C(=O)OC)cc2)cc1
0.656906	CC(C1=CC=C(Br)C=C1)C	B11	O=C(O)C1=CC=C(OC)C(N)=C1	A23	O=C(O)c1cc(Nc2ccc(C(C)C)cc2)c(OC)cc1
0.829614	CCCCC1=CC=C(Br)C=C1	B14	O=C(O)C1=CC=C(OC)C(N)=C1	A23	O=C(O)c1cc(Nc2ccc(CCCC)cc2)c(OC)cc1
0.191886	CN(C)C1=CC=CC=C1Br	B12	O=C(O)C1=CC=C([N+]([O-])=O)C(N)=C1	A24	O=[N+]([O-])c1c(Nc2c(N(C)C)cccc2)cc(C(=O)O)cc1
0.591971	CCCCC1=CC=C(Br)C=C1	B14	O=C(O)C1=CC=C([N+]([O-])=O)C(N)=C1	A24	O=[N+]([O-])c1c(Nc2ccc(CCCC)cc2)cc(C(=O)O)cc1
0.038136	O=C(OC)C1=CC=CC=C1Br	B15	O=C(O)C1=CC=C([N+]([O-])=O)C(N)=C1	A24	O=[N+]([O-])c1c(Nc2c(C(=O)OC)cccc2)cc(C(=O)O)cc1
0.254928	O=C(O)CC1=CC=CC(Br)=C1	B18	NC1=CC=CC=C1C	A01	O=C(O)Cc1cc(Nc2c(C)cccc2)ccc1
0.346245	COC1=CC=C(Br)C(OC)=C1	B20	NC1=CC=CC=C1C	A01	O(C)c1c(Nc2c(C)cccc2)ccc(OC)c1
0.418423	FC(C1=CC=C(Br)C=C1)(F)F	B21	NC1=CC=CC=C1C	A01	FC(F)(F)c1ccc(Nc2c(C)cccc2)cc1
0.295647	CCCCCC1=CC=C(Br)C=C1	B22	NC1=CC=CC=C1C	A01	N(c1c(C)cccc1)c1ccc(CCCCC)cc1
0.463832	O=C(OC)C1=CC(Br)=CC(C(OC)=O)=C1	B23	NC1=CC=CC=C1C	A01	O=C(OC)c1cc(Nc2c(C)cccc2)cc(C(=O)OC)c1
0.197185	O=C(O)CC1=CC=CC(Br)=C1	B18	NC1=CC=CC(C)=C1	A02	O=C(O)Cc1cc(Nc2cc(C)ccc2)ccc1
0.341467	COC1=CC=C(Br)C(OC)=C1	B20	NC1=CC=CC(C)=C1	A02	O(C)c1c(Nc2cc(C)ccc2)ccc(OC)c1
0.127919	FC(C1=CC=C(Br)C=C1)(F)F	B21	NC1=CC=CC(C)=C1	A02	FC(F)(F)c1ccc(Nc2cc(C)ccc2)cc1
0.246826	CCCCCC1=CC=C(Br)C=C1	B22	NC1=CC=CC(C)=C1	A02	N(c1cc(C)ccc1)c1ccc(CCCCC)cc1
0.237045	O=C(O)CC1=CC=CC(Br)=C1	B18	NC1=CC=C(C)C=C1	A03	O=C(O)Cc1cc(Nc2ccc(C)cc2)ccc1
0.288889	COC1=CC(Br)=CC=C1OC	B19	NC1=CC=C(C)C=C1	A03	O(C)c1c(OC)ccc(Nc2ccc(C)cc2)c1
0.353956	COC1=CC=C(Br)C(OC)=C1	B20	NC1=CC=C(C)C=C1	A03	O(C)c1c(Nc2ccc(C)cc2)ccc(OC)c1
0.292433	FC(C1=CC=C(Br)C=C1)(F)F	B21	NC1=CC=C(C)C=C1	A03	FC(F)(F)c1ccc(Nc2ccc(C)cc2)cc1
0.250621	CCCCCC1=CC=C(Br)C=C1	B22	NC1=CC=C(C)C=C1	A03	N(c1ccc(CCCCC)cc1)c1ccc(C)cc1
0.212861	O=C(O)C1=CC(Br)=CC=C1C	B17	OC1=CC=CC=C1N	A04	O=C(O)c1c(C)ccc(Nc2c(O)cccc2)c1
0.0156322	FC(C1=CC=C(Br)C=C1)(F)F	B21	OC1=CC=CC=C1N	A04	FC(F)(F)c1ccc(Nc2c(O)cccc2)cc1
0.338108	O=C(O)CC1=CC=CC(Br)=C1	B18	NC1=CC=CC=C1F	A05	Fc1c(Nc2cc(CC(=O)O)ccc2)cccc1
0.319047	COC1=CC(Br)=CC=C1OC	B19	NC1=CC=CC=C1F	A05	Fc1c(Nc2cc(OC)c(OC)cc2)cccc1
0.403816	COC1=CC=C(Br)C(OC)=C1	B20	NC1=CC=CC=C1F	A05	Fc1c(Nc2c(OC)cc(OC)cc2)cccc1
0.269607	FC(C1=CC=C(Br)C=C1)(F)F	B21	NC1=CC=CC=C1F	A05	FC(F)(F)c1ccc(Nc2c(F)cccc2)cc1
0.323859	CCCCCC1=CC=C(Br)C=C1	B22	NC1=CC=CC=C1F	A05	Fc1c(Nc2ccc(CCCCC)cc2)cccc1
0.449756	O=C(OC)C1=CC(Br)=CC(C(OC)=O)=C1	B23	NC1=CC=CC=C1F	A05	Fc1c(Nc2cc(C(=O)OC)cc(C(=O)OC)c2)cccc1
0.422817	O=C(O)C1=CC(Br)=CC=C1C	B17	FC1=CC(N)=CC=C1	A06	Fc1cc(Nc2cc(C(=O)O)c(C)cc2)ccc1
0.219155	O=C(O)CC1=CC=CC(Br)=C1	B18	FC1=CC(N)=CC=C1	A06	Fc1cc(Nc2cc(CC(=O)O)ccc2)ccc1
0.298855	COC1=CC(Br)=CC=C1OC	B19	FC1=CC(N)=CC=C1	A06	Fc1cc(Nc2cc(OC)c(OC)cc2)ccc1
0.370006	COC1=CC=C(Br)C(OC)=C1	B20	FC1=CC(N)=CC=C1	A06	Fc1cc(Nc2c(OC)cc(OC)cc2)ccc1
0.122712	FC(C1=CC=C(Br)C=C1)(F)F	B21	FC1=CC(N)=CC=C1	A06	FC(F)(F)c1ccc(Nc2cc(F)ccc2)cc1
0.241275	CCCCCC1=CC=C(Br)C=C1	B22	FC1=CC(N)=CC=C1	A06	Fc1cc(Nc2ccc(CCCCC)cc2)ccc1
0.547783	O=C(OC)C1=CC(Br)=CC(C(OC)=O)=C1	B23	FC1=CC(N)=CC=C1	A06	Fc1cc(Nc2cc(C(=O)OC)cc(C(=O)OC)c2)ccc1
0.58203	O=C(O)C1=CC(Br)=CC=C1C	B17	NC1=CC=C(F)C=C1	A07	Fc1ccc(Nc2cc(C(=O)O)c(C)cc2)cc1
0.250988	O=C(O)CC1=CC=CC(Br)=C1	B18	NC1=CC=C(F)C=C1	A07	Fc1ccc(Nc2cc(CC(=O)O)ccc2)cc1
0.192026	COC1=CC(Br)=CC=C1OC	B19	NC1=CC=C(F)C=C1	A07	Fc1ccc(Nc2cc(OC)c(OC)cc2)cc1
0.320865	COC1=CC=C(Br)C(OC)=C1	B20	NC1=CC=C(F)C=C1	A07	Fc1ccc(Nc2c(OC)cc(OC)cc2)cc1
0.367949	FC(C1=CC=C(Br)C=C1)(F)F	B21	NC1=CC=C(F)C=C1	A07	FC(F)(F)c1ccc(Nc2ccc(F)cc2)cc1
0.363175	CCCCCC1=CC=C(Br)C=C1	B22	NC1=CC=C(F)C=C1	A07	Fc1ccc(Nc2ccc(CCCCC)cc2)cc1
0.649133	O=C(OC)C1=CC(Br)=CC(C(OC)=O)=C1	B23	NC1=CC=C(F)C=C1	A07	Fc1ccc(Nc2cc(C(=O)OC)cc(C(=O)OC)c2)cc1
0.22197	O=C(O)C1=CC(Br)=CC=C1C	B17	NC1=CC=CC=C1C#C	A08	O=C(O)c1c(C)ccc(Nc2c(C#C)cccc2)c1
0.259308	O=C(O)CC1=CC=CC(Br)=C1	B18	NC1=CC=CC=C1C#C	A08	O=C(O)Cc1cc(Nc2c(C#C)cccc2)ccc1
0.0175591	COC1=CC(Br)=CC=C1OC	B19	NC1=CC=CC=C1C#C	A08	O(C)c1c(OC)ccc(Nc2c(C#C)cccc2)c1
0.107296	COC1=CC=C(Br)C(OC)=C1	B20	NC1=CC=CC=C1C#C	A08	O(C)c1c(Nc2c(C#C)cccc2)ccc(OC)c1
0.0139368	FC(C1=CC=C(Br)C=C1)(F)F	B21	NC1=CC=CC=C1C#C	A08	FC(F)(F)c1ccc(Nc2c(C#C)cccc2)cc1
0.0259764	CCCCCC1=CC=C(Br)C=C1	B22	NC1=CC=CC=C1C#C	A08	N(c1c(C#C)cccc1)c1ccc(CCCCC)cc1
0.0104574	O=C(OC)C1=CC(Br)=CC(C(OC)=O)=C1	B23	NC1=CC=CC=C1C#C	A08	O=C(OC)c1cc(Nc2c(C#C)cccc2)cc(C(=O)OC)c1
0.0485795	FC(C1=CC=C(C(F)(F)F)C(Br)=C1)(F)F	B24	NC1=CC=CC=C1C#C	A08	FC(F)(F)c1c(Nc2c(C#C)cccc2)cc(C(F)(F)F)cc1
0.0282221	O=C(O)CC1=CC=CC(Br)=C1	B18	C#CC1=CC=CC(N)=C1	A09	O=C(O)Cc1cc(Nc2cc(C#C)ccc2)ccc1
0.00481973	COC1=CC(Br)=CC=C1OC	B19	C#CC1=CC=CC(N)=C1	A09	O(C)c1c(OC)ccc(Nc2cc(C#C)ccc2)c1
0.0640936	FC(C1=CC=C(Br)C=C1)(F)F	B21	C#CC1=CC=CC(N)=C1	A09	FC(F)(F)c1ccc(Nc2cc(C#C)ccc2)cc1
0.029756	O=C(OC)C1=CC(Br)=CC(C(OC)=O)=C1	B23	C#CC1=CC=CC(N)=C1	A09	O=C(OC)c1cc(Nc2cc(C#C)ccc2)cc(C(=O)OC)c1
0.405799	CC1=CN=CC(Br)=C1	B25	NC1=CC=CC=C1C	A01	N(c1c(C)cccc1)c1cc(C)cnc1
0.155173	CC1=NC=CC(Br)=C1	B26	NC1=CC=CC=C1C	A01	N(c1c(C)cccc1)c1cc(C)ncc1
0.293369	CC1=CC=CC(Br)=N1	B27	NC1=CC=CC=C1C	A01	N(c1c(C)cccc1)c1nc(C)ccc1
0.199367	FC1=CC(Br)=NC=C1	B28	NC1=CC=CC=C1C	A01	Fc1cc(Nc2c(C)cccc2)ncc1
0.204681	FC1=CN=CC(Br)=C1	B29	NC1=CC=CC=C1C	A01	Fc1cc(Nc2c(C)cccc2)cnc1
0.143226	FC1=NC=CC(Br)=C1	B30	NC1=CC=CC=C1C	A01	Fc1nccc(Nc2c(C)cccc2)c1
0.123012	N#CC1=C(Br)C=NC=C1	B31	NC1=CC=CC=C1C	A01	N#Cc1c(Nc2c(C)cccc2)cncc1
0.365984	CC1=CN=CC(Br)=C1	B25	NC1=CC=C(C)C=C1	A03	N(c1cc(C)cnc1)c1ccc(C)cc1
0.11379	CC1=NC=CC(Br)=C1	B26	NC1=CC=C(C)C=C1	A03	N(c1cc(C)ncc1)c1ccc(C)cc1
0.296033	CC1=CC=CC(Br)=N1	B27	NC1=CC=C(C)C=C1	A03	N(c1nc(C)ccc1)c1ccc(C)cc1
0.245333	FC1=CC(Br)=NC=C1	B28	NC1=CC=C(C)C=C1	A03	Fc1cc(Nc2ccc(C)cc2)ncc1
0.185255	FC1=CN=CC(Br)=C1	B29	NC1=CC=C(C)C=C1	A03	Fc1cc(Nc2ccc(C)cc2)cnc1
0.141317	FC1=NC=CC(Br)=C1	B30	NC1=CC=C(C)C=C1	A03	Fc1nccc(Nc2ccc(C)cc2)c1
0.126715	N#CC1=C(Br)C=NC=C1	B31	NC1=CC=C(C)C=C1	A03	N#Cc1c(Nc2ccc(C)cc2)cncc1
0.00106838	N#CC1=C(Br)C=CN=C1	B32	NC1=CC=C(C)C=C1	A03	N#Cc1c(Nc2ccc(C)cc2)ccnc1
0.149922	CC1=CN=CC(Br)=C1	B25	OC1=CC=CC=C1N	A04	Oc1c(Nc2cc(C)cnc2)cccc1
0.136967	FC1=CC(Br)=NC=C1	B28	OC1=CC=CC=C1N	A04	Fc1cc(Nc2c(O)cccc2)ncc1
0.144864	FC1=CN=CC(Br)=C1	B29	OC1=CC=CC=C1N	A04	Fc1cc(Nc2c(O)cccc2)cnc1
0.158371	FC1=NC=CC(Br)=C1	B30	OC1=CC=CC=C1N	A04	Fc1nccc(Nc2c(O)cccc2)c1
0.0826382	N#CC1=C(Br)C=NC=C1	B31	OC1=CC=CC=C1N	A04	Oc1c(Nc2c(C#N)ccnc2)cccc1
0.403602	CC1=CN=CC(Br)=C1	B25	NC1=CC=CC=C1F	A05	Fc1c(Nc2cc(C)cnc2)cccc1
0.235518	CC1=NC=CC(Br)=C1	B26	NC1=CC=CC=C1F	A05	Fc1c(Nc2cc(C)ncc2)cccc1
0.250592	CC1=CC=CC(Br)=N1	B27	NC1=CC=CC=C1F	A05	Fc1c(Nc2nc(C)ccc2)cccc1
0.294064	FC1=CC(Br)=NC=C1	B28	NC1=CC=CC=C1F	A05	Fc1c(Nc2nccc(F)c2)cccc1
0.172109	FC1=CN=CC(Br)=C1	B29	NC1=CC=CC=C1F	A05	Fc1c(Nc2cc(F)cnc2)cccc1
0.146006	FC1=NC=CC(Br)=C1	B30	NC1=CC=CC=C1F	A05	Fc1c(Nc2cc(F)ncc2)cccc1
0.132479	N#CC1=C(Br)C=NC=C1	B31	NC1=CC=CC=C1F	A05	Fc1c(Nc2c(C#N)ccnc2)cccc1
0.00105834	N#CC1=C(Br)C=CN=C1	B32	NC1=CC=CC=C1F	A05	Fc1c(Nc2c(C#N)cncc2)cccc1
0.404199	CC1=CN=CC(Br)=C1	B25	FC1=CC(N)=CC=C1	A06	Fc1cc(Nc2cc(C)cnc2)ccc1
0.12736	CC1=NC=CC(Br)=C1	B26	FC1=CC(N)=CC=C1	A06	Fc1cc(Nc2cc(C)ncc2)ccc1
0.260169	CC1=CC=CC(Br)=N1	B27	FC1=CC(N)=CC=C1	A06	Fc1cc(Nc2nc(C)ccc2)ccc1
0.243335	FC1=CC(Br)=NC=C1	B28	FC1=CC(N)=CC=C1	A06	Fc1cc(Nc2cc(F)ccc2)ncc1
0.135713	FC1=CN=CC(Br)=C1	B29	FC1=CC(N)=CC=C1	A06	Fc1cc(Nc2cc(F)ccc2)cnc1
0.130689	FC1=NC=CC(Br)=C1	B30	FC1=CC(N)=CC=C1	A06	Fc1nccc(Nc2cc(F)ccc2)c1
0.12248	N#CC1=C(Br)C=NC=C1	B31	FC1=CC(N)=CC=C1	A06	Fc1cc(Nc2c(C#N)ccnc2)ccc1
0.0121	N#CC1=C(Br)C=CN=C1	B32	FC1=CC(N)=CC=C1	A06	Fc1cc(Nc2c(C#N)cncc2)ccc1
0.438741	CC1=CN=CC(Br)=C1	B25	NC1=CC=C(F)C=C1	A07	Fc1ccc(Nc2cc(C)cnc2)cc1
0.181882	CC1=NC=CC(Br)=C1	B26	NC1=CC=C(F)C=C1	A07	Fc1ccc(Nc2cc(C)ncc2)cc1
0.337685	CC1=CC=CC(Br)=N1	B27	NC1=CC=C(F)C=C1	A07	Fc1ccc(Nc2nc(C)ccc2)cc1
0.322616	FC1=CC(Br)=NC=C1	B28	NC1=CC=C(F)C=C1	A07	Fc1cc(Nc2ccc(F)cc2)ncc1
0.173386	FC1=CN=CC(Br)=C1	B29	NC1=CC=C(F)C=C1	A07	Fc1cc(Nc2ccc(F)cc2)cnc1
0.138196	FC1=NC=CC(Br)=C1	B30	NC1=CC=C(F)C=C1	A07	Fc1nccc(Nc2ccc(F)cc2)c1
0.136789	N#CC1=C(Br)C=NC=C1	B31	NC1=CC=C(F)C=C1	A07	Fc1ccc(Nc2c(C#N)ccnc2)cc1
0.118855	CC1=CN=CC(Br)=C1	B25	NC1=CC=CC=C1C#C	A08	N(c1c(C#C)cccc1)c1cc(C)cnc1
0.156384	CC1=NC=CC(Br)=C1	B26	NC1=CC=CC=C1C#C	A08	N(c1c(C#C)cccc1)c1cc(C)ncc1
0.0241699	FC1=CC(Br)=NC=C1	B28	NC1=CC=CC=C1C#C	A08	Fc1cc(Nc2c(C#C)cccc2)ncc1
0.0869511	FC1=CN=CC(Br)=C1	B29	NC1=CC=CC=C1C#C	A08	Fc1cc(Nc2c(C#C)cccc2)cnc1
0.104801	FC1=NC=CC(Br)=C1	B30	NC1=CC=CC=C1C#C	A08	Fc1nccc(Nc2c(C#C)cccc2)c1
0.0111586	N#CC1=C(Br)C=CN=C1	B32	C#CC1=CC=CC(N)=C1	A09	N#Cc1c(Nc2cc(C#C)ccc2)ccnc1
0.216964	CC1=CN=CC(Br)=C1	B25	N#Cc1ccc(N)cc1	A10	N#Cc1ccc(Nc2cc(C)cnc2)cc1
0.0547647	FC1=CC(Br)=NC=C1	B28	N#Cc1ccc(N)cc1	A10	Fc1cc(Nc2ccc(C#N)cc2)ncc1
0.102867	FC1=CN=CC(Br)=C1	B29	N#Cc1ccc(N)cc1	A10	Fc1cc(Nc2ccc(C#N)cc2)cnc1
0.0493419	FC1=NC=CC(Br)=C1	B30	N#Cc1ccc(N)cc1	A10	Fc1nccc(Nc2ccc(C#N)cc2)c1
0.0982479	N#CC1=C(Br)C=NC=C1	B31	N#Cc1ccc(N)cc1	A10	N#Cc1c(Nc2ccc(C#N)cc2)cncc1
0.000730274	N#CC1=C(Br)C=CN=C1	B32	N#Cc1ccc(N)cc1	A10	N#Cc1c(Nc2ccc(C#N)cc2)ccnc1
0.099929	CC1=NC=CC(Br)=C1	B26	NC1=C(C)C=CC=C1C	A11	N(c1c(C)cccc1C)c1cc(C)ncc1
0.0469405	FC1=CC(Br)=NC=C1	B28	NC1=C(C)C=CC=C1C	A11	Fc1cc(Nc2c(C)cccc2C)ncc1
0.133212	FC1=CN=CC(Br)=C1	B29	NC1=C(C)C=CC=C1C	A11	Fc1cc(Nc2c(C)cccc2C)cnc1
0.066858	FC1=NC=CC(Br)=C1	B30	NC1=C(C)C=CC=C1C	A11	Fc1nccc(Nc2c(C)cccc2C)c1
0.0264593	N#CC1=C(Br)C=NC=C1	B31	NC1=C(C)C=CC=C1C	A11	N#Cc1c(Nc2c(C)cccc2C)cncc1
0.0109403	N#CC1=C(Br)C=CN=C1	B32	NC1=C(C)C=CC=C1C	A11	N#Cc1c(Nc2c(C)cccc2C)ccnc1
0.374975	CC1=CN=CC(Br)=C1	B25	NC1=CC=C(OC)C=C1	A12	O(C)c1ccc(Nc2cc(C)cnc2)cc1
0.181476	CC1=NC=CC(Br)=C1	B26	NC1=CC=C(OC)C=C1	A12	O(C)c1ccc(Nc2cc(C)ncc2)cc1
0.365409	CC1=CC=CC(Br)=N1	B27	NC1=CC=C(OC)C=C1	A12	O(C)c1ccc(Nc2nc(C)ccc2)cc1
0.421691	CC1=CN=CC(Br)=C1	B25	NC1=CC=CC=C1OC	A13	O(C)c1c(Nc2cc(C)cnc2)cccc1
0.202849	CC1=NC=CC(Br)=C1	B26	NC1=CC=CC=C1OC	A13	O(C)c1c(Nc2cc(C)ncc2)cccc1
0.323544	CC1=CC=CC(Br)=N1	B27	NC1=CC=CC=C1OC	A13	O(C)c1c(Nc2nc(C)ccc2)cccc1
0.292682	FC1=CC(Br)=NC=C1	B28	NC1=CC=CC=C1OC	A13	Fc1cc(Nc2c(OC)cccc2)ncc1
0.236482	FC1=CN=CC(Br)=C1	B29	NC1=CC=CC=C1OC	A13	Fc1cc(Nc2c(OC)cccc2)cnc1
0.207468	FC1=NC=CC(Br)=C1	B30	NC1=CC=CC=C1OC	A13	Fc1nccc(Nc2c(OC)cccc2)c1
0.163113	N#CC1=C(Br)C=NC=C1	B31	NC1=CC=CC=C1OC	A13	O(C)c1c(Nc2c(C#N)ccnc2)cccc1
0.00219512	N#CC1=C(Br)C=CN=C1	B32	NC1=CC=CC=C1OC	A13	O(C)c1c(Nc2c(C#N)cncc2)cccc1
0.00225104	CC1=CC=CC(Br)=N1	B27	NC1=C(C)C=C(C)C=C1C	A14	N(c1c(C)cc(C)cc1C)c1nc(C)ccc1
0.0459231	FC1=CC(Br)=NC=C1	B28	NC1=C(C)C=C(C)C=C1C	A14	Fc1cc(Nc2c(C)cc(C)cc2C)ncc1
0.00311633	N#CC1=C(Br)C=NC=C1	B31	NC1=C(C)C=C(C)C=C1C	A14	N#Cc1c(Nc2c(C)cc(C)cc2C)cncc1
0.666226	CC1=CN=CC(Br)=C1	B25	NC1=CC(C(C)=O)=CC=C1	A15	O=C(C)c1cc(Nc2cc(C)cnc2)ccc1
0.482393	CC1=NC=CC(Br)=C1	B26	NC1=CC(C(C)=O)=CC=C1	A15	O=C(C)c1cc(Nc2cc(C)ncc2)ccc1
0.420422	CC1=CC=CC(Br)=N1	B27	NC1=CC(C(C)=O)=CC=C1	A15	O=C(C)c1cc(Nc2nc(C)ccc2)ccc1
0.271541	FC1=CN=CC(Br)=C1	B29	NC1=CC(C(C)=O)=CC=C1	A15	Fc1cc(Nc2cc(C(=O)C)ccc2)cnc1
0.243791	FC1=NC=CC(Br)=C1	B30	NC1=CC(C(C)=O)=CC=C1	A15	Fc1nccc(Nc2cc(C(=O)C)ccc2)c1
0.252371	N#CC1=C(Br)C=NC=C1	B31	NC1=CC(C(C)=O)=CC=C1	A15	O=C(C)c1cc(Nc2c(C#N)ccnc2)ccc1
0.309496	CC1=NC=CC(Br)=C1	B26	CC(C1=CC=CC=C1N)=O	A16	O=C(C)c1c(Nc2cc(C)ncc2)cccc1
0.059976	FC1=CC(Br)=NC=C1	B28	CC(C1=CC=CC=C1N)=O	A16	Fc1cc(Nc2c(C(=O)C)cccc2)ncc1
0.265169	FC1=CN=CC(Br)=C1	B29	CC(C1=CC=CC=C1N)=O	A16	Fc1cc(Nc2c(C(=O)C)cccc2)cnc1
0.25783	FC1=NC=CC(Br)=C1	B30	CC(C1=CC=CC=C1N)=O	A16	Fc1nccc(Nc2c(C(=O)C)cccc2)c1
0.16068	N#CC1=C(Br)C=NC=C1	B31	CC(C1=CC=CC=C1N)=O	A16	O=C(C)c1c(Nc2c(C#N)ccnc2)cccc1
0.181017	CC1=CN=CC(Br)=C1	B25	CC(C1=CC=C(N)C=C1)=O	A17	O=C(C)c1ccc(Nc2cc(C)cnc2)cc1
0.128997	CC1=CC=CC(Br)=N1	B27	CC(C1=CC=C(N)C=C1)=O	A17	O=C(C)c1ccc(Nc2nc(C)ccc2)cc1
0.109595	FC1=CC(Br)=NC=C1	B28	CC(C1=CC=C(N)C=C1)=O	A17	Fc1cc(Nc2ccc(C(=O)C)cc2)ncc1
0.146229	FC1=CN=CC(Br)=C1	B29	CC(C1=CC=C(N)C=C1)=O	A17	Fc1cc(Nc2ccc(C(=O)C)cc2)cnc1
0.115367	FC1=NC=CC(Br)=C1	B30	CC(C1=CC=C(N)C=C1)=O	A17	Fc1nccc(Nc2ccc(C(=O)C)cc2)c1
0.0887592	N#CC1=C(Br)C=NC=C1	B31	CC(C1=CC=C(N)C=C1)=O	A17	O=C(C)c1ccc(Nc2c(C#N)ccnc2)cc1
0.0172522	N#CC1=C(Br)C=CN=C1	B32	CC(C1=CC=C(N)C=C1)=O	A17	O=C(C)c1ccc(Nc2c(C#N)cncc2)cc1
0.351259	CC1=CN=CC(Br)=C1	B25	NC1=CC=C([N+]([O-])=O)C=C1	A18	O=[N+]([O-])c1ccc(Nc2cc(C)cnc2)cc1
0.263167	CC1=NC=CC(Br)=C1	B26	NC1=CC=C([N+]([O-])=O)C=C1	A18	O=[N+]([O-])c1ccc(Nc2cc(C)ncc2)cc1
0.360627	CC1=CC=CC(Br)=N1	B27	NC1=CC=C([N+]([O-])=O)C=C1	A18	O=[N+]([O-])c1ccc(Nc2nc(C)ccc2)cc1
0.328567	FC1=CC(Br)=NC=C1	B28	NC1=CC=C([N+]([O-])=O)C=C1	A18	Fc1cc(Nc2ccc([N+](=O)[O-])cc2)ncc1
0.266339	FC1=CN=CC(Br)=C1	B29	NC1=CC=C([N+]([O-])=O)C=C1	A18	Fc1cc(Nc2ccc([N+](=O)[O-])cc2)cnc1
0.275886	FC1=NC=CC(Br)=C1	B30	NC1=CC=C([N+]([O-])=O)C=C1	A18	Fc1nccc(Nc2ccc([N+](=O)[O-])cc2)c1
0.158868	N#CC1=C(Br)C=NC=C1	B31	NC1=CC=C([N+]([O-])=O)C=C1	A18	O=[N+]([O-])c1ccc(Nc2c(C#N)ccnc2)cc1
0.488176	CC1=CN=CC(Br)=C1	B25	NC1=CC=C(C(C)(C)C)C=C1	A20	N(c1cc(C)cnc1)c1ccc(C(C)(C)C)cc1
0.164425	CC1=NC=CC(Br)=C1	B26	NC1=CC=C(C(C)(C)C)C=C1	A20	N(c1cc(C)ncc1)c1ccc(C(C)(C)C)cc1
0.450193	CC1=CC=CC(Br)=N1	B27	NC1=CC=C(C(C)(C)C)C=C1	A20	N(c1nc(C)ccc1)c1ccc(C(C)(C)C)cc1
0.362725	FC1=CC(Br)=NC=C1	B28	NC1=CC=C(C(C)(C)C)C=C1	A20	Fc1cc(Nc2ccc(C(C)(C)C)cc2)ncc1
0.195973	FC1=CN=CC(Br)=C1	B29	NC1=CC=C(C(C)(C)C)C=C1	A20	Fc1cc(Nc2ccc(C(C)(C)C)cc2)cnc1
0.208968	FC1=NC=CC(Br)=C1	B30	NC1=CC=C(C(C)(C)C)C=C1	A20	Fc1nccc(Nc2ccc(C(C)(C)C)cc2)c1
0.177414	N#CC1=C(Br)C=NC=C1	B31	NC1=CC=C(C(C)(C)C)C=C1	A20	N#Cc1c(Nc2ccc(C(C)(C)C)cc2)cncc1
0.323651	CC1=CN=CC(Br)=C1	B25	NC1=CC=CC=C1C(F)(F)F	A21	FC(F)(F)c1c(Nc2cc(C)cnc2)cccc1
0.204676	CC1=NC=CC(Br)=C1	B26	NC1=CC=CC=C1C(F)(F)F	A21	FC(F)(F)c1c(Nc2cc(C)ncc2)cccc1
0.0832315	CC1=CC=CC(Br)=N1	B27	NC1=CC=CC=C1C(F)(F)F	A21	FC(F)(F)c1c(Nc2nc(C)ccc2)cccc1
0.0240931	FC1=CC(Br)=NC=C1	B28	NC1=CC=CC=C1C(F)(F)F	A21	FC(F)(F)c1c(Nc2nccc(F)c2)cccc1
0.226053	FC1=CN=CC(Br)=C1	B29	NC1=CC=CC=C1C(F)(F)F	A21	FC(F)(F)c1c(Nc2cc(F)cnc2)cccc1
0.228776	FC1=NC=CC(Br)=C1	B30	NC1=CC=CC=C1C(F)(F)F	A21	FC(F)(F)c1c(Nc2cc(F)ncc2)cccc1
0.0589505	N#CC1=C(Br)C=NC=C1	B31	NC1=CC=CC=C1C(F)(F)F	A21	FC(F)(F)c1c(Nc2c(C#N)ccnc2)cccc1
0.341537	CC1=CN=CC(Br)=C1	B25	FC(F)(F)C1=CC=C(N)C=C1	A22	FC(F)(F)c1ccc(Nc2cc(C)cnc2)cc1
0.0945131	CC1=NC=CC(Br)=C1	B26	FC(F)(F)C1=CC=C(N)C=C1	A22	FC(F)(F)c1ccc(Nc2cc(C)ncc2)cc1
0.296706	CC1=CC=CC(Br)=N1	B27	FC(F)(F)C1=CC=C(N)C=C1	A22	FC(F)(F)c1ccc(Nc2nc(C)ccc2)cc1
0.181826	FC1=CC(Br)=NC=C1	B28	FC(F)(F)C1=CC=C(N)C=C1	A22	FC(F)(F)c1ccc(Nc2nccc(F)c2)cc1
0.119223	N#CC1=C(Br)C=NC=C1	B31	FC(F)(F)C1=CC=C(N)C=C1	A22	FC(F)(F)c1ccc(Nc2c(C#N)ccnc2)cc1
0.653135	CC1=CN=CC(Br)=C1	B25	O=C(O)C1=CC=C(OC)C(N)=C1	A23	O=C(O)c1cc(Nc2cc(C)cnc2)c(OC)cc1
0.442555	FC1=CC(Br)=NC=C1	B28	O=C(O)C1=CC=C(OC)C(N)=C1	A23	Fc1cc(Nc2c(OC)ccc(C(=O)O)c2)ncc1
0.127416	N#CC1=C(Br)C=NC=C1	B31	O=C(O)C1=CC=C(OC)C(N)=C1	A23	O=C(O)c1cc(Nc2c(C#N)ccnc2)c(OC)cc1
0.00468863	N#CC1=C(Br)C=CN=C1	B32	O=C(O)C1=CC=C(OC)C(N)=C1	A23	O=C(O)c1cc(Nc2c(C#N)cncc2)c(OC)cc1
0.283738	CC1=CN=CC(Br)=C1	B25	O=C(O)C1=CC=C([N+]([O-])=O)C(N)=C1	A24	O=[N+]([O-])c1c(Nc2cc(C)cnc2)cc(C(=O)O)cc1
0.27421	CC1=CC=CC(Br)=N1	B27	O=C(O)C1=CC=C([N+]([O-])=O)C(N)=C1	A24	O=[N+]([O-])c1c(Nc2nc(C)ccc2)cc(C(=O)O)cc1
0.277496	FC1=CC(Br)=NC=C1	B28	O=C(O)C1=CC=C([N+]([O-])=O)C(N)=C1	A24	Fc1cc(Nc2c([N+](=O)[O-])ccc(C(=O)O)c2)ncc1
0.345019	FC1=CN=CC(Br)=C1	B29	O=C(O)C1=CC=C([N+]([O-])=O)C(N)=C1	A24	Fc1cc(Nc2c([N+](=O)[O-])ccc(C(=O)O)c2)cnc1
0.324475	FC1=NC=CC(Br)=C1	B30	O=C(O)C1=CC=C([N+]([O-])=O)C(N)=C1	A24	Fc1nccc(Nc2c([N+](=O)[O-])ccc(C(=O)O)c2)c1
0.136276	N#CC1=C(Br)C=NC=C1	B31	O=C(O)C1=CC=C([N+]([O-])=O)C(N)=C1	A24	O=[N+]([O-])c1c(Nc2c(C#N)ccnc2)cc(C(=O)O)cc1
0.341157	COC1=NC=CC(Br)=C1	B35	NC1=CC=CC=C1C	A01	O(C)c1nccc(Nc2c(C)cccc2)c1
0.538316	COC1=CN=CC(Br)=C1	B36	NC1=CC=CC=C1C	A01	O(C)c1cc(Nc2c(C)cccc2)cnc1
0.315376	BrC1=CN=CC(C(C)=O)=C1	B37	NC1=CC=CC=C1C	A01	O=C(C)c1cc(Nc2c(C)cccc2)cnc1
0.646634	CN(C)C1=NC=CC(Br)=C1	B38	NC1=CC=CC=C1C	A01	N(C)(C)c1nccc(Nc2c(C)cccc2)c1
0.144251	O=[N+](C1=CC(Br)=NC=C1)[O-]	B39	NC1=CC=CC=C1C	A01	O=[N+]([O-])c1cc(Nc2c(C)cccc2)ncc1
0.0875346	N#CC1=CN=C(Br)C=C1	B33	Nc1ccc(CC)cc1	A50	N#Cc1cnc(Nc2ccc(CC)cc2)cc1
0.442435	COC1=CN=C(Br)C=C1	B34	Nc1ccc(CC)cc1	A50	O(C)c1cnc(Nc2ccc(CC)cc2)cc1
0.219575	COC1=NC=CC(Br)=C1	B35	Nc1ccc(CC)cc1	A50	O(C)c1nccc(Nc2ccc(CC)cc2)c1
0.487848	COC1=CN=CC(Br)=C1	B36	Nc1ccc(CC)cc1	A50	O(C)c1cc(Nc2ccc(CC)cc2)cnc1
0.306665	BrC1=CN=CC(C(C)=O)=C1	B37	Nc1ccc(CC)cc1	A50	O=C(C)c1cc(Nc2ccc(CC)cc2)cnc1
0.69166	CN(C)C1=NC=CC(Br)=C1	B38	Nc1ccc(CC)cc1	A50	N(C)(C)c1nccc(Nc2ccc(CC)cc2)c1
0.289213	O=[N+](C1=CC(Br)=NC=C1)[O-]	B39	Nc1ccc(CC)cc1	A50	O=[N+]([O-])c1cc(Nc2ccc(CC)cc2)ncc1
0.0780256	O=[N+](C1=C(Br)C=NC=C1)[O-]	B40	Nc1ccc(CC)cc1	A50	O=[N+]([O-])c1c(Nc2ccc(CC)cc2)cncc1
0.0454595	N#CC1=CN=C(Br)C=C1	B33	NC1=CC=C(C)C=C1	A03	N#Cc1cnc(Nc2ccc(C)cc2)cc1
0.447043	COC1=CN=C(Br)C=C1	B34	NC1=CC=C(C)C=C1	A03	O(C)c1cnc(Nc2ccc(C)cc2)cc1
0.223658	COC1=NC=CC(Br)=C1	B35	NC1=CC=C(C)C=C1	A03	O(C)c1nccc(Nc2ccc(C)cc2)c1
0.530862	COC1=CN=CC(Br)=C1	B36	NC1=CC=C(C)C=C1	A03	O(C)c1cc(Nc2ccc(C)cc2)cnc1
0.420044	BrC1=CN=CC(C(C)=O)=C1	B37	NC1=CC=C(C)C=C1	A03	O=C(C)c1cc(Nc2ccc(C)cc2)cnc1
0.725241	CN(C)C1=NC=CC(Br)=C1	B38	NC1=CC=C(C)C=C1	A03	N(C)(C)c1nccc(Nc2ccc(C)cc2)c1
0.212816	O=[N+](C1=CC(Br)=NC=C1)[O-]	B39	NC1=CC=C(C)C=C1	A03	O=[N+]([O-])c1cc(Nc2ccc(C)cc2)ncc1
0.283884	COC1=CN=C(Br)C=C1	B34	OC1=CC=CC=C1N	A04	O(C)c1cnc(Nc2c(O)cccc2)cc1
0.287789	COC1=CN=CC(Br)=C1	B36	OC1=CC=CC=C1N	A04	O(C)c1cc(Nc2c(O)cccc2)cnc1
0.0291586	BrC1=CN=CC(C(C)=O)=C1	B37	OC1=CC=CC=C1N	A04	O=C(C)c1cc(Nc2c(O)cccc2)cnc1
0.39148	CN(C)C1=NC=CC(Br)=C1	B38	OC1=CC=CC=C1N	A04	Oc1c(Nc2cc(N(C)C)ncc2)cccc1
0.42879	COC1=CN=C(Br)C=C1	B34	NC1=CC=CC=C1F	A05	Fc1c(Nc2ncc(OC)cc2)cccc1
0.349154	COC1=NC=CC(Br)=C1	B35	NC1=CC=CC=C1F	A05	Fc1c(Nc2cc(OC)ncc2)cccc1
0.549271	COC1=CN=CC(Br)=C1	B36	NC1=CC=CC=C1F	A05	Fc1c(Nc2cc(OC)cnc2)cccc1
0.254042	BrC1=CN=CC(C(C)=O)=C1	B37	NC1=CC=CC=C1F	A05	Fc1c(Nc2cc(C(=O)C)cnc2)cccc1
0.677758	CN(C)C1=NC=CC(Br)=C1	B38	NC1=CC=CC=C1F	A05	Fc1c(Nc2cc(N(C)C)ncc2)cccc1
0.323016	O=[N+](C1=CC(Br)=NC=C1)[O-]	B39	NC1=CC=CC=C1F	A05	Fc1c(Nc2nccc([N+](=O)[O-])c2)cccc1
0.0609319	N#CC1=CN=C(Br)C=C1	B33	FC1=CC(N)=CC=C1	A06	Fc1cc(Nc2ncc(C#N)cc2)ccc1
0.402196	COC1=CN=C(Br)C=C1	B34	FC1=CC(N)=CC=C1	A06	Fc1cc(Nc2ncc(OC)cc2)ccc1
0.208566	COC1=NC=CC(Br)=C1	B35	FC1=CC(N)=CC=C1	A06	Fc1cc(Nc2cc(OC)ncc2)ccc1
0.474997	COC1=CN=CC(Br)=C1	B36	FC1=CC(N)=CC=C1	A06	Fc1cc(Nc2cc(OC)cnc2)ccc1
0.250927	BrC1=CN=CC(C(C)=O)=C1	B37	FC1=CC(N)=CC=C1	A06	Fc1cc(Nc2cc(C(=O)C)cnc2)ccc1
0.655545	CN(C)C1=NC=CC(Br)=C1	B38	FC1=CC(N)=CC=C1	A06	Fc1cc(Nc2cc(N(C)C)ncc2)ccc1
0.294422	O=[N+](C1=CC(Br)=NC=C1)[O-]	B39	FC1=CC(N)=CC=C1	A06	Fc1cc(Nc2nccc([N+](=O)[O-])c2)ccc1
0.0243329	O=[N+](C1=C(Br)C=NC=C1)[O-]	B40	FC1=CC(N)=CC=C1	A06	Fc1cc(Nc2c([N+](=O)[O-])ccnc2)ccc1
0.0944878	N#CC1=CN=C(Br)C=C1	B33	NC1=CC=C(F)C=C1	A07	Fc1ccc(Nc2ncc(C#N)cc2)cc1
0.394337	COC1=CN=C(Br)C=C1	B34	NC1=CC=C(F)C=C1	A07	Fc1ccc(Nc2ncc(OC)cc2)cc1
0.285262	COC1=NC=CC(Br)=C1	B35	NC1=CC=C(F)C=C1	A07	Fc1ccc(Nc2cc(OC)ncc2)cc1
0.560661	COC1=CN=CC(Br)=C1	B36	NC1=CC=C(F)C=C1	A07	Fc1ccc(Nc2cc(OC)cnc2)cc1
0.266376	BrC1=CN=CC(C(C)=O)=C1	B37	NC1=CC=C(F)C=C1	A07	Fc1ccc(Nc2cc(C(=O)C)cnc2)cc1
0.607374	CN(C)C1=NC=CC(Br)=C1	B38	NC1=CC=C(F)C=C1	A07	Fc1ccc(Nc2cc(N(C)C)ncc2)cc1
0.121353	COC1=CN=CC(Br)=C1	B36	NC1=CC=CC=C1C#C	A08	O(C)c1cc(Nc2c(C#C)cccc2)cnc1
0.176409	BrC1=CN=CC(C(C)=O)=C1	B37	NC1=CC=CC=C1C#C	A08	O=C(C)c1cc(Nc2c(C#C)cccc2)cnc1
0.222709	CN(C)C1=NC=CC(Br)=C1	B38	NC1=CC=CC=C1C#C	A08	N(C)(C)c1nccc(Nc2c(C#C)cccc2)c1
0.0421654	O=[N+](C1=CC(Br)=NC=C1)[O-]	B39	NC1=CC=CC=C1C#C	A08	O=[N+]([O-])c1cc(Nc2c(C#C)cccc2)ncc1
0.0432847	N#CC1=CN=C(Br)C=C1	B33	N#Cc1ccc(N)cc1	A10	N#Cc1cnc(Nc2ccc(C#N)cc2)cc1
0.00284921	COC1=NC=CC(Br)=C1	B35	N#Cc1ccc(N)cc1	A10	O(C)c1nccc(Nc2ccc(C#N)cc2)c1
0.0042653	N#CC1=CN=C(Br)C=C1	B33	NC1=C(C)C=CC=C1C	A11	N#Cc1cnc(Nc2c(C)cccc2C)cc1
0.0742867	COC1=CN=C(Br)C=C1	B34	NC1=C(C)C=CC=C1C	A11	O(C)c1cnc(Nc2c(C)cccc2C)cc1
0.270709	COC1=NC=CC(Br)=C1	B35	NC1=C(C)C=CC=C1C	A11	O(C)c1nccc(Nc2c(C)cccc2C)c1
0.195372	COC1=CN=CC(Br)=C1	B36	NC1=C(C)C=CC=C1C	A11	O(C)c1cc(Nc2c(C)cccc2C)cnc1
0.779495	CN(C)C1=NC=CC(Br)=C1	B38	NC1=C(C)C=CC=C1C	A11	N(C)(C)c1nccc(Nc2c(C)cccc2C)c1
0.0223428	O=[N+](C1=C(Br)C=NC=C1)[O-]	B40	NC1=C(C)C=CC=C1C	A11	O=[N+]([O-])c1c(Nc2c(C)cccc2C)cncc1
0.131973	N#CC1=CN=C(Br)C=C1	B33	NC1=CC=C(OC)C=C1	A12	O(C)c1ccc(Nc2ncc(C#N)cc2)cc1
0.595205	COC1=CN=C(Br)C=C1	B34	NC1=CC=C(OC)C=C1	A12	O(C)c1cnc(Nc2ccc(OC)cc2)cc1
0.301271	COC1=NC=CC(Br)=C1	B35	NC1=CC=C(OC)C=C1	A12	O(C)c1nccc(Nc2ccc(OC)cc2)c1
0.575119	COC1=CN=CC(Br)=C1	B36	NC1=CC=C(OC)C=C1	A12	O(C)c1cc(Nc2ccc(OC)cc2)cnc1
0.277431	BrC1=CN=CC(C(C)=O)=C1	B37	NC1=CC=C(OC)C=C1	A12	O=C(C)c1cc(Nc2ccc(OC)cc2)cnc1
0.651426	CN(C)C1=NC=CC(Br)=C1	B38	NC1=CC=C(OC)C=C1	A12	O(C)c1ccc(Nc2cc(N(C)C)ncc2)cc1
0.281234	O=[N+](C1=CC(Br)=NC=C1)[O-]	B39	NC1=CC=C(OC)C=C1	A12	O=[N+]([O-])c1cc(Nc2ccc(OC)cc2)ncc1
0.0410974	N#CC1=CN=C(Br)C=C1	B33	NC1=CC=CC=C1OC	A13	O(C)c1c(Nc2ncc(C#N)cc2)cccc1
0.492038	COC1=CN=C(Br)C=C1	B34	NC1=CC=CC=C1OC	A13	O(C)c1c(Nc2ncc(OC)cc2)cccc1
0.354005	COC1=NC=CC(Br)=C1	B35	NC1=CC=CC=C1OC	A13	O(C)c1c(Nc2cc(OC)ncc2)cccc1
0.574687	COC1=CN=CC(Br)=C1	B36	NC1=CC=CC=C1OC	A13	O(C)c1c(Nc2cc(OC)cnc2)cccc1
0.293111	BrC1=CN=CC(C(C)=O)=C1	B37	NC1=CC=CC=C1OC	A13	O=C(C)c1cc(Nc2c(OC)cccc2)cnc1
0.616704	CN(C)C1=NC=CC(Br)=C1	B38	NC1=CC=CC=C1OC	A13	O(C)c1c(Nc2cc(N(C)C)ncc2)cccc1
0.00151716	O=[N+](C1=C(Br)C=NC=C1)[O-]	B40	NC1=CC=CC=C1OC	A13	O=[N+]([O-])c1c(Nc2c(OC)cccc2)cncc1
0.000574226	COC1=CN=CC(Br)=C1	B36	NC1=C(C)C=C(C)C=C1C	A14	O(C)c1cc(Nc2c(C)cc(C)cc2C)cnc1
0.177396	N#CC1=CN=C(Br)C=C1	B33	NC1=CC(C(C)=O)=CC=C1	A15	O=C(C)c1cc(Nc2ncc(C#N)cc2)ccc1
0.458255	COC1=CN=C(Br)C=C1	B34	NC1=CC(C(C)=O)=CC=C1	A15	O=C(C)c1cc(Nc2ncc(OC)cc2)ccc1
0.542919	COC1=NC=CC(Br)=C1	B35	NC1=CC(C(C)=O)=CC=C1	A15	O=C(C)c1cc(Nc2cc(OC)ncc2)ccc1
0.82954	COC1=CN=CC(Br)=C1	B36	NC1=CC(C(C)=O)=CC=C1	A15	O=C(C)c1cc(Nc2cc(OC)cnc2)ccc1
0.341417	BrC1=CN=CC(C(C)=O)=C1	B37	NC1=CC(C(C)=O)=CC=C1	A15	O=C(C)c1cc(Nc2cc(C(=O)C)ccc2)cnc1
0.256868	O=[N+](C1=CC(Br)=NC=C1)[O-]	B39	NC1=CC(C(C)=O)=CC=C1	A15	O=[N+]([O-])c1cc(Nc2cc(C(=O)C)ccc2)ncc1
0.443938	COC1=NC=CC(Br)=C1	B35	CC(C1=CC=CC=C1N)=O	A16	O=C(C)c1c(Nc2cc(OC)ncc2)cccc1
0.390878	COC1=CN=CC(Br)=C1	B36	CC(C1=CC=CC=C1N)=O	A16	O=C(C)c1c(Nc2cc(OC)cnc2)cccc1
0.657583	CN(C)C1=NC=CC(Br)=C1	B38	CC(C1=CC=CC=C1N)=O	A16	O=C(C)c1c(Nc2cc(N(C)C)ncc2)cccc1
0.0479837	N#CC1=CN=C(Br)C=C1	B33	CC(C1=CC=C(N)C=C1)=O	A17	O=C(C)c1ccc(Nc2ncc(C#N)cc2)cc1
0.230495	COC1=CN=C(Br)C=C1	B34	CC(C1=CC=C(N)C=C1)=O	A17	O=C(C)c1ccc(Nc2ncc(OC)cc2)cc1
0.269915	COC1=NC=CC(Br)=C1	B35	CC(C1=CC=C(N)C=C1)=O	A17	O=C(C)c1ccc(Nc2cc(OC)ncc2)cc1
0.189823	COC1=CN=CC(Br)=C1	B36	CC(C1=CC=C(N)C=C1)=O	A17	O=C(C)c1ccc(Nc2cc(OC)cnc2)cc1
0.192368	BrC1=CN=CC(C(C)=O)=C1	B37	CC(C1=CC=C(N)C=C1)=O	A17	O=C(C)c1cc(Nc2ccc(C(=O)C)cc2)cnc1
0.466803	CN(C)C1=NC=CC(Br)=C1	B38	CC(C1=CC=C(N)C=C1)=O	A17	O=C(C)c1ccc(Nc2cc(N(C)C)ncc2)cc1
0.142371	O=[N+](C1=CC(Br)=NC=C1)[O-]	B39	CC(C1=CC=C(N)C=C1)=O	A17	O=[N+]([O-])c1cc(Nc2ccc(C(=O)C)cc2)ncc1
0.0577706	N#CC1=CN=C(Br)C=C1	B33	NC1=CC=C([N+]([O-])=O)C=C1	A18	O=[N+]([O-])c1ccc(Nc2ncc(C#N)cc2)cc1
0.247016	COC1=CN=C(Br)C=C1	B34	NC1=CC=C([N+]([O-])=O)C=C1	A18	O=[N+]([O-])c1ccc(Nc2ncc(OC)cc2)cc1
0.316316	COC1=NC=CC(Br)=C1	B35	NC1=CC=C([N+]([O-])=O)C=C1	A18	O=[N+]([O-])c1ccc(Nc2cc(OC)ncc2)cc1
0.38443	COC1=CN=CC(Br)=C1	B36	NC1=CC=C([N+]([O-])=O)C=C1	A18	O=[N+]([O-])c1ccc(Nc2cc(OC)cnc2)cc1
0.265568	BrC1=CN=CC(C(C)=O)=C1	B37	NC1=CC=C([N+]([O-])=O)C=C1	A18	O=[N+]([O-])c1ccc(Nc2cc(C(=O)C)cnc2)cc1
0.536315	CN(C)C1=NC=CC(Br)=C1	B38	NC1=CC=C([N+]([O-])=O)C=C1	A18	O=[N+]([O-])c1ccc(Nc2cc(N(C)C)ncc2)cc1
0.00880458	O=[N+](C1=C(Br)C=NC=C1)[O-]	B40	NC1=CC=C([N+]([O-])=O)C=C1	A18	O=[N+]([O-])c1c(Nc2ccc([N+](=O)[O-])cc2)cncc1
0.498983	COC1=CN=C(Br)C=C1	B34	NC1=CC=C(C)C(C)=C1	A49	O(C)c1cnc(Nc2cc(C)c(C)cc2)cc1
0.250746	COC1=NC=CC(Br)=C1	B35	NC1=CC=C(C)C(C)=C1	A49	O(C)c1nccc(Nc2cc(C)c(C)cc2)c1
0.600966	COC1=CN=CC(Br)=C1	B36	NC1=CC=C(C)C(C)=C1	A49	O(C)c1cc(Nc2cc(C)c(C)cc2)cnc1
0.307582	BrC1=CN=CC(C(C)=O)=C1	B37	NC1=CC=C(C)C(C)=C1	A49	O=C(C)c1cc(Nc2cc(C)c(C)cc2)cnc1
0.777677	CN(C)C1=NC=CC(Br)=C1	B38	NC1=CC=C(C)C(C)=C1	A49	N(C)(C)c1nccc(Nc2cc(C)c(C)cc2)c1
0.257729	O=[N+](C1=CC(Br)=NC=C1)[O-]	B39	NC1=CC=C(C)C(C)=C1	A49	O=[N+]([O-])c1cc(Nc2cc(C)c(C)cc2)ncc1
0.0886987	N#CC1=CN=C(Br)C=C1	B33	NC1=CC=C(C(C)(C)C)C=C1	A20	N#Cc1cnc(Nc2ccc(C(C)(C)C)cc2)cc1
0.49247	COC1=CN=C(Br)C=C1	B34	NC1=CC=C(C(C)(C)C)C=C1	A20	O(C)c1cnc(Nc2ccc(C(C)(C)C)cc2)cc1
0.231412	COC1=NC=CC(Br)=C1	B35	NC1=CC=C(C(C)(C)C)C=C1	A20	O(C)c1nccc(Nc2ccc(C(C)(C)C)cc2)c1
0.605664	COC1=CN=CC(Br)=C1	B36	NC1=CC=C(C(C)(C)C)C=C1	A20	O(C)c1cc(Nc2ccc(C(C)(C)C)cc2)cnc1
0.767145	CN(C)C1=NC=CC(Br)=C1	B38	NC1=CC=C(C(C)(C)C)C=C1	A20	N(C)(C)c1nccc(Nc2ccc(C(C)(C)C)cc2)c1
0.223865	O=[N+](C1=CC(Br)=NC=C1)[O-]	B39	NC1=CC=C(C(C)(C)C)C=C1	A20	O=[N+]([O-])c1cc(Nc2ccc(C(C)(C)C)cc2)ncc1
0.0727305	O=[N+](C1=C(Br)C=NC=C1)[O-]	B40	NC1=CC=C(C(C)(C)C)C=C1	A20	O=[N+]([O-])c1c(Nc2ccc(C(C)(C)C)cc2)cncc1
0.00658294	N#CC1=CN=C(Br)C=C1	B33	NC1=CC=CC=C1C(F)(F)F	A21	FC(F)(F)c1c(Nc2ncc(C#N)cc2)cccc1
0.145301	COC1=CN=C(Br)C=C1	B34	NC1=CC=CC=C1C(F)(F)F	A21	FC(F)(F)c1c(Nc2ncc(OC)cc2)cccc1
0.347541	COC1=NC=CC(Br)=C1	B35	NC1=CC=CC=C1C(F)(F)F	A21	FC(F)(F)c1c(Nc2cc(OC)ncc2)cccc1
0.443323	COC1=CN=CC(Br)=C1	B36	NC1=CC=CC=C1C(F)(F)F	A21	FC(F)(F)c1c(Nc2cc(OC)cnc2)cccc1
0.255681	BrC1=CN=CC(C(C)=O)=C1	B37	NC1=CC=CC=C1C(F)(F)F	A21	FC(F)(F)c1c(Nc2cc(C(=O)C)cnc2)cccc1
0.686145	CN(C)C1=NC=CC(Br)=C1	B38	NC1=CC=CC=C1C(F)(F)F	A21	FC(F)(F)c1c(Nc2cc(N(C)C)ncc2)cccc1
0.00728742	O=[N+](C1=CC(Br)=NC=C1)[O-]	B39	NC1=CC=CC=C1C(F)(F)F	A21	FC(F)(F)c1c(Nc2nccc([N+](=O)[O-])c2)cccc1
0.0551351	N#CC1=CN=C(Br)C=C1	B33	FC(F)(F)C1=CC=C(N)C=C1	A22	FC(F)(F)c1ccc(Nc2ncc(C#N)cc2)cc1
0.184689	COC1=CN=C(Br)C=C1	B34	FC(F)(F)C1=CC=C(N)C=C1	A22	FC(F)(F)c1ccc(Nc2ncc(OC)cc2)cc1
0.188196	COC1=NC=CC(Br)=C1	B35	FC(F)(F)C1=CC=C(N)C=C1	A22	FC(F)(F)c1ccc(Nc2cc(OC)ncc2)cc1
0.279461	COC1=CN=CC(Br)=C1	B36	FC(F)(F)C1=CC=C(N)C=C1	A22	FC(F)(F)c1ccc(Nc2cc(OC)cnc2)cc1
0.221819	BrC1=CN=CC(C(C)=O)=C1	B37	FC(F)(F)C1=CC=C(N)C=C1	A22	FC(F)(F)c1ccc(Nc2cc(C(=O)C)cnc2)cc1
0.615491	CN(C)C1=NC=CC(Br)=C1	B38	FC(F)(F)C1=CC=C(N)C=C1	A22	FC(F)(F)c1ccc(Nc2cc(N(C)C)ncc2)cc1
0.187987	O=[N+](C1=CC(Br)=NC=C1)[O-]	B39	FC(F)(F)C1=CC=C(N)C=C1	A22	FC(F)(F)c1ccc(Nc2nccc([N+](=O)[O-])c2)cc1
0.205387	N#CC1=CN=C(Br)C=C1	B33	O=C(O)C1=CC=C(OC)C(N)=C1	A23	O=C(O)c1cc(Nc2ncc(C#N)cc2)c(OC)cc1
0.315054	BrC1=CN=CC(C(C)=O)=C1	B37	O=C(O)C1=CC=C(OC)C(N)=C1	A23	O=C(O)c1cc(Nc2cc(C(=O)C)cnc2)c(OC)cc1
0.915084	CN(C)C1=NC=CC(Br)=C1	B38	O=C(O)C1=CC=C(OC)C(N)=C1	A23	O=C(O)c1cc(Nc2cc(N(C)C)ncc2)c(OC)cc1
0.315961	O=[N+](C1=CC(Br)=NC=C1)[O-]	B39	O=C(O)C1=CC=C(OC)C(N)=C1	A23	O=[N+]([O-])c1cc(Nc2c(OC)ccc(C(=O)O)c2)ncc1
0.0588464	N#CC1=CN=C(Br)C=C1	B33	O=C(O)C1=CC=C([N+]([O-])=O)C(N)=C1	A24	O=[N+]([O-])c1c(Nc2ncc(C#N)cc2)cc(C(=O)O)cc1
0.256369	COC1=CN=C(Br)C=C1	B34	O=C(O)C1=CC=C([N+]([O-])=O)C(N)=C1	A24	O=[N+]([O-])c1c(Nc2ncc(OC)cc2)cc(C(=O)O)cc1
0.344178	COC1=NC=CC(Br)=C1	B35	O=C(O)C1=CC=C([N+]([O-])=O)C(N)=C1	A24	O=[N+]([O-])c1c(Nc2cc(OC)ncc2)cc(C(=O)O)cc1
0.278182	COC1=CN=CC(Br)=C1	B36	O=C(O)C1=CC=C([N+]([O-])=O)C(N)=C1	A24	O=[N+]([O-])c1c(Nc2cc(OC)cnc2)cc(C(=O)O)cc1
0.227628	BrC1=CN=CC(C(C)=O)=C1	B37	O=C(O)C1=CC=C([N+]([O-])=O)C(N)=C1	A24	O=[N+]([O-])c1c(Nc2cc(C(=O)C)cnc2)cc(C(=O)O)cc1
0.651492	CN(C)C1=NC=CC(Br)=C1	B38	O=C(O)C1=CC=C([N+]([O-])=O)C(N)=C1	A24	O=[N+]([O-])c1c(Nc2cc(N(C)C)ncc2)cc(C(=O)O)cc1
0.186439	O=[N+](C1=CC(Br)=NC=C1)[O-]	B39	O=C(O)C1=CC=C([N+]([O-])=O)C(N)=C1	A24	O=[N+]([O-])c1c(Nc2nccc([N+](=O)[O-])c2)cc(C(=O)O)cc1
0.0526417	CC1=CC(Br)=CC(C)=N1	B43	NC1=CC=CC=C1C	A01	N(c1c(C)cccc1)c1cc(C)nc(C)c1
0.0727494	FC(C1=NC=CC=C1Br)(F)F	B47	NC1=CC=CC=C1C	A01	FC(F)(F)c1c(Nc2c(C)cccc2)cccn1
0.172262	FC(C1=CC=CC(Br)=N1)F	B41	Nc1ccc(CC)cc1	A50	FC(F)c1nc(Nc2ccc(CC)cc2)ccc1
0.107879	O=C(OC)C1=CN=C(Br)C=C1	B42	Nc1ccc(CC)cc1	A50	O=C(OC)c1cnc(Nc2ccc(CC)cc2)cc1
0.17853	CC1=CC(Br)=CC(C)=N1	B43	Nc1ccc(CC)cc1	A50	N(c1cc(C)nc(C)c1)c1ccc(CC)cc1
0.177285	FC(C1=CC(Br)=NC=C1)(F)F	B44	Nc1ccc(CC)cc1	A50	FC(F)(F)c1cc(Nc2ccc(CC)cc2)ncc1
0.136723	FC(C1=NC=C(Br)C=C1)(F)F	B45	Nc1ccc(CC)cc1	A50	FC(F)(F)c1ncc(Nc2ccc(CC)cc2)cc1
0.139785	FC(C1=NC=CC(Br)=C1)(F)F	B46	Nc1ccc(CC)cc1	A50	FC(F)(F)c1nccc(Nc2ccc(CC)cc2)c1
0.0837927	FC(C1=NC=CC=C1Br)(F)F	B47	Nc1ccc(CC)cc1	A50	FC(F)(F)c1c(Nc2ccc(CC)cc2)cccn1
0.0006421	O=C(OCC)C1=NC=CC(Br)=C1	B48	Nc1ccc(CC)cc1	A50	O=C(OCC)c1nccc(Nc2ccc(CC)cc2)c1
0.17099	FC(C1=CC=CC(Br)=N1)F	B41	NC1=CC=C(C)C=C1	A03	FC(F)c1nc(Nc2ccc(C)cc2)ccc1
0.0867882	O=C(OC)C1=CN=C(Br)C=C1	B42	NC1=CC=C(C)C=C1	A03	O=C(OC)c1cnc(Nc2ccc(C)cc2)cc1
0.146096	CC1=CC(Br)=CC(C)=N1	B43	NC1=CC=C(C)C=C1	A03	N(c1cc(C)nc(C)c1)c1ccc(C)cc1
0.156591	FC(C1=CC(Br)=NC=C1)(F)F	B44	NC1=CC=C(C)C=C1	A03	FC(F)(F)c1cc(Nc2ccc(C)cc2)ncc1
0.128098	FC(C1=NC=C(Br)C=C1)(F)F	B45	NC1=CC=C(C)C=C1	A03	FC(F)(F)c1ncc(Nc2ccc(C)cc2)cc1
0.122036	FC(C1=NC=CC(Br)=C1)(F)F	B46	NC1=CC=C(C)C=C1	A03	FC(F)(F)c1nccc(Nc2ccc(C)cc2)c1
0.0830398	FC(C1=NC=CC=C1Br)(F)F	B47	NC1=CC=C(C)C=C1	A03	FC(F)(F)c1c(Nc2ccc(C)cc2)cccn1
0.15963	FC(C1=CC=CC(Br)=N1)F	B41	OC1=CC=CC=C1N	A04	FC(F)c1nc(Nc2c(O)cccc2)ccc1
0.238825	O=C(OC)C1=CN=C(Br)C=C1	B42	OC1=CC=CC=C1N	A04	O=C(OC)c1cnc(Nc2c(O)cccc2)cc1
0.231416	CC1=CC(Br)=CC(C)=N1	B43	OC1=CC=CC=C1N	A04	Oc1c(Nc2cc(C)nc(C)c2)cccc1
0.184958	FC(C1=CC(Br)=NC=C1)(F)F	B44	OC1=CC=CC=C1N	A04	FC(F)(F)c1cc(Nc2c(O)cccc2)ncc1
0.151252	FC(C1=NC=C(Br)C=C1)(F)F	B45	OC1=CC=CC=C1N	A04	FC(F)(F)c1ncc(Nc2c(O)cccc2)cc1
0.137081	FC(C1=NC=CC=C1Br)(F)F	B47	OC1=CC=CC=C1N	A04	FC(F)(F)c1c(Nc2c(O)cccc2)cccn1
0.199795	FC(C1=CC=CC(Br)=N1)F	B41	NC1=CC=CC=C1F	A05	FC(F)c1nc(Nc2c(F)cccc2)ccc1
0.111648	O=C(OC)C1=CN=C(Br)C=C1	B42	NC1=CC=CC=C1F	A05	Fc1c(Nc2ncc(C(=O)OC)cc2)cccc1
0.232773	CC1=CC(Br)=CC(C)=N1	B43	NC1=CC=CC=C1F	A05	Fc1c(Nc2cc(C)nc(C)c2)cccc1
0.199601	FC(C1=CC(Br)=NC=C1)(F)F	B44	NC1=CC=CC=C1F	A05	FC(F)(F)c1cc(Nc2c(F)cccc2)ncc1
0.177292	FC(C1=NC=C(Br)C=C1)(F)F	B45	NC1=CC=CC=C1F	A05	FC(F)(F)c1ncc(Nc2c(F)cccc2)cc1
0.142479	FC(C1=NC=CC(Br)=C1)(F)F	B46	NC1=CC=CC=C1F	A05	FC(F)(F)c1nccc(Nc2c(F)cccc2)c1
0.00032562	O=C(OCC)C1=NC=CC(Br)=C1	B48	NC1=CC=CC=C1F	A05	Fc1c(Nc2cc(C(=O)OCC)ncc2)cccc1
0.176504	FC(C1=CC=CC(Br)=N1)F	B41	FC1=CC(N)=CC=C1	A06	FC(F)c1nc(Nc2cc(F)ccc2)ccc1
0.0739324	O=C(OC)C1=CN=C(Br)C=C1	B42	FC1=CC(N)=CC=C1	A06	Fc1cc(Nc2ncc(C(=O)OC)cc2)ccc1
0.147667	CC1=CC(Br)=CC(C)=N1	B43	FC1=CC(N)=CC=C1	A06	Fc1cc(Nc2cc(C)nc(C)c2)ccc1
0.215574	FC(C1=CC(Br)=NC=C1)(F)F	B44	FC1=CC(N)=CC=C1	A06	FC(F)(F)c1cc(Nc2cc(F)ccc2)ncc1
0.130058	FC(C1=NC=C(Br)C=C1)(F)F	B45	FC1=CC(N)=CC=C1	A06	FC(F)(F)c1ncc(Nc2cc(F)ccc2)cc1
0.106367	FC(C1=NC=CC(Br)=C1)(F)F	B46	FC1=CC(N)=CC=C1	A06	FC(F)(F)c1nccc(Nc2cc(F)ccc2)c1
0.200227	FC(C1=CC=CC(Br)=N1)F	B41	NC1=CC=C(F)C=C1	A07	FC(F)c1nc(Nc2ccc(F)cc2)ccc1
0.114946	O=C(OC)C1=CN=C(Br)C=C1	B42	NC1=CC=C(F)C=C1	A07	Fc1ccc(Nc2ncc(C(=O)OC)cc2)cc1
0.200894	CC1=CC(Br)=CC(C)=N1	B43	NC1=CC=C(F)C=C1	A07	Fc1ccc(Nc2cc(C)nc(C)c2)cc1
0.165962	FC(C1=CC(Br)=NC=C1)(F)F	B44	NC1=CC=C(F)C=C1	A07	FC(F)(F)c1cc(Nc2ccc(F)cc2)ncc1
0.14229	FC(C1=NC=C(Br)C=C1)(F)F	B45	NC1=CC=C(F)C=C1	A07	FC(F)(F)c1ncc(Nc2ccc(F)cc2)cc1
0.124081	FC(C1=NC=CC(Br)=C1)(F)F	B46	NC1=CC=C(F)C=C1	A07	FC(F)(F)c1nccc(Nc2ccc(F)cc2)c1
0.11988	FC(C1=NC=C(Br)C=C1)(F)F	B45	NC1=CC=CC=C1C#C	A08	FC(F)(F)c1ncc(Nc2c(C#C)cccc2)cc1
0.11361	FC(C1=NC=CC(Br)=C1)(F)F	B46	NC1=CC=CC=C1C#C	A08	FC(F)(F)c1nccc(Nc2c(C#C)cccc2)c1
0.0957463	FC(C1=NC=CC=C1Br)(F)F	B47	NC1=CC=CC=C1C#C	A08	FC(F)(F)c1c(Nc2c(C#C)cccc2)cccn1
0.0018936	O=C(OC)C1=CN=C(Br)C=C1	B42	C#CC1=CC=CC(N)=C1	A09	O=C(OC)c1cnc(Nc2cc(C#C)ccc2)cc1
0.0132847	CC1=CC(Br)=CC(C)=N1	B43	C#CC1=CC=CC(N)=C1	A09	N(c1cc(C)nc(C)c1)c1cc(C#C)ccc1
0.00217496	FC(C1=NC=C(Br)C=C1)(F)F	B45	C#CC1=CC=CC(N)=C1	A09	FC(F)(F)c1ncc(Nc2cc(C#C)ccc2)cc1
0.00965085	FC(C1=NC=CC=C1Br)(F)F	B47	C#CC1=CC=CC(N)=C1	A09	FC(F)(F)c1c(Nc2cc(C#C)ccc2)cccn1
0.00581519	O=C(OCC)C1=NC=CC(Br)=C1	B48	C#CC1=CC=CC(N)=C1	A09	O=C(OCC)c1nccc(Nc2cc(C#C)ccc2)c1
0.062226	FC(C1=CC=CC(Br)=N1)F	B41	N#Cc1ccc(N)cc1	A10	FC(F)c1nc(Nc2ccc(C#N)cc2)ccc1
0.0893813	O=C(OC)C1=CN=C(Br)C=C1	B42	N#Cc1ccc(N)cc1	A10	O=C(OC)c1cnc(Nc2ccc(C#N)cc2)cc1
0.151238	FC(C1=NC=C(Br)C=C1)(F)F	B45	N#Cc1ccc(N)cc1	A10	FC(F)(F)c1ncc(Nc2ccc(C#N)cc2)cc1
0.0800613	FC(C1=NC=CC(Br)=C1)(F)F	B46	N#Cc1ccc(N)cc1	A10	FC(F)(F)c1nccc(Nc2ccc(C#N)cc2)c1
0.162607	FC(C1=NC=CC=C1Br)(F)F	B47	N#Cc1ccc(N)cc1	A10	FC(F)(F)c1c(Nc2ccc(C#N)cc2)cccn1
0.0650817	FC(C1=CC=CC(Br)=N1)F	B41	NC1=C(C)C=CC=C1C	A11	FC(F)c1nc(Nc2c(C)cccc2C)ccc1
0.270127	CC1=CC(Br)=CC(C)=N1	B43	NC1=C(C)C=CC=C1C	A11	N(c1c(C)cccc1C)c1cc(C)nc(C)c1
0.00496125	FC(C1=CC(Br)=NC=C1)(F)F	B44	NC1=C(C)C=CC=C1C	A11	FC(F)(F)c1cc(Nc2c(C)cccc2C)ncc1
0.0425756	FC(C1=NC=C(Br)C=C1)(F)F	B45	NC1=C(C)C=CC=C1C	A11	FC(F)(F)c1ncc(Nc2c(C)cccc2C)cc1
0.0280082	FC(C1=NC=CC(Br)=C1)(F)F	B46	NC1=C(C)C=CC=C1C	A11	FC(F)(F)c1nccc(Nc2c(C)cccc2C)c1
0.00174718	FC(C1=NC=CC=C1Br)(F)F	B47	NC1=C(C)C=CC=C1C	A11	FC(F)(F)c1c(Nc2c(C)cccc2C)cccn1
0.0303599	O=C(OCC)C1=NC=CC(Br)=C1	B48	NC1=C(C)C=CC=C1C	A11	O=C(OCC)c1nccc(Nc2c(C)cccc2C)c1
0.27342	O=C(OC)C1=CN=C(Br)C=C1	B42	NC1=CC=C(OC)C=C1	A12	O=C(OC)c1cnc(Nc2ccc(OC)cc2)cc1
0.22044	CC1=CC(Br)=CC(C)=N1	B43	NC1=CC=C(OC)C=C1	A12	O(C)c1ccc(Nc2cc(C)nc(C)c2)cc1
0.382278	FC(C1=CC(Br)=NC=C1)(F)F	B44	NC1=CC=C(OC)C=C1	A12	FC(F)(F)c1cc(Nc2ccc(OC)cc2)ncc1
0.208985	FC(C1=NC=CC(Br)=C1)(F)F	B46	NC1=CC=C(OC)C=C1	A12	FC(F)(F)c1nccc(Nc2ccc(OC)cc2)c1
0.143044	FC(C1=NC=CC=C1Br)(F)F	B47	NC1=CC=C(OC)C=C1	A12	FC(F)(F)c1c(Nc2ccc(OC)cc2)cccn1
0.137945	FC(C1=CC=CC(Br)=N1)F	B41	NC1=CC=CC=C1OC	A13	FC(F)c1nc(Nc2c(OC)cccc2)ccc1
0.176743	O=C(OC)C1=CN=C(Br)C=C1	B42	NC1=CC=CC=C1OC	A13	O=C(OC)c1cnc(Nc2c(OC)cccc2)cc1
0.272848	CC1=CC(Br)=CC(C)=N1	B43	NC1=CC=CC=C1OC	A13	O(C)c1c(Nc2cc(C)nc(C)c2)cccc1
0.247063	FC(C1=CC(Br)=NC=C1)(F)F	B44	NC1=CC=CC=C1OC	A13	FC(F)(F)c1cc(Nc2c(OC)cccc2)ncc1
0.201006	FC(C1=NC=C(Br)C=C1)(F)F	B45	NC1=CC=CC=C1OC	A13	FC(F)(F)c1ncc(Nc2c(OC)cccc2)cc1
0.212615	FC(C1=NC=CC(Br)=C1)(F)F	B46	NC1=CC=CC=C1OC	A13	FC(F)(F)c1nccc(Nc2c(OC)cccc2)c1
0.138078	FC(C1=NC=CC=C1Br)(F)F	B47	NC1=CC=CC=C1OC	A13	FC(F)(F)c1c(Nc2c(OC)cccc2)cccn1
0.0414675	CC1=CC(Br)=CC(C)=N1	B43	NC1=C(C)C=C(C)C=C1C	A14	N(c1c(C)cc(C)cc1C)c1cc(C)nc(C)c1
0.02428	FC(C1=NC=C(Br)C=C1)(F)F	B45	NC1=C(C)C=C(C)C=C1C	A14	FC(F)(F)c1ncc(Nc2c(C)cc(C)cc2C)cc1
0.00450539	FC(C1=NC=CC(Br)=C1)(F)F	B46	NC1=C(C)C=C(C)C=C1C	A14	FC(F)(F)c1nccc(Nc2c(C)cc(C)cc2C)c1
0.00121471	FC(C1=NC=CC=C1Br)(F)F	B47	NC1=C(C)C=C(C)C=C1C	A14	FC(F)(F)c1c(Nc2c(C)cc(C)cc2C)cccn1
0.286425	FC(C1=CC=CC(Br)=N1)F	B41	NC1=CC(C(C)=O)=CC=C1	A15	FC(F)c1nc(Nc2cc(C(=O)C)ccc2)ccc1
0.249185	O=C(OC)C1=CN=C(Br)C=C1	B42	NC1=CC(C(C)=O)=CC=C1	A15	O=C(OC)c1cnc(Nc2cc(C(=O)C)ccc2)cc1
0.563023	CC1=CC(Br)=CC(C)=N1	B43	NC1=CC(C(C)=O)=CC=C1	A15	O=C(C)c1cc(Nc2cc(C)nc(C)c2)ccc1
0.31337	FC(C1=CC(Br)=NC=C1)(F)F	B44	NC1=CC(C(C)=O)=CC=C1	A15	FC(F)(F)c1cc(Nc2cc(C(=O)C)ccc2)ncc1
0.220617	FC(C1=NC=C(Br)C=C1)(F)F	B45	NC1=CC(C(C)=O)=CC=C1	A15	FC(F)(F)c1ncc(Nc2cc(C(=O)C)ccc2)cc1
0.258255	FC(C1=NC=CC(Br)=C1)(F)F	B46	NC1=CC(C(C)=O)=CC=C1	A15	FC(F)(F)c1nccc(Nc2cc(C(=O)C)ccc2)c1
0.200472	FC(C1=NC=CC=C1Br)(F)F	B47	NC1=CC(C(C)=O)=CC=C1	A15	FC(F)(F)c1c(Nc2cc(C(=O)C)ccc2)cccn1
0.378304	FC(C1=CC=CC(Br)=N1)F	B41	CC(C1=CC=CC=C1N)=O	A16	FC(F)c1nc(Nc2c(C(=O)C)cccc2)ccc1
0.096843	O=C(OC)C1=CN=C(Br)C=C1	B42	CC(C1=CC=CC=C1N)=O	A16	O=C(OC)c1cnc(Nc2c(C(=O)C)cccc2)cc1
0.253415	FC(C1=CC(Br)=NC=C1)(F)F	B44	CC(C1=CC=CC=C1N)=O	A16	FC(F)(F)c1cc(Nc2c(C(=O)C)cccc2)ncc1
0.247764	FC(C1=NC=C(Br)C=C1)(F)F	B45	CC(C1=CC=CC=C1N)=O	A16	FC(F)(F)c1ncc(Nc2c(C(=O)C)cccc2)cc1
0.132934	FC(C1=NC=CC(Br)=C1)(F)F	B46	CC(C1=CC=CC=C1N)=O	A16	FC(F)(F)c1nccc(Nc2c(C(=O)C)cccc2)c1
0.00193887	O=C(OCC)C1=NC=CC(Br)=C1	B48	CC(C1=CC=CC=C1N)=O	A16	O=C(OCC)c1nccc(Nc2c(C(=O)C)cccc2)c1
0.148978	FC(C1=CC=CC(Br)=N1)F	B41	CC(C1=CC=C(N)C=C1)=O	A17	FC(F)c1nc(Nc2ccc(C(=O)C)cc2)ccc1
0.12412	O=C(OC)C1=CN=C(Br)C=C1	B42	CC(C1=CC=C(N)C=C1)=O	A17	O=C(OC)c1cnc(Nc2ccc(C(=O)C)cc2)cc1
0.242401	CC1=CC(Br)=CC(C)=N1	B43	CC(C1=CC=C(N)C=C1)=O	A17	O=C(C)c1ccc(Nc2cc(C)nc(C)c2)cc1
0.170782	FC(C1=CC(Br)=NC=C1)(F)F	B44	CC(C1=CC=C(N)C=C1)=O	A17	FC(F)(F)c1cc(Nc2ccc(C(=O)C)cc2)ncc1
0.156875	FC(C1=NC=C(Br)C=C1)(F)F	B45	CC(C1=CC=C(N)C=C1)=O	A17	FC(F)(F)c1ncc(Nc2ccc(C(=O)C)cc2)cc1
0.121903	FC(C1=NC=CC(Br)=C1)(F)F	B46	CC(C1=CC=C(N)C=C1)=O	A17	FC(F)(F)c1nccc(Nc2ccc(C(=O)C)cc2)c1
0.0610416	FC(C1=NC=CC=C1Br)(F)F	B47	CC(C1=CC=C(N)C=C1)=O	A17	FC(F)(F)c1c(Nc2ccc(C(=O)C)cc2)cccn1
0.00103383	O=C(OCC)C1=NC=CC(Br)=C1	B48	CC(C1=CC=C(N)C=C1)=O	A17	O=C(OCC)c1nccc(Nc2ccc(C(=O)C)cc2)c1
0.040165	O=C(OC)C1=CN=C(Br)C=C1	B42	NC1=CC=C([N+]([O-])=O)C=C1	A18	O=[N+]([O-])c1ccc(Nc2ncc(C(=O)OC)cc2)cc1
0.370265	CC1=CC(Br)=CC(C)=N1	B43	NC1=CC=C([N+]([O-])=O)C=C1	A18	O=[N+]([O-])c1ccc(Nc2cc(C)nc(C)c2)cc1
0.215249	FC(C1=CC(Br)=NC=C1)(F)F	B44	NC1=CC=C([N+]([O-])=O)C=C1	A18	FC(F)(F)c1cc(Nc2ccc([N+](=O)[O-])cc2)ncc1
0.16985	FC(C1=NC=C(Br)C=C1)(F)F	B45	NC1=CC=C([N+]([O-])=O)C=C1	A18	FC(F)(F)c1ncc(Nc2ccc([N+](=O)[O-])cc2)cc1
0.188993	FC(C1=NC=CC(Br)=C1)(F)F	B46	NC1=CC=C([N+]([O-])=O)C=C1	A18	FC(F)(F)c1nccc(Nc2ccc([N+](=O)[O-])cc2)c1
0.132974	FC(C1=NC=CC=C1Br)(F)F	B47	NC1=CC=C([N+]([O-])=O)C=C1	A18	FC(F)(F)c1c(Nc2ccc([N+](=O)[O-])cc2)cccn1
0.207319	FC(C1=CC=CC(Br)=N1)F	B41	NC1=CC=C(C)C(C)=C1	A49	FC(F)c1nc(Nc2cc(C)c(C)cc2)ccc1
0.169593	FC(C1=NC=CC(Br)=C1)(F)F	B46	NC1=CC=C(C)C(C)=C1	A49	FC(F)(F)c1nccc(Nc2cc(C)c(C)cc2)c1
0.195138	FC(C1=CC=CC(Br)=N1)F	B41	NC1=CC=C(C(C)(C)C)C=C1	A20	FC(F)c1nc(Nc2ccc(C(C)(C)C)cc2)ccc1
0.107053	O=C(OC)C1=CN=C(Br)C=C1	B42	NC1=CC=C(C(C)(C)C)C=C1	A20	O=C(OC)c1cnc(Nc2ccc(C(C)(C)C)cc2)cc1
0.204815	CC1=CC(Br)=CC(C)=N1	B43	NC1=CC=C(C(C)(C)C)C=C1	A20	N(c1cc(C)nc(C)c1)c1ccc(C(C)(C)C)cc1
0.241336	FC(C1=CC(Br)=NC=C1)(F)F	B44	NC1=CC=C(C(C)(C)C)C=C1	A20	FC(F)(F)c1cc(Nc2ccc(C(C)(C)C)cc2)ncc1
0.164939	FC(C1=NC=C(Br)C=C1)(F)F	B45	NC1=CC=C(C(C)(C)C)C=C1	A20	FC(F)(F)c1ncc(Nc2ccc(C(C)(C)C)cc2)cc1
0.170165	FC(C1=NC=CC(Br)=C1)(F)F	B46	NC1=CC=C(C(C)(C)C)C=C1	A20	FC(F)(F)c1nccc(Nc2ccc(C(C)(C)C)cc2)c1
0.11485	FC(C1=NC=CC=C1Br)(F)F	B47	NC1=CC=C(C(C)(C)C)C=C1	A20	FC(F)(F)c1c(Nc2ccc(C(C)(C)C)cc2)cccn1
0.191525	FC(C1=CC=CC(Br)=N1)F	B41	NC1=CC=CC=C1C(F)(F)F	A21	FC(F)(F)c1c(Nc2nc(C(F)F)ccc2)cccc1
0.420593	CC1=CC(Br)=CC(C)=N1	B43	NC1=CC=CC=C1C(F)(F)F	A21	FC(F)(F)c1c(Nc2cc(C)nc(C)c2)cccc1
0.0137181	FC(C1=CC(Br)=NC=C1)(F)F	B44	NC1=CC=CC=C1C(F)(F)F	A21	FC(F)(F)c1c(Nc2nccc(C(F)(F)F)c2)cccc1
0.182036	FC(C1=NC=C(Br)C=C1)(F)F	B45	NC1=CC=CC=C1C(F)(F)F	A21	FC(F)(F)c1c(Nc2cnc(C(F)(F)F)cc2)cccc1
0.155727	FC(C1=NC=CC(Br)=C1)(F)F	B46	NC1=CC=CC=C1C(F)(F)F	A21	FC(F)(F)c1c(Nc2cc(C(F)(F)F)ncc2)cccc1
0.102885	FC(C1=NC=CC=C1Br)(F)F	B47	NC1=CC=CC=C1C(F)(F)F	A21	FC(F)(F)c1c(Nc2c(C(F)(F)F)cccc2)cccn1
0.207813	FC(C1=CC=CC(Br)=N1)F	B41	FC(F)(F)C1=CC=C(N)C=C1	A22	FC(F)(F)c1ccc(Nc2nc(C(F)F)ccc2)cc1
0.0804094	O=C(OC)C1=CN=C(Br)C=C1	B42	FC(F)(F)C1=CC=C(N)C=C1	A22	FC(F)(F)c1ccc(Nc2ncc(C(=O)OC)cc2)cc1
0.153479	CC1=CC(Br)=CC(C)=N1	B43	FC(F)(F)C1=CC=C(N)C=C1	A22	FC(F)(F)c1ccc(Nc2cc(C)nc(C)c2)cc1
0.172039	FC(C1=CC(Br)=NC=C1)(F)F	B44	FC(F)(F)C1=CC=C(N)C=C1	A22	FC(F)(F)c1cc(Nc2ccc(C(F)(F)F)cc2)ncc1
0.130938	FC(C1=NC=C(Br)C=C1)(F)F	B45	FC(F)(F)C1=CC=C(N)C=C1	A22	FC(F)(F)c1ncc(Nc2ccc(C(F)(F)F)cc2)cc1
0.0490521	FC(C1=NC=CC(Br)=C1)(F)F	B46	FC(F)(F)C1=CC=C(N)C=C1	A22	FC(F)(F)c1nccc(Nc2ccc(C(F)(F)F)cc2)c1
0.109458	FC(C1=NC=CC=C1Br)(F)F	B47	FC(F)(F)C1=CC=C(N)C=C1	A22	FC(F)(F)c1c(Nc2ccc(C(F)(F)F)cc2)cccn1
0.296928	FC(C1=CC=CC(Br)=N1)F	B41	O=C(O)C1=CC=C(OC)C(N)=C1	A23	FC(F)c1nc(Nc2c(OC)ccc(C(=O)O)c2)ccc1
0.328526	O=C(OC)C1=CN=C(Br)C=C1	B42	O=C(O)C1=CC=C(OC)C(N)=C1	A23	O=C(OC)c1cnc(Nc2c(OC)ccc(C(=O)O)c2)cc1
0.622057	CC1=CC(Br)=CC(C)=N1	B43	O=C(O)C1=CC=C(OC)C(N)=C1	A23	O=C(O)c1cc(Nc2cc(C)nc(C)c2)c(OC)cc1
0.302793	FC(C1=CC(Br)=NC=C1)(F)F	B44	O=C(O)C1=CC=C(OC)C(N)=C1	A23	FC(F)(F)c1cc(Nc2c(OC)ccc(C(=O)O)c2)ncc1
0.272743	FC(C1=NC=C(Br)C=C1)(F)F	B45	O=C(O)C1=CC=C(OC)C(N)=C1	A23	FC(F)(F)c1ncc(Nc2c(OC)ccc(C(=O)O)c2)cc1
0.339736	FC(C1=NC=CC(Br)=C1)(F)F	B46	O=C(O)C1=CC=C(OC)C(N)=C1	A23	FC(F)(F)c1nccc(Nc2c(OC)ccc(C(=O)O)c2)c1
0.0178932	FC(C1=NC=CC=C1Br)(F)F	B47	O=C(O)C1=CC=C(OC)C(N)=C1	A23	FC(F)(F)c1c(Nc2c(OC)ccc(C(=O)O)c2)cccn1
0.0738859	O=C(OC)C1=CN=C(Br)C=C1	B42	O=C(O)C1=CC=C([N+]([O-])=O)C(N)=C1	A24	O=[N+]([O-])c1c(Nc2ncc(C(=O)OC)cc2)cc(C(=O)O)cc1
0.338266	CC1=CC(Br)=CC(C)=N1	B43	O=C(O)C1=CC=C([N+]([O-])=O)C(N)=C1	A24	O=[N+]([O-])c1c(Nc2cc(C)nc(C)c2)cc(C(=O)O)cc1
0.225509	FC(C1=CC(Br)=NC=C1)(F)F	B44	O=C(O)C1=CC=C([N+]([O-])=O)C(N)=C1	A24	FC(F)(F)c1cc(Nc2c([N+](=O)[O-])ccc(C(=O)O)c2)ncc1
0.229784	FC(C1=NC=C(Br)C=C1)(F)F	B45	O=C(O)C1=CC=C([N+]([O-])=O)C(N)=C1	A24	FC(F)(F)c1ncc(Nc2c([N+](=O)[O-])ccc(C(=O)O)c2)cc1
0.162073	FC(C1=NC=CC(Br)=C1)(F)F	B46	O=C(O)C1=CC=C([N+]([O-])=O)C(N)=C1	A24	FC(F)(F)c1nccc(Nc2c([N+](=O)[O-])ccc(C(=O)O)c2)c1
0.196834	FC(C1=NC=CC=C1Br)(F)F	B47	O=C(O)C1=CC=C([N+]([O-])=O)C(N)=C1	A24	FC(F)(F)c1c(Nc2c([N+](=O)[O-])ccc(C(=O)O)c2)cccn1
0.117626	OC1=CC=CC=C1Br	B02	CC1=CN=C(N)C=C1	A25	Oc1c(Nc2ncc(C)cc2)cccc1
0.230955	CC1=CC=C(Br)C=C1	B01	CC1=C(N)C=NC=C1	A26	N(c1c(C)ccnc1)c1ccc(C)cc1
0.00911623	OC1=CC=CC=C1Br	B02	CC1=C(N)C=NC=C1	A26	Oc1c(Nc2c(C)ccnc2)cccc1
0.100934	FC1=CC=CC=C1Br	B03	CC1=C(N)C=NC=C1	A26	Fc1c(Nc2c(C)ccnc2)cccc1
0.256845	N#CC1=CC=C(Br)C=C1	B04	CC1=C(N)C=NC=C1	A26	N#Cc1ccc(Nc2c(C)ccnc2)cc1
0.133828	FC1=CC(Br)=CC=C1	B05	CC1=C(N)C=NC=C1	A26	Fc1cc(Nc2c(C)ccnc2)ccc1
0.284481	CC1=CC=C(Br)C=C1C	B06	CC1=C(N)C=NC=C1	A26	N(c1c(C)ccnc1)c1cc(C)c(C)cc1
0.182665	COC1=CC(Br)=CC=C1	B07	CC1=C(N)C=NC=C1	A26	O(C)c1cc(Nc2c(C)ccnc2)ccc1
0.102491	OCC1=CC=CC(Br)=C1	B08	CC1=C(N)C=NC=C1	A26	OCc1cc(Nc2c(C)ccnc2)ccc1
0.115634	CC1=CC=C(Br)C=C1	B01	CC1=NC=CC(N)=C1	A27	N(c1cc(C)ncc1)c1ccc(C)cc1
0.00985466	OC1=CC=CC=C1Br	B02	CC1=NC=CC(N)=C1	A27	Oc1c(Nc2cc(C)ncc2)cccc1
0.160806	FC1=CC=CC=C1Br	B03	CC1=NC=CC(N)=C1	A27	Fc1c(Nc2cc(C)ncc2)cccc1
0.0911526	N#CC1=CC=C(Br)C=C1	B04	CC1=NC=CC(N)=C1	A27	N#Cc1ccc(Nc2cc(C)ncc2)cc1
0.113026	FC1=CC(Br)=CC=C1	B05	CC1=NC=CC(N)=C1	A27	Fc1cc(Nc2cc(C)ncc2)ccc1
0.114961	CC1=CC=C(Br)C=C1C	B06	CC1=NC=CC(N)=C1	A27	N(c1cc(C)c(C)cc1)c1cc(C)ncc1
0.14182	COC1=CC(Br)=CC=C1	B07	CC1=NC=CC(N)=C1	A27	O(C)c1cc(Nc2cc(C)ncc2)ccc1
0.0769014	OCC1=CC=CC(Br)=C1	B08	CC1=NC=CC(N)=C1	A27	OCc1cc(Nc2cc(C)ncc2)ccc1
0.374025	CC1=CC=C(Br)C=C1	B01	FC1=CC=CC(N)=N1	A28	Fc1nc(Nc2ccc(C)cc2)ccc1
0.0649749	OC1=CC=CC=C1Br	B02	FC1=CC=CC(N)=N1	A28	Fc1nc(Nc2c(O)cccc2)ccc1
0.0898959	N#CC1=CC=C(Br)C=C1	B04	FC1=CC=CC(N)=N1	A28	Fc1nc(Nc2ccc(C#N)cc2)ccc1
0.3553	CC1=CC=C(Br)C=C1C	B06	FC1=CC=CC(N)=N1	A28	Fc1nc(Nc2cc(C)c(C)cc2)ccc1
0.429372	COC1=CC(Br)=CC=C1	B07	FC1=CC=CC(N)=N1	A28	Fc1nc(Nc2cc(OC)ccc2)ccc1
0.409547	OCC1=CC=CC(Br)=C1	B08	FC1=CC=CC(N)=N1	A28	Fc1nc(Nc2cc(CO)ccc2)ccc1
0.0985253	CC1=CC=C(Br)C=C1	B01	FC1=NC=C(N)C=C1	A29	Fc1ncc(Nc2ccc(C)cc2)cc1
0.0204883	OC1=CC=CC=C1Br	B02	FC1=NC=C(N)C=C1	A29	Fc1ncc(Nc2c(O)cccc2)cc1
0.107165	FC1=CC=CC=C1Br	B03	FC1=NC=C(N)C=C1	A29	Fc1c(Nc2cnc(F)cc2)cccc1
0.0936376	N#CC1=CC=C(Br)C=C1	B04	FC1=NC=C(N)C=C1	A29	Fc1ncc(Nc2ccc(C#N)cc2)cc1
0.109858	FC1=CC(Br)=CC=C1	B05	FC1=NC=C(N)C=C1	A29	Fc1ncc(Nc2cc(F)ccc2)cc1
0.115203	CC1=CC=C(Br)C=C1C	B06	FC1=NC=C(N)C=C1	A29	Fc1ncc(Nc2cc(C)c(C)cc2)cc1
0.102157	COC1=CC(Br)=CC=C1	B07	FC1=NC=C(N)C=C1	A29	Fc1ncc(Nc2cc(OC)ccc2)cc1
0.0369895	OCC1=CC=CC(Br)=C1	B08	FC1=NC=C(N)C=C1	A29	Fc1ncc(Nc2cc(CO)ccc2)cc1
0.273856	CC1=CC=C(Br)C=C1	B01	FC1=C(N)C=CN=C1	A30	Fc1c(Nc2ccc(C)cc2)ccnc1
0.301319	FC1=CC=CC=C1Br	B03	FC1=C(N)C=CN=C1	A30	Fc1c(Nc2c(F)cccc2)ccnc1
0.0940525	N#CC1=CC=C(Br)C=C1	B04	FC1=C(N)C=CN=C1	A30	Fc1c(Nc2ccc(C#N)cc2)ccnc1
0.235872	FC1=CC(Br)=CC=C1	B05	FC1=C(N)C=CN=C1	A30	Fc1c(Nc2cc(F)ccc2)ccnc1
0.285619	CC1=CC=C(Br)C=C1C	B06	FC1=C(N)C=CN=C1	A30	Fc1c(Nc2cc(C)c(C)cc2)ccnc1
0.334131	COC1=CC(Br)=CC=C1	B07	FC1=C(N)C=CN=C1	A30	Fc1c(Nc2cc(OC)ccc2)ccnc1
0.255868	OCC1=CC=CC(Br)=C1	B08	FC1=C(N)C=CN=C1	A30	Fc1c(Nc2cc(CO)ccc2)ccnc1
0.0326222	OC1=CC=CC=C1Br	B02	N#CC1=CC(N)=NC=C1	A31	Oc1c(Nc2nccc(C#N)c2)cccc1
0.146655	FC1=CC=CC=C1Br	B03	N#CC1=CC(N)=NC=C1	A31	Fc1c(Nc2nccc(C#N)c2)cccc1
0.262988	FC1=CC(Br)=CC=C1	B05	N#CC1=CC(N)=NC=C1	A31	Fc1cc(Nc2nccc(C#N)c2)ccc1
0.270104	CC1=CC=C(Br)C=C1C	B06	N#CC1=CC(N)=NC=C1	A31	N#Cc1cc(Nc2cc(C)c(C)cc2)ncc1
0.215102	COC1=CC(Br)=CC=C1	B07	N#CC1=CC(N)=NC=C1	A31	O(C)c1cc(Nc2nccc(C#N)c2)ccc1
0.259532	OCC1=CC=CC(Br)=C1	B08	N#CC1=CC(N)=NC=C1	A31	OCc1cc(Nc2nccc(C#N)c2)ccc1
0.166089	CC1=CC=C(Br)C=C1	B01	N#CC1=NC=CC(N)=C1	A32	N#Cc1nccc(Nc2ccc(C)cc2)c1
0.053282	OC1=CC=CC=C1Br	B02	N#CC1=NC=CC(N)=C1	A32	Oc1c(Nc2cc(C#N)ncc2)cccc1
0.218567	FC1=CC=CC=C1Br	B03	N#CC1=NC=CC(N)=C1	A32	Fc1c(Nc2cc(C#N)ncc2)cccc1
0.250464	N#CC1=CC=C(Br)C=C1	B04	N#CC1=NC=CC(N)=C1	A32	N#Cc1nccc(Nc2ccc(C#N)cc2)c1
0.143435	FC1=CC(Br)=CC=C1	B05	N#CC1=NC=CC(N)=C1	A32	Fc1cc(Nc2cc(C#N)ncc2)ccc1
0.194441	CC1=CC=C(Br)C=C1C	B06	N#CC1=NC=CC(N)=C1	A32	N#Cc1nccc(Nc2cc(C)c(C)cc2)c1
0.241365	COC1=CC(Br)=CC=C1	B07	N#CC1=NC=CC(N)=C1	A32	O(C)c1cc(Nc2cc(C#N)ncc2)ccc1
0.178525	OCC1=CC=CC(Br)=C1	B08	N#CC1=NC=CC(N)=C1	A32	OCc1cc(Nc2cc(C#N)ncc2)ccc1
0.342055	CC1=CC=C(Br)C=C1	B01	CC1=CC(C)=C(N)C=N1	A33	N(c1c(C)cc(C)nc1)c1ccc(C)cc1
0.00396341	OC1=CC=CC=C1Br	B02	CC1=CC(C)=C(N)C=N1	A33	Oc1c(Nc2c(C)cc(C)nc2)cccc1
0.266789	FC1=CC=CC=C1Br	B03	CC1=CC(C)=C(N)C=N1	A33	Fc1c(Nc2c(C)cc(C)nc2)cccc1
0.300743	N#CC1=CC=C(Br)C=C1	B04	CC1=CC(C)=C(N)C=N1	A33	N#Cc1ccc(Nc2c(C)cc(C)nc2)cc1
0.243199	FC1=CC(Br)=CC=C1	B05	CC1=CC(C)=C(N)C=N1	A33	Fc1cc(Nc2c(C)cc(C)nc2)ccc1
0.384805	CC1=CC=C(Br)C=C1C	B06	CC1=CC(C)=C(N)C=N1	A33	N(c1c(C)cc(C)nc1)c1cc(C)c(C)cc1
0.375345	COC1=CC(Br)=CC=C1	B07	CC1=CC(C)=C(N)C=N1	A33	O(C)c1cc(Nc2c(C)cc(C)nc2)ccc1
0.180325	OCC1=CC=CC(Br)=C1	B08	CC1=CC(C)=C(N)C=N1	A33	OCc1cc(Nc2c(C)cc(C)nc2)ccc1
0.0229971	CC1=CC=C(Br)C=C1	B01	O=CC1=C(N)C=NC=C1	A34	O=Cc1c(Nc2ccc(C)cc2)cncc1
0.00535786	OC1=CC=CC=C1Br	B02	O=CC1=C(N)C=NC=C1	A34	O=Cc1c(Nc2c(O)cccc2)cncc1
0.00346072	FC1=CC=CC=C1Br	B03	O=CC1=C(N)C=NC=C1	A34	Fc1c(Nc2c(C=O)ccnc2)cccc1
0.0126327	N#CC1=CC=C(Br)C=C1	B04	O=CC1=C(N)C=NC=C1	A34	O=Cc1c(Nc2ccc(C#N)cc2)cncc1
0.0103502	CC1=CC=C(Br)C=C1C	B06	O=CC1=C(N)C=NC=C1	A34	O=Cc1c(Nc2cc(C)c(C)cc2)cncc1
0.0203322	COC1=CC(Br)=CC=C1	B07	O=CC1=C(N)C=NC=C1	A34	O=Cc1c(Nc2cc(OC)ccc2)cncc1
0.0507543	OCC1=CC=CC(Br)=C1	B08	O=CC1=C(N)C=NC=C1	A34	O=Cc1c(Nc2cc(CO)ccc2)cncc1
0.201393	CC1=CC=C(Br)C=C1	B01	COC1=NC=C(N)C=C1	A35	O(C)c1ncc(Nc2ccc(C)cc2)cc1
0.00985626	OC1=CC=CC=C1Br	B02	COC1=NC=C(N)C=C1	A35	O(C)c1ncc(Nc2c(O)cccc2)cc1
0.333079	FC1=CC=CC=C1Br	B03	COC1=NC=C(N)C=C1	A35	Fc1c(Nc2cnc(OC)cc2)cccc1
0.120288	N#CC1=CC=C(Br)C=C1	B04	COC1=NC=C(N)C=C1	A35	O(C)c1ncc(Nc2ccc(C#N)cc2)cc1
0.263861	FC1=CC(Br)=CC=C1	B05	COC1=NC=C(N)C=C1	A35	Fc1cc(Nc2cnc(OC)cc2)ccc1
0.259413	CC1=CC=C(Br)C=C1C	B06	COC1=NC=C(N)C=C1	A35	O(C)c1ncc(Nc2cc(C)c(C)cc2)cc1
0.356415	COC1=CC(Br)=CC=C1	B07	COC1=NC=C(N)C=C1	A35	O(C)c1ncc(Nc2cc(OC)ccc2)cc1
0.293107	OCC1=CC=CC(Br)=C1	B08	COC1=NC=C(N)C=C1	A35	O(C)c1ncc(Nc2cc(CO)ccc2)cc1
0.0525441	CC1=CC=C(Br)C=C1	B01	N#CCC1=NC=CC=C1N	A36	N#CCc1c(Nc2ccc(C)cc2)cccn1
0.0613107	OC1=CC=CC=C1Br	B02	N#CCC1=NC=CC=C1N	A36	Oc1c(Nc2c(CC#N)nccc2)cccc1
0.0113011	FC1=CC=CC=C1Br	B03	N#CCC1=NC=CC=C1N	A36	Fc1c(Nc2c(CC#N)nccc2)cccc1
0.0222356	N#CC1=CC=C(Br)C=C1	B04	N#CCC1=NC=CC=C1N	A36	N#CCc1c(Nc2ccc(C#N)cc2)cccn1
0.0111648	COC1=CC(Br)=CC=C1	B07	N#CCC1=NC=CC=C1N	A36	O(C)c1cc(Nc2c(CC#N)nccc2)ccc1
0.00196965	OCC1=CC=CC(Br)=C1	B08	N#CCC1=NC=CC=C1N	A36	OCc1cc(Nc2c(CC#N)nccc2)ccc1
0.0420801	OC1=CC=CC=C1Br	B02	O=C(C1=CC=CN=C1N)C	A37	O=C(C)c1c(Nc2c(O)cccc2)nccc1
0.149023	FC1=CC=CC=C1Br	B03	O=C(C1=CC=CN=C1N)C	A37	Fc1c(Nc2c(C(=O)C)cccn2)cccc1
0.0886055	N#CC1=CC=C(Br)C=C1	B04	O=C(C1=CC=CN=C1N)C	A37	O=C(C)c1c(Nc2ccc(C#N)cc2)nccc1
0.10921	FC1=CC(Br)=CC=C1	B05	O=C(C1=CC=CN=C1N)C	A37	Fc1cc(Nc2c(C(=O)C)cccn2)ccc1
0.187515	CC1=CC=C(Br)C=C1C	B06	O=C(C1=CC=CN=C1N)C	A37	O=C(C)c1c(Nc2cc(C)c(C)cc2)nccc1
0.26009	COC1=CC(Br)=CC=C1	B07	O=C(C1=CC=CN=C1N)C	A37	O=C(C)c1c(Nc2cc(OC)ccc2)nccc1
0.248116	OCC1=CC=CC(Br)=C1	B08	O=C(C1=CC=CN=C1N)C	A37	O=C(C)c1c(Nc2cc(CO)ccc2)nccc1
0.0191621	OC1=CC=CC=C1Br	B02	CCOC1=NC=CC(N)=C1	A38	O(CC)c1nccc(Nc2c(O)cccc2)c1
0.298834	FC1=CC=CC=C1Br	B03	CCOC1=NC=CC(N)=C1	A38	Fc1c(Nc2cc(OCC)ncc2)cccc1
0.210959	N#CC1=CC=C(Br)C=C1	B04	CCOC1=NC=CC(N)=C1	A38	O(CC)c1nccc(Nc2ccc(C#N)cc2)c1
0.197919	FC1=CC(Br)=CC=C1	B05	CCOC1=NC=CC(N)=C1	A38	Fc1cc(Nc2cc(OCC)ncc2)ccc1
0.216479	CC1=CC=C(Br)C=C1C	B06	CCOC1=NC=CC(N)=C1	A38	O(CC)c1nccc(Nc2cc(C)c(C)cc2)c1
0.237988	COC1=CC(Br)=CC=C1	B07	CCOC1=NC=CC(N)=C1	A38	O(CC)c1nccc(Nc2cc(OC)ccc2)c1
0.155763	OCC1=CC=CC(Br)=C1	B08	CCOC1=NC=CC(N)=C1	A38	O(CC)c1nccc(Nc2cc(CO)ccc2)c1
0.223637	CC1=CC=C(Br)C=C1	B01	CCOC1=CC(N)=NC=C1	A39	O(CC)c1cc(Nc2ccc(C)cc2)ncc1
0.051572	OC1=CC=CC=C1Br	B02	CCOC1=CC(N)=NC=C1	A39	O(CC)c1cc(Nc2c(O)cccc2)ncc1
0.129826	FC1=CC=CC=C1Br	B03	CCOC1=CC(N)=NC=C1	A39	Fc1c(Nc2nccc(OCC)c2)cccc1
0.136649	N#CC1=CC=C(Br)C=C1	B04	CCOC1=CC(N)=NC=C1	A39	O(CC)c1cc(Nc2ccc(C#N)cc2)ncc1
0.226869	FC1=CC(Br)=CC=C1	B05	CCOC1=CC(N)=NC=C1	A39	Fc1cc(Nc2nccc(OCC)c2)ccc1
0.244739	CC1=CC=C(Br)C=C1C	B06	CCOC1=CC(N)=NC=C1	A39	O(CC)c1cc(Nc2cc(C)c(C)cc2)ncc1
0.217948	COC1=CC(Br)=CC=C1	B07	CCOC1=CC(N)=NC=C1	A39	O(CC)c1cc(Nc2cc(OC)ccc2)ncc1
0.291372	OCC1=CC=CC(Br)=C1	B08	CCOC1=CC(N)=NC=C1	A39	O(CC)c1cc(Nc2cc(CO)ccc2)ncc1
0.0561264	FC1=CC=CC=C1Br	B03	O=[N+](C1=CN=C(N)C=C1)[O-]	A40	Fc1c(Nc2ncc([N+](=O)[O-])cc2)cccc1
0.144376	N#CC1=CC=C(Br)C=C1	B04	O=[N+](C1=CN=C(N)C=C1)[O-]	A40	O=[N+]([O-])c1cnc(Nc2ccc(C#N)cc2)cc1
0.314672	CC1=CC=C(Br)C=C1C	B06	O=[N+](C1=CN=C(N)C=C1)[O-]	A40	O=[N+]([O-])c1cnc(Nc2cc(C)c(C)cc2)cc1
0.14396	COC1=CC(Br)=CC=C1	B07	O=[N+](C1=CN=C(N)C=C1)[O-]	A40	O=[N+]([O-])c1cnc(Nc2cc(OC)ccc2)cc1
0.3214	OCC1=CC=CC(Br)=C1	B08	O=[N+](C1=CN=C(N)C=C1)[O-]	A40	O=[N+]([O-])c1cnc(Nc2cc(CO)ccc2)cc1
0.158359	FC1=CC=CC=C1Br	B03	O=C(OC)C1=CC=NC=C1N	A41	Fc1c(Nc2c(C(=O)OC)ccnc2)cccc1
0.102354	N#CC1=CC=C(Br)C=C1	B04	O=C(OC)C1=CC=NC=C1N	A41	O=C(OC)c1c(Nc2ccc(C#N)cc2)cncc1
0.116598	FC1=CC(Br)=CC=C1	B05	O=C(OC)C1=CC=NC=C1N	A41	Fc1cc(Nc2c(C(=O)OC)ccnc2)ccc1
0.222496	COC1=CC(Br)=CC=C1	B07	O=C(OC)C1=CC=NC=C1N	A41	O=C(OC)c1c(Nc2cc(OC)ccc2)cncc1
0.108338	OCC1=CC=CC(Br)=C1	B08	O=C(OC)C1=CC=NC=C1N	A41	O=C(OC)c1c(Nc2cc(CO)ccc2)cncc1
0.0520514	OC1=CC=CC=C1Br	B02	O=C(C1=C(N)C=CN=C1)OC	A42	O=C(OC)c1c(Nc2c(O)cccc2)ccnc1
0.157914	FC1=CC=CC=C1Br	B03	O=C(C1=C(N)C=CN=C1)OC	A42	Fc1c(Nc2c(C(=O)OC)cncc2)cccc1
0.117979	N#CC1=CC=C(Br)C=C1	B04	O=C(C1=C(N)C=CN=C1)OC	A42	O=C(OC)c1c(Nc2ccc(C#N)cc2)ccnc1
0.131818	FC1=CC(Br)=CC=C1	B05	O=C(C1=C(N)C=CN=C1)OC	A42	Fc1cc(Nc2c(C(=O)OC)cncc2)ccc1
0.161443	CC1=CC=C(Br)C=C1C	B06	O=C(C1=C(N)C=CN=C1)OC	A42	O=C(OC)c1c(Nc2cc(C)c(C)cc2)ccnc1
0.0610622	COC1=CC(Br)=CC=C1	B07	O=C(C1=C(N)C=CN=C1)OC	A42	O=C(OC)c1c(Nc2cc(OC)ccc2)ccnc1
0.104066	FC1=CC(Br)=CC=C1	B05	O=C(C1=NC=CC(N)=C1)OC	A43	Fc1cc(Nc2cc(C(=O)OC)ncc2)ccc1
0.19193	COC1=CC(Br)=CC=C1	B07	O=C(C1=NC=CC(N)=C1)OC	A43	O=C(OC)c1nccc(Nc2cc(OC)ccc2)c1
0.0423871	OCC1=CC=CC(Br)=C1	B08	O=C(C1=NC=CC(N)=C1)OC	A43	O=C(OC)c1nccc(Nc2cc(CO)ccc2)c1
0.133555	OC1=CC=CC=C1Br	B02	O=C(OC)C1=CC=NC(N)=C1	A44	O=C(OC)c1cc(Nc2c(O)cccc2)ncc1
0.162056	FC1=CC=CC=C1Br	B03	O=C(OC)C1=CC=NC(N)=C1	A44	Fc1c(Nc2nccc(C(=O)OC)c2)cccc1
0.0583277	N#CC1=CC=C(Br)C=C1	B04	O=C(OC)C1=CC=NC(N)=C1	A44	O=C(OC)c1cc(Nc2ccc(C#N)cc2)ncc1
0.290009	COC1=CC(Br)=CC=C1	B07	O=C(OC)C1=CC=NC(N)=C1	A44	O=C(OC)c1cc(Nc2cc(OC)ccc2)ncc1
0.244011	OCC1=CC=CC(Br)=C1	B08	O=C(OC)C1=CC=NC(N)=C1	A44	O=C(OC)c1cc(Nc2cc(CO)ccc2)ncc1
0.041087	OC1=CC=CC=C1Br	B02	NC1=NC=C(C(F)(F)F)C=C1	A45	FC(F)(F)c1cnc(Nc2c(O)cccc2)cc1
0.0393868	N#CC1=CC=C(Br)C=C1	B04	NC1=NC=C(C(F)(F)F)C=C1	A45	FC(F)(F)c1cnc(Nc2ccc(C#N)cc2)cc1
0.160774	COC1=CC(Br)=CC=C1	B07	NC1=NC=C(C(F)(F)F)C=C1	A45	FC(F)(F)c1cnc(Nc2cc(OC)ccc2)cc1
0.186504	OCC1=CC=CC(Br)=C1	B08	NC1=NC=C(C(F)(F)F)C=C1	A45	FC(F)(F)c1cnc(Nc2cc(CO)ccc2)cc1
0.156303	N#CC1=CC=C(Br)C=C1	B04	FC(C1=NC=C(N)C=C1)(F)F	A46	FC(F)(F)c1ncc(Nc2ccc(C#N)cc2)cc1
0.135913	OCC1=CC=CC(Br)=C1	B08	FC(C1=NC=C(N)C=C1)(F)F	A46	FC(F)(F)c1ncc(Nc2cc(CO)ccc2)cc1
0.0800704	N#CC1=CC=C(Br)C=C1	B04	FC(C1=NC=CC(N)=C1)(F)F	A47	FC(F)(F)c1nccc(Nc2ccc(C#N)cc2)c1
0.263222	COC1=CC(Br)=CC=C1	B07	FC(C1=NC=CC(N)=C1)(F)F	A47	FC(F)(F)c1nccc(Nc2cc(OC)ccc2)c1
0.17387	OCC1=CC=CC(Br)=C1	B08	FC(C1=NC=CC(N)=C1)(F)F	A47	FC(F)(F)c1nccc(Nc2cc(CO)ccc2)c1
0.249265	N#CC1=CC=C(Br)C=C1	B04	O=C(OCC)C1=NC=CC(N)=C1	A48	O=C(OCC)c1nccc(Nc2ccc(C#N)cc2)c1
0.183652	COC1=CC(Br)=CC=C1	B07	O=C(OCC)C1=NC=CC(N)=C1	A48	O=C(OCC)c1nccc(Nc2cc(OC)ccc2)c1
0.0550083	OCC1=CC=CC(Br)=C1	B08	O=C(OCC)C1=NC=CC(N)=C1	A48	O=C(OCC)c1nccc(Nc2cc(CO)ccc2)c1
0.0193269	CC(C1=CC=CC=C1Br)=O	B10	CC1=CN=C(N)C=C1	A25	O=C(C)c1c(Nc2ncc(C)cc2)cccc1
0.247255	CN(C)C1=CC=CC=C1Br	B12	CC1=CN=C(N)C=C1	A25	N(C)(C)c1c(Nc2ncc(C)cc2)cccc1
0.0942504	FC1=CC=C(Br)C(F)=C1	B09	CC1=C(N)C=NC=C1	A26	Fc1c(Nc2c(C)ccnc2)ccc(F)c1
0.232749	CC(C1=CC=C(Br)C=C1)C	B11	CC1=C(N)C=NC=C1	A26	N(c1c(C)ccnc1)c1ccc(C(C)C)cc1
0.00374592	CN(C)C1=CC=CC=C1Br	B12	CC1=C(N)C=NC=C1	A26	N(C)(C)c1c(Nc2c(C)ccnc2)cccc1
0.431031	BrC1=CC([N+]([O-])=O)=CC=C1	B13	CC1=C(N)C=NC=C1	A26	O=[N+]([O-])c1cc(Nc2c(C)ccnc2)ccc1
0.244113	CCCCC1=CC=C(Br)C=C1	B14	CC1=C(N)C=NC=C1	A26	N(c1c(C)ccnc1)c1ccc(CCCC)cc1
0.0055582	O=C(OC)C1=CC=CC=C1Br	B15	CC1=C(N)C=NC=C1	A26	O=C(OC)c1c(Nc2c(C)ccnc2)cccc1
0.0869964	O=C(OC)C1=CC=C(Br)C=C1	B16	CC1=C(N)C=NC=C1	A26	O=C(OC)c1ccc(Nc2c(C)ccnc2)cc1
0.139285	FC1=CC=C(Br)C(F)=C1	B09	CC1=NC=CC(N)=C1	A27	Fc1c(Nc2cc(C)ncc2)ccc(F)c1
0.00145288	CC(C1=CC=CC=C1Br)=O	B10	CC1=NC=CC(N)=C1	A27	O=C(C)c1c(Nc2cc(C)ncc2)cccc1
0.107026	CC(C1=CC=C(Br)C=C1)C	B11	CC1=NC=CC(N)=C1	A27	N(c1cc(C)ncc1)c1ccc(C(C)C)cc1
0.0376833	CN(C)C1=CC=CC=C1Br	B12	CC1=NC=CC(N)=C1	A27	N(C)(C)c1c(Nc2cc(C)ncc2)cccc1
0.36357	BrC1=CC([N+]([O-])=O)=CC=C1	B13	CC1=NC=CC(N)=C1	A27	O=[N+]([O-])c1cc(Nc2cc(C)ncc2)ccc1
0.117577	CCCCC1=CC=C(Br)C=C1	B14	CC1=NC=CC(N)=C1	A27	N(c1cc(C)ncc1)c1ccc(CCCC)cc1
0.0575795	O=C(OC)C1=CC=CC=C1Br	B15	CC1=NC=CC(N)=C1	A27	O=C(OC)c1c(Nc2cc(C)ncc2)cccc1
0.145384	O=C(OC)C1=CC=C(Br)C=C1	B16	CC1=NC=CC(N)=C1	A27	O=C(OC)c1ccc(Nc2cc(C)ncc2)cc1
0.00281617	CC(C1=CC=CC=C1Br)=O	B10	FC1=CC=CC(N)=N1	A28	Fc1nc(Nc2c(C(=O)C)cccc2)ccc1
0.357895	CC(C1=CC=C(Br)C=C1)C	B11	FC1=CC=CC(N)=N1	A28	Fc1nc(Nc2ccc(C(C)C)cc2)ccc1
0.0916948	CN(C)C1=CC=CC=C1Br	B12	FC1=CC=CC(N)=N1	A28	Fc1nc(Nc2c(N(C)C)cccc2)ccc1
0.421793	CCCCC1=CC=C(Br)C=C1	B14	FC1=CC=CC(N)=N1	A28	Fc1nc(Nc2ccc(CCCC)cc2)ccc1
0.120921	O=C(OC)C1=CC=CC=C1Br	B15	FC1=CC=CC(N)=N1	A28	Fc1nc(Nc2c(C(=O)OC)cccc2)ccc1
0.0661572	O=C(OC)C1=CC=C(Br)C=C1	B16	FC1=CC=CC(N)=N1	A28	Fc1nc(Nc2ccc(C(=O)OC)cc2)ccc1
0.0261169	FC1=CC=C(Br)C(F)=C1	B09	FC1=NC=C(N)C=C1	A29	Fc1c(Nc2cnc(F)cc2)ccc(F)c1
0.0692406	CN(C)C1=CC=CC=C1Br	B12	FC1=NC=C(N)C=C1	A29	Fc1ncc(Nc2c(N(C)C)cccc2)cc1
0.108827	CCCCC1=CC=C(Br)C=C1	B14	FC1=NC=C(N)C=C1	A29	Fc1ncc(Nc2ccc(CCCC)cc2)cc1
0.0040633	O=C(OC)C1=CC=CC=C1Br	B15	FC1=NC=C(N)C=C1	A29	Fc1ncc(Nc2c(C(=O)OC)cccc2)cc1
0.158565	O=C(OC)C1=CC=C(Br)C=C1	B16	FC1=NC=C(N)C=C1	A29	Fc1ncc(Nc2ccc(C(=O)OC)cc2)cc1
0.359628	FC1=CC=C(Br)C(F)=C1	B09	FC1=C(N)C=CN=C1	A30	Fc1c(Nc2c(F)cncc2)ccc(F)c1
0.0233698	CC(C1=CC=CC=C1Br)=O	B10	FC1=C(N)C=CN=C1	A30	Fc1c(Nc2c(C(=O)C)cccc2)ccnc1
0.233263	CC(C1=CC=C(Br)C=C1)C	B11	FC1=C(N)C=CN=C1	A30	Fc1c(Nc2ccc(C(C)C)cc2)ccnc1
0.0985364	CN(C)C1=CC=CC=C1Br	B12	FC1=C(N)C=CN=C1	A30	Fc1c(Nc2c(N(C)C)cccc2)ccnc1
0.572275	BrC1=CC([N+]([O-])=O)=CC=C1	B13	FC1=C(N)C=CN=C1	A30	Fc1c(Nc2cc([N+](=O)[O-])ccc2)ccnc1
0.221636	CCCCC1=CC=C(Br)C=C1	B14	FC1=C(N)C=CN=C1	A30	Fc1c(Nc2ccc(CCCC)cc2)ccnc1
0.0906132	O=C(OC)C1=CC=C(Br)C=C1	B16	FC1=C(N)C=CN=C1	A30	Fc1c(Nc2ccc(C(=O)OC)cc2)ccnc1
0.0016767	CC(C1=CC=CC=C1Br)=O	B10	N#CC1=CC(N)=NC=C1	A31	O=C(C)c1c(Nc2nccc(C#N)c2)cccc1
0.248988	CC(C1=CC=C(Br)C=C1)C	B11	N#CC1=CC(N)=NC=C1	A31	N#Cc1cc(Nc2ccc(C(C)C)cc2)ncc1
0.233705	CN(C)C1=CC=CC=C1Br	B12	N#CC1=CC(N)=NC=C1	A31	N#Cc1cc(Nc2c(N(C)C)cccc2)ncc1
0.409186	BrC1=CC([N+]([O-])=O)=CC=C1	B13	N#CC1=CC(N)=NC=C1	A31	O=[N+]([O-])c1cc(Nc2nccc(C#N)c2)ccc1
0.257899	CCCCC1=CC=C(Br)C=C1	B14	N#CC1=CC(N)=NC=C1	A31	N#Cc1cc(Nc2ccc(CCCC)cc2)ncc1
0.00479516	O=C(OC)C1=CC=CC=C1Br	B15	N#CC1=CC(N)=NC=C1	A31	O=C(OC)c1c(Nc2nccc(C#N)c2)cccc1
0.133178	FC1=CC=C(Br)C(F)=C1	B09	N#CC1=NC=CC(N)=C1	A32	Fc1c(Nc2cc(C#N)ncc2)ccc(F)c1
0.0848273	CC(C1=CC=CC=C1Br)=O	B10	N#CC1=NC=CC(N)=C1	A32	O=C(C)c1c(Nc2cc(C#N)ncc2)cccc1
0.185152	CC(C1=CC=C(Br)C=C1)C	B11	N#CC1=NC=CC(N)=C1	A32	N#Cc1nccc(Nc2ccc(C(C)C)cc2)c1
0.0886608	CN(C)C1=CC=CC=C1Br	B12	N#CC1=NC=CC(N)=C1	A32	N#Cc1nccc(Nc2c(N(C)C)cccc2)c1
0.390949	BrC1=CC([N+]([O-])=O)=CC=C1	B13	N#CC1=NC=CC(N)=C1	A32	O=[N+]([O-])c1cc(Nc2cc(C#N)ncc2)ccc1
0.180206	CCCCC1=CC=C(Br)C=C1	B14	N#CC1=NC=CC(N)=C1	A32	N#Cc1nccc(Nc2ccc(CCCC)cc2)c1
0.0511717	O=C(OC)C1=CC=CC=C1Br	B15	N#CC1=NC=CC(N)=C1	A32	O=C(OC)c1c(Nc2cc(C#N)ncc2)cccc1
0.204646	O=C(OC)C1=CC=C(Br)C=C1	B16	N#CC1=NC=CC(N)=C1	A32	O=C(OC)c1ccc(Nc2cc(C#N)ncc2)cc1
0.307351	FC1=CC=C(Br)C(F)=C1	B09	CC1=CC(C)=C(N)C=N1	A33	Fc1c(Nc2c(C)cc(C)nc2)ccc(F)c1
0.000485018	CC(C1=CC=CC=C1Br)=O	B10	CC1=CC(C)=C(N)C=N1	A33	O=C(C)c1c(Nc2c(C)cc(C)nc2)cccc1
0.32632	CC(C1=CC=C(Br)C=C1)C	B11	CC1=CC(C)=C(N)C=N1	A33	N(c1c(C)cc(C)nc1)c1ccc(C(C)C)cc1
0.0844672	CN(C)C1=CC=CC=C1Br	B12	CC1=CC(C)=C(N)C=N1	A33	N(C)(C)c1c(Nc2c(C)cc(C)nc2)cccc1
0.5524	BrC1=CC([N+]([O-])=O)=CC=C1	B13	CC1=CC(C)=C(N)C=N1	A33	O=[N+]([O-])c1cc(Nc2c(C)cc(C)nc2)ccc1
0.360258	CCCCC1=CC=C(Br)C=C1	B14	CC1=CC(C)=C(N)C=N1	A33	N(c1c(C)cc(C)nc1)c1ccc(CCCC)cc1
0.0333657	O=C(OC)C1=CC=CC=C1Br	B15	CC1=CC(C)=C(N)C=N1	A33	O=C(OC)c1c(Nc2c(C)cc(C)nc2)cccc1
0.213529	O=C(OC)C1=CC=C(Br)C=C1	B16	CC1=CC(C)=C(N)C=N1	A33	O=C(OC)c1ccc(Nc2c(C)cc(C)nc2)cc1
0.000598513	FC1=CC=C(Br)C(F)=C1	B09	O=CC1=C(N)C=NC=C1	A34	Fc1c(Nc2c(C=O)ccnc2)ccc(F)c1
0.167235	CC(C1=CC=CC=C1Br)=O	B10	O=CC1=C(N)C=NC=C1	A34	O=C(C)c1c(Nc2c(C=O)ccnc2)cccc1
0.0454131	CN(C)C1=CC=CC=C1Br	B12	O=CC1=C(N)C=NC=C1	A34	O=Cc1c(Nc2c(N(C)C)cccc2)cncc1
0.119362	BrC1=CC([N+]([O-])=O)=CC=C1	B13	O=CC1=C(N)C=NC=C1	A34	O=[N+]([O-])c1cc(Nc2c(C=O)ccnc2)ccc1
0.00865502	CCCCC1=CC=C(Br)C=C1	B14	O=CC1=C(N)C=NC=C1	A34	O=Cc1c(Nc2ccc(CCCC)cc2)cncc1
0.362596	FC1=CC=C(Br)C(F)=C1	B09	COC1=NC=C(N)C=C1	A35	Fc1c(Nc2cnc(OC)cc2)ccc(F)c1
0.24782	CC(C1=CC=C(Br)C=C1)C	B11	COC1=NC=C(N)C=C1	A35	O(C)c1ncc(Nc2ccc(C(C)C)cc2)cc1
0.129381	CN(C)C1=CC=CC=C1Br	B12	COC1=NC=C(N)C=C1	A35	O(C)c1ncc(Nc2c(N(C)C)cccc2)cc1
0.709337	BrC1=CC([N+]([O-])=O)=CC=C1	B13	COC1=NC=C(N)C=C1	A35	O=[N+]([O-])c1cc(Nc2cnc(OC)cc2)ccc1
0.277305	CCCCC1=CC=C(Br)C=C1	B14	COC1=NC=C(N)C=C1	A35	O(C)c1ncc(Nc2ccc(CCCC)cc2)cc1
0.226527	O=C(OC)C1=CC=CC=C1Br	B15	COC1=NC=C(N)C=C1	A35	O=C(OC)c1c(Nc2cnc(OC)cc2)cccc1
0.139635	O=C(OC)C1=CC=C(Br)C=C1	B16	COC1=NC=C(N)C=C1	A35	O=C(OC)c1ccc(Nc2cnc(OC)cc2)cc1
0.00632633	FC1=CC=C(Br)C(F)=C1	B09	N#CCC1=NC=CC=C1N	A36	Fc1c(Nc2c(CC#N)nccc2)ccc(F)c1
0.0284384	CC(C1=CC=C(Br)C=C1)C	B11	N#CCC1=NC=CC=C1N	A36	N#CCc1c(Nc2ccc(C(C)C)cc2)cccn1
0.0513398	CCCCC1=CC=C(Br)C=C1	B14	N#CCC1=NC=CC=C1N	A36	N#CCc1c(Nc2ccc(CCCC)cc2)cccn1
0.146307	CC(C1=CC=C(Br)C=C1)C	B11	O=C(C1=CC=CN=C1N)C	A37	O=C(C)c1c(Nc2ccc(C(C)C)cc2)nccc1
0.0407621	CN(C)C1=CC=CC=C1Br	B12	O=C(C1=CC=CN=C1N)C	A37	O=C(C)c1c(Nc2c(N(C)C)cccc2)nccc1
0.189279	BrC1=CC([N+]([O-])=O)=CC=C1	B13	O=C(C1=CC=CN=C1N)C	A37	O=[N+]([O-])c1cc(Nc2c(C(=O)C)cccn2)ccc1
0.11693	CCCCC1=CC=C(Br)C=C1	B14	O=C(C1=CC=CN=C1N)C	A37	O=C(C)c1c(Nc2ccc(CCCC)cc2)nccc1
0.199579	FC1=CC=C(Br)C(F)=C1	B09	CCOC1=NC=CC(N)=C1	A38	Fc1c(Nc2cc(OCC)ncc2)ccc(F)c1
0.205077	CC(C1=CC=C(Br)C=C1)C	B11	CCOC1=NC=CC(N)=C1	A38	O(CC)c1nccc(Nc2ccc(C(C)C)cc2)c1
0.0357498	CN(C)C1=CC=CC=C1Br	B12	CCOC1=NC=CC(N)=C1	A38	O(CC)c1nccc(Nc2c(N(C)C)cccc2)c1
0.366028	BrC1=CC([N+]([O-])=O)=CC=C1	B13	CCOC1=NC=CC(N)=C1	A38	O=[N+]([O-])c1cc(Nc2cc(OCC)ncc2)ccc1
0.172051	CCCCC1=CC=C(Br)C=C1	B14	CCOC1=NC=CC(N)=C1	A38	O(CC)c1nccc(Nc2ccc(CCCC)cc2)c1
0.0961286	O=C(OC)C1=CC=CC=C1Br	B15	CCOC1=NC=CC(N)=C1	A38	O=C(OC)c1c(Nc2cc(OCC)ncc2)cccc1
0.238576	O=C(OC)C1=CC=C(Br)C=C1	B16	CCOC1=NC=CC(N)=C1	A38	O=C(OC)c1ccc(Nc2cc(OCC)ncc2)cc1
0.0662723	FC1=CC=C(Br)C(F)=C1	B09	CCOC1=CC(N)=NC=C1	A39	Fc1c(Nc2nccc(OCC)c2)ccc(F)c1
0.00297482	CC(C1=CC=CC=C1Br)=O	B10	CCOC1=CC(N)=NC=C1	A39	O=C(C)c1c(Nc2nccc(OCC)c2)cccc1
0.284483	CC(C1=CC=C(Br)C=C1)C	B11	CCOC1=CC(N)=NC=C1	A39	O(CC)c1cc(Nc2ccc(C(C)C)cc2)ncc1
0.151962	CN(C)C1=CC=CC=C1Br	B12	CCOC1=CC(N)=NC=C1	A39	O(CC)c1cc(Nc2c(N(C)C)cccc2)ncc1
0.408804	BrC1=CC([N+]([O-])=O)=CC=C1	B13	CCOC1=CC(N)=NC=C1	A39	O=[N+]([O-])c1cc(Nc2nccc(OCC)c2)ccc1
0.244921	CCCCC1=CC=C(Br)C=C1	B14	CCOC1=CC(N)=NC=C1	A39	O(CC)c1cc(Nc2ccc(CCCC)cc2)ncc1
0.0909264	O=C(OC)C1=CC=C(Br)C=C1	B16	CCOC1=CC(N)=NC=C1	A39	O=C(OC)c1ccc(Nc2nccc(OCC)c2)cc1
0.0129396	FC1=CC=C(Br)C(F)=C1	B09	O=[N+](C1=CN=C(N)C=C1)[O-]	A40	Fc1c(Nc2ncc([N+](=O)[O-])cc2)ccc(F)c1
0.0149775	CC(C1=CC=CC=C1Br)=O	B10	O=[N+](C1=CN=C(N)C=C1)[O-]	A40	O=[N+]([O-])c1cnc(Nc2c(C(=O)C)cccc2)cc1
0.331022	CC(C1=CC=C(Br)C=C1)C	B11	O=[N+](C1=CN=C(N)C=C1)[O-]	A40	O=[N+]([O-])c1cnc(Nc2ccc(C(C)C)cc2)cc1
0.0751637	CN(C)C1=CC=CC=C1Br	B12	O=[N+](C1=CN=C(N)C=C1)[O-]	A40	O=[N+]([O-])c1cnc(Nc2c(N(C)C)cccc2)cc1
0.369471	CCCCC1=CC=C(Br)C=C1	B14	O=[N+](C1=CN=C(N)C=C1)[O-]	A40	O=[N+]([O-])c1cnc(Nc2ccc(CCCC)cc2)cc1
0.101477	O=C(OC)C1=CC=C(Br)C=C1	B16	O=[N+](C1=CN=C(N)C=C1)[O-]	A40	O=[N+]([O-])c1cnc(Nc2ccc(C(=O)OC)cc2)cc1
0.258508	FC1=CC=C(Br)C(F)=C1	B09	O=C(OC)C1=CC=NC=C1N	A41	Fc1c(Nc2c(C(=O)OC)ccnc2)ccc(F)c1
0.191536	CC(C1=CC=C(Br)C=C1)C	B11	O=C(OC)C1=CC=NC=C1N	A41	O=C(OC)c1c(Nc2ccc(C(C)C)cc2)cncc1
0.14138	CCCCC1=CC=C(Br)C=C1	B14	O=C(OC)C1=CC=NC=C1N	A41	O=C(OC)c1c(Nc2ccc(CCCC)cc2)cncc1
0.0205967	O=C(OC)C1=CC=CC=C1Br	B15	O=C(OC)C1=CC=NC=C1N	A41	O=C(OC)c1c(Nc2c(C(=O)OC)cccc2)cncc1
0.0953269	O=C(OC)C1=CC=C(Br)C=C1	B16	O=C(OC)C1=CC=NC=C1N	A41	O=C(OC)c1c(Nc2ccc(C(=O)OC)cc2)cncc1
0.0564708	FC1=CC=C(Br)C(F)=C1	B09	O=C(C1=C(N)C=CN=C1)OC	A42	Fc1c(Nc2c(C(=O)OC)cncc2)ccc(F)c1
0.158742	CC(C1=CC=C(Br)C=C1)C	B11	O=C(C1=C(N)C=CN=C1)OC	A42	O=C(OC)c1c(Nc2ccc(C(C)C)cc2)ccnc1
0.0639349	CN(C)C1=CC=CC=C1Br	B12	O=C(C1=C(N)C=CN=C1)OC	A42	O=C(OC)c1c(Nc2c(N(C)C)cccc2)ccnc1
0.123483	O=C(OC)C1=CC=C(Br)C=C1	B16	O=C(C1=C(N)C=CN=C1)OC	A42	O=C(OC)c1c(Nc2ccc(C(=O)OC)cc2)ccnc1
0.125831	FC1=CC=C(Br)C(F)=C1	B09	O=C(C1=NC=CC(N)=C1)OC	A43	Fc1c(Nc2cc(C(=O)OC)ncc2)ccc(F)c1
0.157749	CC(C1=CC=C(Br)C=C1)C	B11	O=C(C1=NC=CC(N)=C1)OC	A43	O=C(OC)c1nccc(Nc2ccc(C(C)C)cc2)c1
0.0443691	CN(C)C1=CC=CC=C1Br	B12	O=C(C1=NC=CC(N)=C1)OC	A43	O=C(OC)c1nccc(Nc2c(N(C)C)cccc2)c1
0.0427586	O=C(OC)C1=CC=CC=C1Br	B15	O=C(C1=NC=CC(N)=C1)OC	A43	O=C(OC)c1c(Nc2cc(C(=O)OC)ncc2)cccc1
0.211053	O=C(OC)C1=CC=C(Br)C=C1	B16	O=C(C1=NC=CC(N)=C1)OC	A43	O=C(OC)c1nccc(Nc2ccc(C(=O)OC)cc2)c1
0.131982	FC1=CC=C(Br)C(F)=C1	B09	O=C(OC)C1=CC=NC(N)=C1	A44	Fc1c(Nc2nccc(C(=O)OC)c2)ccc(F)c1
0.00479346	CC(C1=CC=CC=C1Br)=O	B10	O=C(OC)C1=CC=NC(N)=C1	A44	O=C(OC)c1cc(Nc2c(C(=O)C)cccc2)ncc1
0.32077	CC(C1=CC=C(Br)C=C1)C	B11	O=C(OC)C1=CC=NC(N)=C1	A44	O=C(OC)c1cc(Nc2ccc(C(C)C)cc2)ncc1
0.0444967	O=C(OC)C1=CC=C(Br)C=C1	B16	O=C(OC)C1=CC=NC(N)=C1	A44	O=C(OC)c1cc(Nc2ccc(C(=O)OC)cc2)ncc1
0.0563678	FC1=CC=C(Br)C(F)=C1	B09	NC1=NC=C(C(F)(F)F)C=C1	A45	FC(F)(F)c1cnc(Nc2c(F)cc(F)cc2)cc1
0.167584	CC(C1=CC=C(Br)C=C1)C	B11	NC1=NC=C(C(F)(F)F)C=C1	A45	FC(F)(F)c1cnc(Nc2ccc(C(C)C)cc2)cc1
0.350548	FC1=CC=C(Br)C(F)=C1	B09	FC(C1=NC=C(N)C=C1)(F)F	A46	FC(F)(F)c1ncc(Nc2c(F)cc(F)cc2)cc1
0.116587	CC(C1=CC=C(Br)C=C1)C	B11	FC(C1=NC=C(N)C=C1)(F)F	A46	FC(F)(F)c1ncc(Nc2ccc(C(C)C)cc2)cc1
0.103294	CN(C)C1=CC=CC=C1Br	B12	FC(C1=NC=C(N)C=C1)(F)F	A46	FC(F)(F)c1ncc(Nc2c(N(C)C)cccc2)cc1
0.0804913	O=C(OC)C1=CC=CC=C1Br	B15	FC(C1=NC=C(N)C=C1)(F)F	A46	FC(F)(F)c1ncc(Nc2c(C(=O)OC)cccc2)cc1
0.342713	FC1=CC=C(Br)C(F)=C1	B09	FC(C1=NC=CC(N)=C1)(F)F	A47	FC(F)(F)c1nccc(Nc2c(F)cc(F)cc2)c1
0.155893	CC(C1=CC=C(Br)C=C1)C	B11	FC(C1=NC=CC(N)=C1)(F)F	A47	FC(F)(F)c1nccc(Nc2ccc(C(C)C)cc2)c1
0.160883	CN(C)C1=CC=CC=C1Br	B12	FC(C1=NC=CC(N)=C1)(F)F	A47	FC(F)(F)c1nccc(Nc2c(N(C)C)cccc2)c1
0.029423	O=C(OC)C1=CC=CC=C1Br	B15	FC(C1=NC=CC(N)=C1)(F)F	A47	FC(F)(F)c1nccc(Nc2c(C(=O)OC)cccc2)c1
0.0639121	FC1=CC=C(Br)C(F)=C1	B09	O=C(OCC)C1=NC=CC(N)=C1	A48	Fc1c(Nc2cc(C(=O)OCC)ncc2)ccc(F)c1
0.109618	CC(C1=CC=C(Br)C=C1)C	B11	O=C(OCC)C1=NC=CC(N)=C1	A48	O=C(OCC)c1nccc(Nc2ccc(C(C)C)cc2)c1
0.0307551	O=C(OC)C1=CC=CC=C1Br	B15	O=C(OCC)C1=NC=CC(N)=C1	A48	O=C(OC)c1c(Nc2cc(C(=O)OCC)ncc2)cccc1
0.319524	O=C(O)CC1=CC=CC(Br)=C1	B18	CC1=CN=C(N)C=C1	A25	O=C(O)Cc1cc(Nc2ncc(C)cc2)ccc1
0.413251	COC1=CC(Br)=CC=C1OC	B19	CC1=CN=C(N)C=C1	A25	O(C)c1c(OC)ccc(Nc2ncc(C)cc2)c1
0.367407	COC1=CC=C(Br)C(OC)=C1	B20	CC1=CN=C(N)C=C1	A25	O(C)c1c(Nc2ncc(C)cc2)ccc(OC)c1
0.267371	FC(C1=CC=C(Br)C=C1)(F)F	B21	CC1=CN=C(N)C=C1	A25	FC(F)(F)c1ccc(Nc2ncc(C)cc2)cc1
0.354778	O=C(OC)C1=CC(Br)=CC(C(OC)=O)=C1	B23	CC1=CN=C(N)C=C1	A25	O=C(OC)c1cc(Nc2ncc(C)cc2)cc(C(=O)OC)c1
0.10623	FC(C1=CC=C(C(F)(F)F)C(Br)=C1)(F)F	B24	CC1=CN=C(N)C=C1	A25	FC(F)(F)c1c(Nc2ncc(C)cc2)cc(C(F)(F)F)cc1
0.152022	O=C(O)C1=CC(Br)=CC=C1C	B17	CC1=C(N)C=NC=C1	A26	O=C(O)c1c(C)ccc(Nc2c(C)ccnc2)c1
0.095357	O=C(O)CC1=CC=CC(Br)=C1	B18	CC1=C(N)C=NC=C1	A26	O=C(O)Cc1cc(Nc2c(C)ccnc2)ccc1
0.228535	COC1=CC(Br)=CC=C1OC	B19	CC1=C(N)C=NC=C1	A26	O(C)c1c(OC)ccc(Nc2c(C)ccnc2)c1
0.149383	FC(C1=CC=C(Br)C=C1)(F)F	B21	CC1=C(N)C=NC=C1	A26	FC(F)(F)c1ccc(Nc2c(C)ccnc2)cc1
0.258951	CCCCCC1=CC=C(Br)C=C1	B22	CC1=C(N)C=NC=C1	A26	N(c1c(C)ccnc1)c1ccc(CCCCC)cc1
0.234711	O=C(OC)C1=CC(Br)=CC(C(OC)=O)=C1	B23	CC1=C(N)C=NC=C1	A26	O=C(OC)c1cc(Nc2c(C)ccnc2)cc(C(=O)OC)c1
0.0865824	FC(C1=CC=C(C(F)(F)F)C(Br)=C1)(F)F	B24	CC1=C(N)C=NC=C1	A26	FC(F)(F)c1c(Nc2c(C)ccnc2)cc(C(F)(F)F)cc1
0.0855068	O=C(O)C1=CC(Br)=CC=C1C	B17	CC1=NC=CC(N)=C1	A27	O=C(O)c1c(C)ccc(Nc2cc(C)ncc2)c1
0.183582	COC1=CC=C(Br)C(OC)=C1	B20	CC1=NC=CC(N)=C1	A27	O(C)c1c(Nc2cc(C)ncc2)ccc(OC)c1
0.102295	FC(C1=CC=C(Br)C=C1)(F)F	B21	CC1=NC=CC(N)=C1	A27	FC(F)(F)c1ccc(Nc2cc(C)ncc2)cc1
0.116067	CCCCCC1=CC=C(Br)C=C1	B22	CC1=NC=CC(N)=C1	A27	N(c1cc(C)ncc1)c1ccc(CCCCC)cc1
0.217261	O=C(OC)C1=CC(Br)=CC(C(OC)=O)=C1	B23	CC1=NC=CC(N)=C1	A27	O=C(OC)c1cc(Nc2cc(C)ncc2)cc(C(=O)OC)c1
0.223216	FC(C1=CC=C(C(F)(F)F)C(Br)=C1)(F)F	B24	CC1=NC=CC(N)=C1	A27	FC(F)(F)c1c(Nc2cc(C)ncc2)cc(C(F)(F)F)cc1
0.322459	O=C(O)C1=CC(Br)=CC=C1C	B17	FC1=CC=CC(N)=N1	A28	Fc1nc(Nc2cc(C(=O)O)c(C)cc2)ccc1
0.303906	O=C(O)CC1=CC=CC(Br)=C1	B18	FC1=CC=CC(N)=N1	A28	Fc1nc(Nc2cc(CC(=O)O)ccc2)ccc1
0.363253	COC1=CC(Br)=CC=C1OC	B19	FC1=CC=CC(N)=N1	A28	Fc1nc(Nc2cc(OC)c(OC)cc2)ccc1
0.279491	FC(C1=CC=C(Br)C=C1)(F)F	B21	FC1=CC=CC(N)=N1	A28	FC(F)(F)c1ccc(Nc2nc(F)ccc2)cc1
0.23814	FC(C1=CC=C(C(F)(F)F)C(Br)=C1)(F)F	B24	FC1=CC=CC(N)=N1	A28	FC(F)(F)c1c(Nc2nc(F)ccc2)cc(C(F)(F)F)cc1
0.0607567	O=C(O)C1=CC(Br)=CC=C1C	B17	FC1=NC=C(N)C=C1	A29	Fc1ncc(Nc2cc(C(=O)O)c(C)cc2)cc1
0.0351738	O=C(O)CC1=CC=CC(Br)=C1	B18	FC1=NC=C(N)C=C1	A29	Fc1ncc(Nc2cc(CC(=O)O)ccc2)cc1
0.175822	COC1=CC(Br)=CC=C1OC	B19	FC1=NC=C(N)C=C1	A29	Fc1ncc(Nc2cc(OC)c(OC)cc2)cc1
0.209191	COC1=CC=C(Br)C(OC)=C1	B20	FC1=NC=C(N)C=C1	A29	Fc1ncc(Nc2c(OC)cc(OC)cc2)cc1
0.094469	FC(C1=CC=C(Br)C=C1)(F)F	B21	FC1=NC=C(N)C=C1	A29	FC(F)(F)c1ccc(Nc2cnc(F)cc2)cc1
0.100621	CCCCCC1=CC=C(Br)C=C1	B22	FC1=NC=C(N)C=C1	A29	Fc1ncc(Nc2ccc(CCCCC)cc2)cc1
0.169392	O=C(OC)C1=CC(Br)=CC(C(OC)=O)=C1	B23	FC1=NC=C(N)C=C1	A29	Fc1ncc(Nc2cc(C(=O)OC)cc(C(=O)OC)c2)cc1
0.155799	FC(C1=CC=C(C(F)(F)F)C(Br)=C1)(F)F	B24	FC1=NC=C(N)C=C1	A29	FC(F)(F)c1c(Nc2cnc(F)cc2)cc(C(F)(F)F)cc1
0.187315	O=C(O)CC1=CC=CC(Br)=C1	B18	FC1=C(N)C=CN=C1	A30	Fc1c(Nc2cc(CC(=O)O)ccc2)ccnc1
0.292442	COC1=CC(Br)=CC=C1OC	B19	FC1=C(N)C=CN=C1	A30	Fc1c(Nc2cc(OC)c(OC)cc2)ccnc1
0.352046	COC1=CC=C(Br)C(OC)=C1	B20	FC1=C(N)C=CN=C1	A30	Fc1c(Nc2c(OC)cc(OC)cc2)ccnc1
0.254613	CCCCCC1=CC=C(Br)C=C1	B22	FC1=C(N)C=CN=C1	A30	Fc1c(Nc2ccc(CCCCC)cc2)ccnc1
0.390543	O=C(OC)C1=CC(Br)=CC(C(OC)=O)=C1	B23	FC1=C(N)C=CN=C1	A30	Fc1c(Nc2cc(C(=O)OC)cc(C(=O)OC)c2)ccnc1
0.181755	FC(C1=CC=C(C(F)(F)F)C(Br)=C1)(F)F	B24	FC1=C(N)C=CN=C1	A30	FC(F)(F)c1c(Nc2c(F)cncc2)cc(C(F)(F)F)cc1
0.260006	O=C(O)CC1=CC=CC(Br)=C1	B18	N#CC1=CC(N)=NC=C1	A31	O=C(O)Cc1cc(Nc2nccc(C#N)c2)ccc1
0.202489	COC1=CC(Br)=CC=C1OC	B19	N#CC1=CC(N)=NC=C1	A31	O(C)c1c(OC)ccc(Nc2nccc(C#N)c2)c1
0.257544	COC1=CC=C(Br)C(OC)=C1	B20	N#CC1=CC(N)=NC=C1	A31	O(C)c1c(Nc2nccc(C#N)c2)ccc(OC)c1
0.121586	FC(C1=CC=C(Br)C=C1)(F)F	B21	N#CC1=CC(N)=NC=C1	A31	FC(F)(F)c1ccc(Nc2nccc(C#N)c2)cc1
0.268382	CCCCCC1=CC=C(Br)C=C1	B22	N#CC1=CC(N)=NC=C1	A31	N#Cc1cc(Nc2ccc(CCCCC)cc2)ncc1
0.495592	O=C(OC)C1=CC(Br)=CC(C(OC)=O)=C1	B23	N#CC1=CC(N)=NC=C1	A31	O=C(OC)c1cc(Nc2nccc(C#N)c2)cc(C(=O)OC)c1
0.152394	FC(C1=CC=C(C(F)(F)F)C(Br)=C1)(F)F	B24	N#CC1=CC(N)=NC=C1	A31	FC(F)(F)c1c(Nc2nccc(C#N)c2)cc(C(F)(F)F)cc1
0.128471	O=C(O)CC1=CC=CC(Br)=C1	B18	N#CC1=NC=CC(N)=C1	A32	O=C(O)Cc1cc(Nc2cc(C#N)ncc2)ccc1
0.249125	COC1=CC(Br)=CC=C1OC	B19	N#CC1=NC=CC(N)=C1	A32	O(C)c1c(OC)ccc(Nc2cc(C#N)ncc2)c1
0.142984	FC(C1=CC=C(Br)C=C1)(F)F	B21	N#CC1=NC=CC(N)=C1	A32	FC(F)(F)c1ccc(Nc2cc(C#N)ncc2)cc1
0.186195	CCCCCC1=CC=C(Br)C=C1	B22	N#CC1=NC=CC(N)=C1	A32	N#Cc1nccc(Nc2ccc(CCCCC)cc2)c1
0.284979	O=C(OC)C1=CC(Br)=CC(C(OC)=O)=C1	B23	N#CC1=NC=CC(N)=C1	A32	O=C(OC)c1cc(Nc2cc(C#N)ncc2)cc(C(=O)OC)c1
0.221926	O=C(O)C1=CC(Br)=CC=C1C	B17	CC1=CC(C)=C(N)C=N1	A33	O=C(O)c1c(C)ccc(Nc2c(C)cc(C)nc2)c1
0.168236	O=C(O)CC1=CC=CC(Br)=C1	B18	CC1=CC(C)=C(N)C=N1	A33	O=C(O)Cc1cc(Nc2c(C)cc(C)nc2)ccc1
0.300741	COC1=CC(Br)=CC=C1OC	B19	CC1=CC(C)=C(N)C=N1	A33	O(C)c1c(OC)ccc(Nc2c(C)cc(C)nc2)c1
0.410766	COC1=CC=C(Br)C(OC)=C1	B20	CC1=CC(C)=C(N)C=N1	A33	O(C)c1c(Nc2c(C)cc(C)nc2)ccc(OC)c1
0.345489	CCCCCC1=CC=C(Br)C=C1	B22	CC1=CC(C)=C(N)C=N1	A33	N(c1c(C)cc(C)nc1)c1ccc(CCCCC)cc1
0.302397	O=C(OC)C1=CC(Br)=CC(C(OC)=O)=C1	B23	CC1=CC(C)=C(N)C=N1	A33	O=C(OC)c1cc(Nc2c(C)cc(C)nc2)cc(C(=O)OC)c1
0.130742	FC(C1=CC=C(C(F)(F)F)C(Br)=C1)(F)F	B24	CC1=CC(C)=C(N)C=N1	A33	FC(F)(F)c1c(Nc2c(C)cc(C)nc2)cc(C(F)(F)F)cc1
0.043609	O=C(O)C1=CC(Br)=CC=C1C	B17	O=CC1=C(N)C=NC=C1	A34	O=C(O)c1c(C)ccc(Nc2c(C=O)ccnc2)c1
0.0185502	COC1=CC(Br)=CC=C1OC	B19	O=CC1=C(N)C=NC=C1	A34	O=Cc1c(Nc2cc(OC)c(OC)cc2)cncc1
0.0448813	COC1=CC=C(Br)C(OC)=C1	B20	O=CC1=C(N)C=NC=C1	A34	O=Cc1c(Nc2c(OC)cc(OC)cc2)cncc1
0.0333266	CCCCCC1=CC=C(Br)C=C1	B22	O=CC1=C(N)C=NC=C1	A34	O=Cc1c(Nc2ccc(CCCCC)cc2)cncc1
0.0586379	FC(C1=CC=C(C(F)(F)F)C(Br)=C1)(F)F	B24	O=CC1=C(N)C=NC=C1	A34	FC(F)(F)c1c(Nc2c(C=O)ccnc2)cc(C(F)(F)F)cc1
0.248457	O=C(O)C1=CC(Br)=CC=C1C	B17	COC1=NC=C(N)C=C1	A35	O=C(O)c1c(C)ccc(Nc2cnc(OC)cc2)c1
0.245436	O=C(O)CC1=CC=CC(Br)=C1	B18	COC1=NC=C(N)C=C1	A35	O=C(O)Cc1cc(Nc2cnc(OC)cc2)ccc1
0.318551	COC1=CC(Br)=CC=C1OC	B19	COC1=NC=C(N)C=C1	A35	O(C)c1c(OC)ccc(Nc2cnc(OC)cc2)c1
0.347922	COC1=CC=C(Br)C(OC)=C1	B20	COC1=NC=C(N)C=C1	A35	O(C)c1c(Nc2cnc(OC)cc2)ccc(OC)c1
0.235918	FC(C1=CC=C(Br)C=C1)(F)F	B21	COC1=NC=C(N)C=C1	A35	FC(F)(F)c1ccc(Nc2cnc(OC)cc2)cc1
0.278371	CCCCCC1=CC=C(Br)C=C1	B22	COC1=NC=C(N)C=C1	A35	O(C)c1ncc(Nc2ccc(CCCCC)cc2)cc1
0.183377	FC(C1=CC=C(C(F)(F)F)C(Br)=C1)(F)F	B24	COC1=NC=C(N)C=C1	A35	FC(F)(F)c1c(Nc2cnc(OC)cc2)cc(C(F)(F)F)cc1
0.0202358	FC(C1=CC=C(Br)C=C1)(F)F	B21	N#CCC1=NC=CC=C1N	A36	FC(F)(F)c1ccc(Nc2c(CC#N)nccc2)cc1
0.0630828	CCCCCC1=CC=C(Br)C=C1	B22	N#CCC1=NC=CC=C1N	A36	N#CCc1c(Nc2ccc(CCCCC)cc2)cccn1
0.021379	O=C(OC)C1=CC(Br)=CC(C(OC)=O)=C1	B23	N#CCC1=NC=CC=C1N	A36	O=C(OC)c1cc(Nc2c(CC#N)nccc2)cc(C(=O)OC)c1
0.0197731	FC(C1=CC=C(C(F)(F)F)C(Br)=C1)(F)F	B24	N#CCC1=NC=CC=C1N	A36	FC(F)(F)c1c(Nc2c(CC#N)nccc2)cc(C(F)(F)F)cc1
0.174676	O=C(O)CC1=CC=CC(Br)=C1	B18	O=C(C1=CC=CN=C1N)C	A37	O=C(O)Cc1cc(Nc2c(C(=O)C)cccn2)ccc1
0.268509	COC1=CC(Br)=CC=C1OC	B19	O=C(C1=CC=CN=C1N)C	A37	O=C(C)c1c(Nc2cc(OC)c(OC)cc2)nccc1
0.194577	COC1=CC=C(Br)C(OC)=C1	B20	O=C(C1=CC=CN=C1N)C	A37	O=C(C)c1c(Nc2c(OC)cc(OC)cc2)nccc1
0.0701063	FC(C1=CC=C(Br)C=C1)(F)F	B21	O=C(C1=CC=CN=C1N)C	A37	FC(F)(F)c1ccc(Nc2c(C(=O)C)cccn2)cc1
0.154674	CCCCCC1=CC=C(Br)C=C1	B22	O=C(C1=CC=CN=C1N)C	A37	O=C(C)c1c(Nc2ccc(CCCCC)cc2)nccc1
0.244097	O=C(OC)C1=CC(Br)=CC(C(OC)=O)=C1	B23	O=C(C1=CC=CN=C1N)C	A37	O=C(OC)c1cc(Nc2c(C(=O)C)cccn2)cc(C(=O)OC)c1
0.0643896	FC(C1=CC=C(C(F)(F)F)C(Br)=C1)(F)F	B24	O=C(C1=CC=CN=C1N)C	A37	FC(F)(F)c1c(Nc2c(C(=O)C)cccn2)cc(C(F)(F)F)cc1
0.164566	O=C(O)C1=CC(Br)=CC=C1C	B17	CCOC1=NC=CC(N)=C1	A38	O=C(O)c1c(C)ccc(Nc2cc(OCC)ncc2)c1
0.141864	O=C(O)CC1=CC=CC(Br)=C1	B18	CCOC1=NC=CC(N)=C1	A38	O=C(O)Cc1cc(Nc2cc(OCC)ncc2)ccc1
0.361561	COC1=CC(Br)=CC=C1OC	B19	CCOC1=NC=CC(N)=C1	A38	O(CC)c1nccc(Nc2cc(OC)c(OC)cc2)c1
0.340912	COC1=CC=C(Br)C(OC)=C1	B20	CCOC1=NC=CC(N)=C1	A38	O(CC)c1nccc(Nc2c(OC)cc(OC)cc2)c1
0.153783	FC(C1=CC=C(Br)C=C1)(F)F	B21	CCOC1=NC=CC(N)=C1	A38	FC(F)(F)c1ccc(Nc2cc(OCC)ncc2)cc1
0.17782	CCCCCC1=CC=C(Br)C=C1	B22	CCOC1=NC=CC(N)=C1	A38	O(CC)c1nccc(Nc2ccc(CCCCC)cc2)c1
0.295382	O=C(OC)C1=CC(Br)=CC(C(OC)=O)=C1	B23	CCOC1=NC=CC(N)=C1	A38	O=C(OC)c1cc(Nc2cc(OCC)ncc2)cc(C(=O)OC)c1
0.20999	FC(C1=CC=C(C(F)(F)F)C(Br)=C1)(F)F	B24	CCOC1=NC=CC(N)=C1	A38	FC(F)(F)c1c(Nc2cc(OCC)ncc2)cc(C(F)(F)F)cc1
0.189326	O=C(O)C1=CC(Br)=CC=C1C	B17	CCOC1=CC(N)=NC=C1	A39	O=C(O)c1c(C)ccc(Nc2nccc(OCC)c2)c1
0.212441	O=C(O)CC1=CC=CC(Br)=C1	B18	CCOC1=CC(N)=NC=C1	A39	O=C(O)Cc1cc(Nc2nccc(OCC)c2)ccc1
0.232672	COC1=CC(Br)=CC=C1OC	B19	CCOC1=CC(N)=NC=C1	A39	O(CC)c1cc(Nc2cc(OC)c(OC)cc2)ncc1
0.193896	COC1=CC=C(Br)C(OC)=C1	B20	CCOC1=CC(N)=NC=C1	A39	O(CC)c1cc(Nc2c(OC)cc(OC)cc2)ncc1
0.249063	FC(C1=CC=C(Br)C=C1)(F)F	B21	CCOC1=CC(N)=NC=C1	A39	FC(F)(F)c1ccc(Nc2nccc(OCC)c2)cc1
0.263875	CCCCCC1=CC=C(Br)C=C1	B22	CCOC1=CC(N)=NC=C1	A39	O(CC)c1cc(Nc2ccc(CCCCC)cc2)ncc1
0.211638	O=C(OC)C1=CC(Br)=CC(C(OC)=O)=C1	B23	CCOC1=CC(N)=NC=C1	A39	O=C(OC)c1cc(Nc2nccc(OCC)c2)cc(C(=O)OC)c1
0.0765515	FC(C1=CC=C(C(F)(F)F)C(Br)=C1)(F)F	B24	CCOC1=CC(N)=NC=C1	A39	FC(F)(F)c1c(Nc2nccc(OCC)c2)cc(C(F)(F)F)cc1
0.283078	O=C(O)C1=CC(Br)=CC=C1C	B17	O=[N+](C1=CN=C(N)C=C1)[O-]	A40	O=[N+]([O-])c1cnc(Nc2cc(C(=O)O)c(C)cc2)cc1
0.362034	O=C(O)CC1=CC=CC(Br)=C1	B18	O=[N+](C1=CN=C(N)C=C1)[O-]	A40	O=[N+]([O-])c1cnc(Nc2cc(CC(=O)O)ccc2)cc1
0.15991	COC1=CC(Br)=CC=C1OC	B19	O=[N+](C1=CN=C(N)C=C1)[O-]	A40	O=[N+]([O-])c1cnc(Nc2cc(OC)c(OC)cc2)cc1
0.0509438	COC1=CC=C(Br)C(OC)=C1	B20	O=[N+](C1=CN=C(N)C=C1)[O-]	A40	O=[N+]([O-])c1cnc(Nc2c(OC)cc(OC)cc2)cc1
0.403182	FC(C1=CC=C(Br)C=C1)(F)F	B21	O=[N+](C1=CN=C(N)C=C1)[O-]	A40	FC(F)(F)c1ccc(Nc2ncc([N+](=O)[O-])cc2)cc1
0.341087	CCCCCC1=CC=C(Br)C=C1	B22	O=[N+](C1=CN=C(N)C=C1)[O-]	A40	O=[N+]([O-])c1cnc(Nc2ccc(CCCCC)cc2)cc1
0.211044	O=C(OC)C1=CC(Br)=CC(C(OC)=O)=C1	B23	O=[N+](C1=CN=C(N)C=C1)[O-]	A40	O=[N+]([O-])c1cnc(Nc2cc(C(=O)OC)cc(C(=O)OC)c2)cc1
0.127915	FC(C1=CC=C(C(F)(F)F)C(Br)=C1)(F)F	B24	O=[N+](C1=CN=C(N)C=C1)[O-]	A40	FC(F)(F)c1c(Nc2ncc([N+](=O)[O-])cc2)cc(C(F)(F)F)cc1
0.165183	O=C(O)C1=CC(Br)=CC=C1C	B17	O=C(OC)C1=CC=NC=C1N	A41	O=C(OC)c1c(Nc2cc(C(=O)O)c(C)cc2)cncc1
0.16049	O=C(O)CC1=CC=CC(Br)=C1	B18	O=C(OC)C1=CC=NC=C1N	A41	O=C(O)Cc1cc(Nc2c(C(=O)OC)ccnc2)ccc1
0.248975	COC1=CC(Br)=CC=C1OC	B19	O=C(OC)C1=CC=NC=C1N	A41	O=C(OC)c1c(Nc2cc(OC)c(OC)cc2)cncc1
0.247166	COC1=CC=C(Br)C(OC)=C1	B20	O=C(OC)C1=CC=NC=C1N	A41	O=C(OC)c1c(Nc2c(OC)cc(OC)cc2)cncc1
0.0951943	FC(C1=CC=C(Br)C=C1)(F)F	B21	O=C(OC)C1=CC=NC=C1N	A41	FC(F)(F)c1ccc(Nc2c(C(=O)OC)ccnc2)cc1
0.13455	CCCCCC1=CC=C(Br)C=C1	B22	O=C(OC)C1=CC=NC=C1N	A41	O=C(OC)c1c(Nc2ccc(CCCCC)cc2)cncc1
0.209192	O=C(OC)C1=CC(Br)=CC(C(OC)=O)=C1	B23	O=C(OC)C1=CC=NC=C1N	A41	O=C(OC)c1c(Nc2cc(C(=O)OC)cc(C(=O)OC)c2)cncc1
0.0542881	FC(C1=CC=C(C(F)(F)F)C(Br)=C1)(F)F	B24	O=C(OC)C1=CC=NC=C1N	A41	FC(F)(F)c1c(Nc2c(C(=O)OC)ccnc2)cc(C(F)(F)F)cc1
0.101685	O=C(O)C1=CC(Br)=CC=C1C	B17	O=C(C1=C(N)C=CN=C1)OC	A42	O=C(OC)c1c(Nc2cc(C(=O)O)c(C)cc2)ccnc1
0.0842672	O=C(O)CC1=CC=CC(Br)=C1	B18	O=C(C1=C(N)C=CN=C1)OC	A42	O=C(O)Cc1cc(Nc2c(C(=O)OC)cncc2)ccc1
0.317562	COC1=CC(Br)=CC=C1OC	B19	O=C(C1=C(N)C=CN=C1)OC	A42	O=C(OC)c1c(Nc2cc(OC)c(OC)cc2)ccnc1
0.28665	COC1=CC=C(Br)C(OC)=C1	B20	O=C(C1=C(N)C=CN=C1)OC	A42	O=C(OC)c1c(Nc2c(OC)cc(OC)cc2)ccnc1
0.139325	FC(C1=CC=C(Br)C=C1)(F)F	B21	O=C(C1=C(N)C=CN=C1)OC	A42	FC(F)(F)c1ccc(Nc2c(C(=O)OC)cncc2)cc1
0.13677	CCCCCC1=CC=C(Br)C=C1	B22	O=C(C1=C(N)C=CN=C1)OC	A42	O=C(OC)c1c(Nc2ccc(CCCCC)cc2)ccnc1
0.203016	O=C(OC)C1=CC(Br)=CC(C(OC)=O)=C1	B23	O=C(C1=C(N)C=CN=C1)OC	A42	O=C(OC)c1c(Nc2cc(C(=O)OC)cc(C(=O)OC)c2)ccnc1
0.152314	FC(C1=CC=C(C(F)(F)F)C(Br)=C1)(F)F	B24	O=C(C1=C(N)C=CN=C1)OC	A42	FC(F)(F)c1c(Nc2c(C(=O)OC)cncc2)cc(C(F)(F)F)cc1
0.101177	O=C(O)C1=CC(Br)=CC=C1C	B17	O=C(C1=NC=CC(N)=C1)OC	A43	O=C(OC)c1nccc(Nc2cc(C(=O)O)c(C)cc2)c1
0.0669326	O=C(O)CC1=CC=CC(Br)=C1	B18	O=C(C1=NC=CC(N)=C1)OC	A43	O=C(O)Cc1cc(Nc2cc(C(=O)OC)ncc2)ccc1
0.206742	COC1=CC(Br)=CC=C1OC	B19	O=C(C1=NC=CC(N)=C1)OC	A43	O=C(OC)c1nccc(Nc2cc(OC)c(OC)cc2)c1
0.192088	COC1=CC=C(Br)C(OC)=C1	B20	O=C(C1=NC=CC(N)=C1)OC	A43	O=C(OC)c1nccc(Nc2c(OC)cc(OC)cc2)c1
0.120861	FC(C1=CC=C(Br)C=C1)(F)F	B21	O=C(C1=NC=CC(N)=C1)OC	A43	FC(F)(F)c1ccc(Nc2cc(C(=O)OC)ncc2)cc1
0.134874	CCCCCC1=CC=C(Br)C=C1	B22	O=C(C1=NC=CC(N)=C1)OC	A43	O=C(OC)c1nccc(Nc2ccc(CCCCC)cc2)c1
0.118027	O=C(OC)C1=CC(Br)=CC(C(OC)=O)=C1	B23	O=C(C1=NC=CC(N)=C1)OC	A43	O=C(OC)c1nccc(Nc2cc(C(=O)OC)cc(C(=O)OC)c2)c1
0.0976636	FC(C1=CC=C(C(F)(F)F)C(Br)=C1)(F)F	B24	O=C(C1=NC=CC(N)=C1)OC	A43	FC(F)(F)c1c(Nc2cc(C(=O)OC)ncc2)cc(C(F)(F)F)cc1
0.307512	O=C(O)C1=CC(Br)=CC=C1C	B17	O=C(OC)C1=CC=NC(N)=C1	A44	O=C(OC)c1cc(Nc2cc(C(=O)O)c(C)cc2)ncc1
0.329874	O=C(O)CC1=CC=CC(Br)=C1	B18	O=C(OC)C1=CC=NC(N)=C1	A44	O=C(O)Cc1cc(Nc2nccc(C(=O)OC)c2)ccc1
0.279853	COC1=CC(Br)=CC=C1OC	B19	O=C(OC)C1=CC=NC(N)=C1	A44	O=C(OC)c1cc(Nc2cc(OC)c(OC)cc2)ncc1
0.282751	COC1=CC=C(Br)C(OC)=C1	B20	O=C(OC)C1=CC=NC(N)=C1	A44	O=C(OC)c1cc(Nc2c(OC)cc(OC)cc2)ncc1
0.135315	FC(C1=CC=C(Br)C=C1)(F)F	B21	O=C(OC)C1=CC=NC(N)=C1	A44	FC(F)(F)c1ccc(Nc2nccc(C(=O)OC)c2)cc1
0.22784	O=C(O)C1=CC(Br)=CC=C1C	B17	NC1=NC=C(C(F)(F)F)C=C1	A45	FC(F)(F)c1cnc(Nc2cc(C(=O)O)c(C)cc2)cc1
0.166053	O=C(O)CC1=CC=CC(Br)=C1	B18	NC1=NC=C(C(F)(F)F)C=C1	A45	FC(F)(F)c1cnc(Nc2cc(CC(=O)O)ccc2)cc1
0.147567	COC1=CC(Br)=CC=C1OC	B19	NC1=NC=C(C(F)(F)F)C=C1	A45	FC(F)(F)c1cnc(Nc2cc(OC)c(OC)cc2)cc1
0.185671	COC1=CC=C(Br)C(OC)=C1	B20	NC1=NC=C(C(F)(F)F)C=C1	A45	FC(F)(F)c1cnc(Nc2c(OC)cc(OC)cc2)cc1
0.0948491	FC(C1=CC=C(Br)C=C1)(F)F	B21	NC1=NC=C(C(F)(F)F)C=C1	A45	FC(F)(F)c1cnc(Nc2ccc(C(F)(F)F)cc2)cc1
0.340176	O=C(OC)C1=CC(Br)=CC(C(OC)=O)=C1	B23	NC1=NC=C(C(F)(F)F)C=C1	A45	FC(F)(F)c1cnc(Nc2cc(C(=O)OC)cc(C(=O)OC)c2)cc1
0.179252	O=C(O)C1=CC(Br)=CC=C1C	B17	FC(C1=NC=C(N)C=C1)(F)F	A46	FC(F)(F)c1ncc(Nc2cc(C(=O)O)c(C)cc2)cc1
0.093582	O=C(O)CC1=CC=CC(Br)=C1	B18	FC(C1=NC=C(N)C=C1)(F)F	A46	FC(F)(F)c1ncc(Nc2cc(CC(=O)O)ccc2)cc1
0.270667	COC1=CC(Br)=CC=C1OC	B19	FC(C1=NC=C(N)C=C1)(F)F	A46	FC(F)(F)c1ncc(Nc2cc(OC)c(OC)cc2)cc1
0.109263	FC(C1=CC=C(Br)C=C1)(F)F	B21	FC(C1=NC=C(N)C=C1)(F)F	A46	FC(F)(F)c1ncc(Nc2ccc(C(F)(F)F)cc2)cc1
0.236236	O=C(OC)C1=CC(Br)=CC(C(OC)=O)=C1	B23	FC(C1=NC=C(N)C=C1)(F)F	A46	FC(F)(F)c1ncc(Nc2cc(C(=O)OC)cc(C(=O)OC)c2)cc1
0.186713	O=C(O)C1=CC(Br)=CC=C1C	B17	FC(C1=NC=CC(N)=C1)(F)F	A47	FC(F)(F)c1nccc(Nc2cc(C(=O)O)c(C)cc2)c1
0.276168	COC1=CC=C(Br)C(OC)=C1	B20	FC(C1=NC=CC(N)=C1)(F)F	A47	FC(F)(F)c1nccc(Nc2c(OC)cc(OC)cc2)c1
0.0716677	FC(C1=CC=C(Br)C=C1)(F)F	B21	FC(C1=NC=CC(N)=C1)(F)F	A47	FC(F)(F)c1nccc(Nc2ccc(C(F)(F)F)cc2)c1
0.200037	O=C(OC)C1=CC(Br)=CC(C(OC)=O)=C1	B23	FC(C1=NC=CC(N)=C1)(F)F	A47	FC(F)(F)c1nccc(Nc2cc(C(=O)OC)cc(C(=O)OC)c2)c1
0.12929	O=C(O)C1=CC(Br)=CC=C1C	B17	O=C(OCC)C1=NC=CC(N)=C1	A48	O=C(OCC)c1nccc(Nc2cc(C(=O)O)c(C)cc2)c1
0.015104	O=C(O)CC1=CC=CC(Br)=C1	B18	O=C(OCC)C1=NC=CC(N)=C1	A48	O=C(O)Cc1cc(Nc2cc(C(=O)OCC)ncc2)ccc1
0.219103	COC1=CC(Br)=CC=C1OC	B19	O=C(OCC)C1=NC=CC(N)=C1	A48	O=C(OCC)c1nccc(Nc2cc(OC)c(OC)cc2)c1
0.1549	COC1=CC=C(Br)C(OC)=C1	B20	O=C(OCC)C1=NC=CC(N)=C1	A48	O=C(OCC)c1nccc(Nc2c(OC)cc(OC)cc2)c1
0.0955698	FC(C1=CC=C(Br)C=C1)(F)F	B21	O=C(OCC)C1=NC=CC(N)=C1	A48	FC(F)(F)c1ccc(Nc2cc(C(=O)OCC)ncc2)cc1
0.0711987	CC1=NC=CC(Br)=C1	B26	CC1=CN=C(N)C=C1	A25	N(c1ncc(C)cc1)c1cc(C)ncc1
0.304165	FC1=CN=CC(Br)=C1	B29	CC1=CN=C(N)C=C1	A25	Fc1cc(Nc2ncc(C)cc2)cnc1
0.360042	FC1=NC=CC(Br)=C1	B30	CC1=CN=C(N)C=C1	A25	Fc1nccc(Nc2ncc(C)cc2)c1
0.0345002	N#CC1=C(Br)C=NC=C1	B31	CC1=CN=C(N)C=C1	A25	N#Cc1c(Nc2ncc(C)cc2)cncc1
0.37427	CC1=NC=CC(Br)=C1	B26	CC1=C(N)C=NC=C1	A26	N(c1c(C)ccnc1)c1cc(C)ncc1
0.0405063	CC1=CC=CC(Br)=N1	B27	CC1=C(N)C=NC=C1	A26	N(c1c(C)ccnc1)c1nc(C)ccc1
0	CC1=CN=CC(Br)=C1	B25	CC1=NC=CC(N)=C1	A27	N(c1cc(C)cnc1)c1cc(C)ncc1
0.0762768	CC1=CC=CC(Br)=N1	B27	CC1=NC=CC(N)=C1	A27	N(c1nc(C)ccc1)c1cc(C)ncc1
0.045708	FC1=CC(Br)=NC=C1	B28	CC1=NC=CC(N)=C1	A27	Fc1cc(Nc2cc(C)ncc2)ncc1
0.00919045	FC1=NC=CC(Br)=C1	B30	CC1=NC=CC(N)=C1	A27	Fc1nccc(Nc2cc(C)ncc2)c1
0.62802	CC1=CN=CC(Br)=C1	B25	FC1=CC=CC(N)=N1	A28	Fc1nc(Nc2cc(C)cnc2)ccc1
0.0857585	CC1=NC=CC(Br)=C1	B26	FC1=CC=CC(N)=N1	A28	Fc1nc(Nc2cc(C)ncc2)ccc1
0.368583	CC1=CC=CC(Br)=N1	B27	FC1=CC=CC(N)=N1	A28	Fc1nc(Nc2nc(C)ccc2)ccc1
0.342504	FC1=CC(Br)=NC=C1	B28	FC1=CC=CC(N)=N1	A28	Fc1nc(Nc2nccc(F)c2)ccc1
0.460474	FC1=CN=CC(Br)=C1	B29	FC1=CC=CC(N)=N1	A28	Fc1nc(Nc2cc(F)cnc2)ccc1
0.471978	FC1=NC=CC(Br)=C1	B30	FC1=CC=CC(N)=N1	A28	Fc1nccc(Nc2nc(F)ccc2)c1
0.208942	N#CC1=C(Br)C=NC=C1	B31	FC1=CC=CC(N)=N1	A28	Fc1nc(Nc2c(C#N)ccnc2)ccc1
0.0314261	CC1=NC=CC(Br)=C1	B26	FC1=NC=C(N)C=C1	A29	Fc1ncc(Nc2cc(C)ncc2)cc1
0.047402	FC1=CC(Br)=NC=C1	B28	FC1=NC=C(N)C=C1	A29	Fc1ncc(Nc2nccc(F)c2)cc1
0.0233779	N#CC1=C(Br)C=NC=C1	B31	FC1=NC=C(N)C=C1	A29	Fc1ncc(Nc2c(C#N)ccnc2)cc1
0.0976655	CC1=CN=CC(Br)=C1	B25	FC1=C(N)C=CN=C1	A30	Fc1c(Nc2cc(C)cnc2)ccnc1
0.0295198	CC1=NC=CC(Br)=C1	B26	FC1=C(N)C=CN=C1	A30	Fc1c(Nc2cc(C)ncc2)ccnc1
0.3108	CC1=CC=CC(Br)=N1	B27	FC1=C(N)C=CN=C1	A30	Fc1c(Nc2nc(C)ccc2)ccnc1
0.419529	FC1=CC(Br)=NC=C1	B28	FC1=C(N)C=CN=C1	A30	Fc1c(Nc2nccc(F)c2)ccnc1
0.306552	FC1=CN=CC(Br)=C1	B29	FC1=C(N)C=CN=C1	A30	Fc1c(Nc2cc(F)cnc2)ccnc1
0.347677	FC1=NC=CC(Br)=C1	B30	FC1=C(N)C=CN=C1	A30	Fc1c(Nc2cc(F)ncc2)ccnc1
0.212929	N#CC1=C(Br)C=NC=C1	B31	FC1=C(N)C=CN=C1	A30	Fc1c(Nc2c(C#N)ccnc2)ccnc1
0.291374	CC1=CN=CC(Br)=C1	B25	N#CC1=CC(N)=NC=C1	A31	N#Cc1cc(Nc2cc(C)cnc2)ncc1
0.0680619	CC1=NC=CC(Br)=C1	B26	N#CC1=CC(N)=NC=C1	A31	N#Cc1cc(Nc2cc(C)ncc2)ncc1
0.239337	FC1=CC(Br)=NC=C1	B28	N#CC1=CC(N)=NC=C1	A31	Fc1cc(Nc2nccc(C#N)c2)ncc1
0.2053	FC1=CN=CC(Br)=C1	B29	N#CC1=CC(N)=NC=C1	A31	Fc1cc(Nc2nccc(C#N)c2)cnc1
0.192628	FC1=NC=CC(Br)=C1	B30	N#CC1=CC(N)=NC=C1	A31	Fc1nccc(Nc2nccc(C#N)c2)c1
0.228964	N#CC1=C(Br)C=NC=C1	B31	N#CC1=CC(N)=NC=C1	A31	N#Cc1c(Nc2nccc(C#N)c2)cncc1
0.327989	CC1=CN=CC(Br)=C1	B25	N#CC1=NC=CC(N)=C1	A32	N#Cc1nccc(Nc2cc(C)cnc2)c1
0.0193316	CC1=NC=CC(Br)=C1	B26	N#CC1=NC=CC(N)=C1	A32	N#Cc1nccc(Nc2cc(C)ncc2)c1
0.228109	CC1=CC=CC(Br)=N1	B27	N#CC1=NC=CC(N)=C1	A32	N#Cc1nccc(Nc2nc(C)ccc2)c1
0.121205	FC1=CC(Br)=NC=C1	B28	N#CC1=NC=CC(N)=C1	A32	Fc1cc(Nc2cc(C#N)ncc2)ncc1
0.197778	FC1=CN=CC(Br)=C1	B29	N#CC1=NC=CC(N)=C1	A32	Fc1cc(Nc2cc(C#N)ncc2)cnc1
0.137308	FC1=NC=CC(Br)=C1	B30	N#CC1=NC=CC(N)=C1	A32	Fc1nccc(Nc2cc(C#N)ncc2)c1
0.218883	N#CC1=C(Br)C=NC=C1	B31	N#CC1=NC=CC(N)=C1	A32	N#Cc1c(Nc2cc(C#N)ncc2)cncc1
0	CC1=NC=CC(Br)=C1	B26	CC1=CC(C)=C(N)C=N1	A33	N(c1c(C)cc(C)nc1)c1cc(C)ncc1
0.0516093	CC1=CC=CC(Br)=N1	B27	CC1=CC(C)=C(N)C=N1	A33	N(c1c(C)cc(C)nc1)c1nc(C)ccc1
0.0852978	FC1=CC(Br)=NC=C1	B28	CC1=CC(C)=C(N)C=N1	A33	Fc1cc(Nc2c(C)cc(C)nc2)ncc1
0.0472318	FC1=CN=CC(Br)=C1	B29	CC1=CC(C)=C(N)C=N1	A33	Fc1cc(Nc2c(C)cc(C)nc2)cnc1
0.038161	FC1=NC=CC(Br)=C1	B30	CC1=CC(C)=C(N)C=N1	A33	Fc1nccc(Nc2c(C)cc(C)nc2)c1
0.0180521	N#CC1=C(Br)C=NC=C1	B31	CC1=CC(C)=C(N)C=N1	A33	N#Cc1c(Nc2c(C)cc(C)nc2)cncc1
0.0950014	CC1=CN=CC(Br)=C1	B25	COC1=NC=C(N)C=C1	A35	O(C)c1ncc(Nc2cc(C)cnc2)cc1
0.0549521	CC1=NC=CC(Br)=C1	B26	COC1=NC=C(N)C=C1	A35	O(C)c1ncc(Nc2cc(C)ncc2)cc1
0.351743	FC1=CC(Br)=NC=C1	B28	COC1=NC=C(N)C=C1	A35	Fc1cc(Nc2cnc(OC)cc2)ncc1
0.344236	FC1=CN=CC(Br)=C1	B29	COC1=NC=C(N)C=C1	A35	Fc1cc(Nc2cnc(OC)cc2)cnc1
0.371901	FC1=NC=CC(Br)=C1	B30	COC1=NC=C(N)C=C1	A35	Fc1nccc(Nc2cnc(OC)cc2)c1
0.266195	N#CC1=C(Br)C=NC=C1	B31	COC1=NC=C(N)C=C1	A35	O(C)c1ncc(Nc2c(C#N)ccnc2)cc1
0.00302954	CC1=CN=CC(Br)=C1	B25	N#CCC1=NC=CC=C1N	A36	N#CCc1c(Nc2cc(C)cnc2)cccn1
0.152429	CC1=NC=CC(Br)=C1	B26	N#CCC1=NC=CC=C1N	A36	N#CCc1c(Nc2cc(C)ncc2)cccn1
0.0388514	CC1=CC=CC(Br)=N1	B27	N#CCC1=NC=CC=C1N	A36	N#CCc1c(Nc2nc(C)ccc2)cccn1
0.00405268	FC1=CC(Br)=NC=C1	B28	N#CCC1=NC=CC=C1N	A36	Fc1cc(Nc2c(CC#N)nccc2)ncc1
0.0321876	CC1=NC=CC(Br)=C1	B26	O=C(C1=CC=CN=C1N)C	A37	O=C(C)c1c(Nc2cc(C)ncc2)nccc1
0.230818	FC1=CC(Br)=NC=C1	B28	O=C(C1=CC=CN=C1N)C	A37	Fc1cc(Nc2c(C(=O)C)cccn2)ncc1
0.097584	FC1=CN=CC(Br)=C1	B29	O=C(C1=CC=CN=C1N)C	A37	Fc1cc(Nc2c(C(=O)C)cccn2)cnc1
0.0521193	FC1=NC=CC(Br)=C1	B30	O=C(C1=CC=CN=C1N)C	A37	Fc1nccc(Nc2c(C(=O)C)cccn2)c1
0.0380962	CC1=CN=CC(Br)=C1	B25	CCOC1=NC=CC(N)=C1	A38	O(CC)c1nccc(Nc2cc(C)cnc2)c1
0.0832453	CC1=NC=CC(Br)=C1	B26	CCOC1=NC=CC(N)=C1	A38	O(CC)c1nccc(Nc2cc(C)ncc2)c1
0.285776	CC1=CC=CC(Br)=N1	B27	CCOC1=NC=CC(N)=C1	A38	O(CC)c1nccc(Nc2nc(C)ccc2)c1
0.218791	FC1=CC(Br)=NC=C1	B28	CCOC1=NC=CC(N)=C1	A38	Fc1cc(Nc2cc(OCC)ncc2)ncc1
0.282152	FC1=CN=CC(Br)=C1	B29	CCOC1=NC=CC(N)=C1	A38	Fc1cc(Nc2cc(OCC)ncc2)cnc1
0.130908	FC1=NC=CC(Br)=C1	B30	CCOC1=NC=CC(N)=C1	A38	Fc1nccc(Nc2cc(OCC)ncc2)c1
0.244633	N#CC1=C(Br)C=NC=C1	B31	CCOC1=NC=CC(N)=C1	A38	O(CC)c1nccc(Nc2c(C#N)ccnc2)c1
0.272789	CC1=CN=CC(Br)=C1	B25	CCOC1=CC(N)=NC=C1	A39	O(CC)c1cc(Nc2cc(C)cnc2)ncc1
0.138764	CC1=NC=CC(Br)=C1	B26	CCOC1=CC(N)=NC=C1	A39	O(CC)c1cc(Nc2cc(C)ncc2)ncc1
0.473365	CC1=CC=CC(Br)=N1	B27	CCOC1=CC(N)=NC=C1	A39	O(CC)c1cc(Nc2nc(C)ccc2)ncc1
0.340362	FC1=CC(Br)=NC=C1	B28	CCOC1=CC(N)=NC=C1	A39	Fc1cc(Nc2nccc(OCC)c2)ncc1
0.163592	FC1=CN=CC(Br)=C1	B29	CCOC1=CC(N)=NC=C1	A39	Fc1cc(Nc2nccc(OCC)c2)cnc1
0.191289	FC1=NC=CC(Br)=C1	B30	CCOC1=CC(N)=NC=C1	A39	Fc1nccc(Nc2nccc(OCC)c2)c1
0.0730549	N#CC1=C(Br)C=NC=C1	B31	CCOC1=CC(N)=NC=C1	A39	O(CC)c1cc(Nc2c(C#N)ccnc2)ncc1
0.155859	CC1=CN=CC(Br)=C1	B25	O=[N+](C1=CN=C(N)C=C1)[O-]	A40	O=[N+]([O-])c1cnc(Nc2cc(C)cnc2)cc1
0.0608071	CC1=NC=CC(Br)=C1	B26	O=[N+](C1=CN=C(N)C=C1)[O-]	A40	O=[N+]([O-])c1cnc(Nc2cc(C)ncc2)cc1
0.120551	CC1=CC=CC(Br)=N1	B27	O=[N+](C1=CN=C(N)C=C1)[O-]	A40	O=[N+]([O-])c1cnc(Nc2nc(C)ccc2)cc1
0.0593813	FC1=CC(Br)=NC=C1	B28	O=[N+](C1=CN=C(N)C=C1)[O-]	A40	Fc1cc(Nc2ncc([N+](=O)[O-])cc2)ncc1
0.274367	FC1=CN=CC(Br)=C1	B29	O=[N+](C1=CN=C(N)C=C1)[O-]	A40	Fc1cc(Nc2ncc([N+](=O)[O-])cc2)cnc1
0.263142	FC1=NC=CC(Br)=C1	B30	O=[N+](C1=CN=C(N)C=C1)[O-]	A40	Fc1nccc(Nc2ncc([N+](=O)[O-])cc2)c1
0.355692	CC1=CN=CC(Br)=C1	B25	O=C(OC)C1=CC=NC=C1N	A41	O=C(OC)c1c(Nc2cc(C)cnc2)cncc1
0.0556681	CC1=NC=CC(Br)=C1	B26	O=C(OC)C1=CC=NC=C1N	A41	O=C(OC)c1c(Nc2cc(C)ncc2)cncc1
0.117465	CC1=CC=CC(Br)=N1	B27	O=C(OC)C1=CC=NC=C1N	A41	O=C(OC)c1c(Nc2nc(C)ccc2)cncc1
0.152522	FC1=CN=CC(Br)=C1	B29	O=C(OC)C1=CC=NC=C1N	A41	Fc1cc(Nc2c(C(=O)OC)ccnc2)cnc1
0.0863317	FC1=NC=CC(Br)=C1	B30	O=C(OC)C1=CC=NC=C1N	A41	Fc1nccc(Nc2c(C(=O)OC)ccnc2)c1
0.0861359	N#CC1=C(Br)C=NC=C1	B31	O=C(OC)C1=CC=NC=C1N	A41	O=C(OC)c1c(Nc2c(C#N)ccnc2)cncc1
0.0464894	CC1=CN=CC(Br)=C1	B25	O=C(C1=C(N)C=CN=C1)OC	A42	O=C(OC)c1c(Nc2cc(C)cnc2)ccnc1
0.0241347	CC1=CC=CC(Br)=N1	B27	O=C(C1=C(N)C=CN=C1)OC	A42	O=C(OC)c1c(Nc2nc(C)ccc2)ccnc1
0.0310274	FC1=CN=CC(Br)=C1	B29	O=C(C1=C(N)C=CN=C1)OC	A42	Fc1cc(Nc2c(C(=O)OC)cncc2)cnc1
0.0119929	N#CC1=C(Br)C=NC=C1	B31	O=C(C1=C(N)C=CN=C1)OC	A42	O=C(OC)c1c(Nc2c(C#N)ccnc2)ccnc1
0.018507	CC1=CN=CC(Br)=C1	B25	O=C(C1=NC=CC(N)=C1)OC	A43	O=C(OC)c1nccc(Nc2cc(C)cnc2)c1
0.247037	CC1=CC=CC(Br)=N1	B27	O=C(C1=NC=CC(N)=C1)OC	A43	O=C(OC)c1nccc(Nc2nc(C)ccc2)c1
0.158318	FC1=CC(Br)=NC=C1	B28	O=C(C1=NC=CC(N)=C1)OC	A43	Fc1cc(Nc2cc(C(=O)OC)ncc2)ncc1
0.0261045	FC1=CN=CC(Br)=C1	B29	O=C(C1=NC=CC(N)=C1)OC	A43	Fc1cc(Nc2cc(C(=O)OC)ncc2)cnc1
0.139797	FC1=NC=CC(Br)=C1	B30	O=C(C1=NC=CC(N)=C1)OC	A43	Fc1nccc(Nc2cc(C(=O)OC)ncc2)c1
0.0213896	N#CC1=C(Br)C=NC=C1	B31	O=C(C1=NC=CC(N)=C1)OC	A43	O=C(OC)c1nccc(Nc2c(C#N)ccnc2)c1
0.304595	CC1=CN=CC(Br)=C1	B25	O=C(OC)C1=CC=NC(N)=C1	A44	O=C(OC)c1cc(Nc2cc(C)cnc2)ncc1
0.0765584	CC1=NC=CC(Br)=C1	B26	O=C(OC)C1=CC=NC(N)=C1	A44	O=C(OC)c1cc(Nc2cc(C)ncc2)ncc1
0.741454	CC1=CC=CC(Br)=N1	B27	O=C(OC)C1=CC=NC(N)=C1	A44	O=C(OC)c1cc(Nc2nc(C)ccc2)ncc1
0.503955	FC1=CC(Br)=NC=C1	B28	O=C(OC)C1=CC=NC(N)=C1	A44	Fc1cc(Nc2nccc(C(=O)OC)c2)ncc1
0.218599	FC1=CN=CC(Br)=C1	B29	O=C(OC)C1=CC=NC(N)=C1	A44	Fc1cc(Nc2nccc(C(=O)OC)c2)cnc1
0.229462	FC1=NC=CC(Br)=C1	B30	O=C(OC)C1=CC=NC(N)=C1	A44	Fc1nccc(Nc2nccc(C(=O)OC)c2)c1
0.0737166	N#CC1=C(Br)C=NC=C1	B31	O=C(OC)C1=CC=NC(N)=C1	A44	O=C(OC)c1cc(Nc2c(C#N)ccnc2)ncc1
0.0977278	CC1=NC=CC(Br)=C1	B26	NC1=NC=C(C(F)(F)F)C=C1	A45	FC(F)(F)c1cnc(Nc2cc(C)ncc2)cc1
0.67158	CC1=CC=CC(Br)=N1	B27	NC1=NC=C(C(F)(F)F)C=C1	A45	FC(F)(F)c1cnc(Nc2nc(C)ccc2)cc1
0.144375	FC1=CN=CC(Br)=C1	B29	NC1=NC=C(C(F)(F)F)C=C1	A45	FC(F)(F)c1cnc(Nc2cc(F)cnc2)cc1
0.150425	FC1=NC=CC(Br)=C1	B30	NC1=NC=C(C(F)(F)F)C=C1	A45	FC(F)(F)c1cnc(Nc2cc(F)ncc2)cc1
0.0364646	N#CC1=C(Br)C=NC=C1	B31	NC1=NC=C(C(F)(F)F)C=C1	A45	FC(F)(F)c1cnc(Nc2c(C#N)ccnc2)cc1
0.34054	CC1=CN=CC(Br)=C1	B25	FC(C1=NC=C(N)C=C1)(F)F	A46	FC(F)(F)c1ncc(Nc2cc(C)cnc2)cc1
0.0957266	CC1=NC=CC(Br)=C1	B26	FC(C1=NC=C(N)C=C1)(F)F	A46	FC(F)(F)c1ncc(Nc2cc(C)ncc2)cc1
0.21748	CC1=CC=CC(Br)=N1	B27	FC(C1=NC=C(N)C=C1)(F)F	A46	FC(F)(F)c1ncc(Nc2nc(C)ccc2)cc1
0.19115	FC1=CC(Br)=NC=C1	B28	FC(C1=NC=C(N)C=C1)(F)F	A46	FC(F)(F)c1ncc(Nc2nccc(F)c2)cc1
0.179763	FC1=CN=CC(Br)=C1	B29	FC(C1=NC=C(N)C=C1)(F)F	A46	FC(F)(F)c1ncc(Nc2cc(F)cnc2)cc1
0.145929	FC1=NC=CC(Br)=C1	B30	FC(C1=NC=C(N)C=C1)(F)F	A46	FC(F)(F)c1ncc(Nc2cc(F)ncc2)cc1
0.156567	N#CC1=C(Br)C=NC=C1	B31	FC(C1=NC=C(N)C=C1)(F)F	A46	FC(F)(F)c1ncc(Nc2c(C#N)ccnc2)cc1
0.30109	CC1=CN=CC(Br)=C1	B25	FC(C1=NC=CC(N)=C1)(F)F	A47	FC(F)(F)c1nccc(Nc2cc(C)cnc2)c1
0.0302852	CC1=NC=CC(Br)=C1	B26	FC(C1=NC=CC(N)=C1)(F)F	A47	FC(F)(F)c1nccc(Nc2cc(C)ncc2)c1
0.245266	CC1=CC=CC(Br)=N1	B27	FC(C1=NC=CC(N)=C1)(F)F	A47	FC(F)(F)c1nccc(Nc2nc(C)ccc2)c1
0.124909	FC1=CC(Br)=NC=C1	B28	FC(C1=NC=CC(N)=C1)(F)F	A47	FC(F)(F)c1nccc(Nc2nccc(F)c2)c1
0.186573	FC1=CN=CC(Br)=C1	B29	FC(C1=NC=CC(N)=C1)(F)F	A47	FC(F)(F)c1nccc(Nc2cc(F)cnc2)c1
0.0960789	FC1=NC=CC(Br)=C1	B30	FC(C1=NC=CC(N)=C1)(F)F	A47	FC(F)(F)c1nccc(Nc2cc(F)ncc2)c1
0.199925	N#CC1=C(Br)C=NC=C1	B31	FC(C1=NC=CC(N)=C1)(F)F	A47	FC(F)(F)c1nccc(Nc2c(C#N)ccnc2)c1
0.0430938	CC1=CN=CC(Br)=C1	B25	O=C(OCC)C1=NC=CC(N)=C1	A48	O=C(OCC)c1nccc(Nc2cc(C)cnc2)c1
0.0318664	CC1=NC=CC(Br)=C1	B26	O=C(OCC)C1=NC=CC(N)=C1	A48	O=C(OCC)c1nccc(Nc2cc(C)ncc2)c1
0.225381	CC1=CC=CC(Br)=N1	B27	O=C(OCC)C1=NC=CC(N)=C1	A48	O=C(OCC)c1nccc(Nc2nc(C)ccc2)c1
0.0927452	FC1=CC(Br)=NC=C1	B28	O=C(OCC)C1=NC=CC(N)=C1	A48	Fc1cc(Nc2cc(C(=O)OCC)ncc2)ncc1
0.122466	FC1=NC=CC(Br)=C1	B30	O=C(OCC)C1=NC=CC(N)=C1	A48	Fc1nccc(Nc2cc(C(=O)OCC)ncc2)c1
0.0214971	N#CC1=C(Br)C=NC=C1	B31	O=C(OCC)C1=NC=CC(N)=C1	A48	O=C(OCC)c1nccc(Nc2c(C#N)ccnc2)c1
0.894305	COC1=CN=C(Br)C=C1	B34	CC1=CN=C(N)C=C1	A25	O(C)c1cnc(Nc2ncc(C)cc2)cc1
0.243905	COC1=NC=CC(Br)=C1	B35	CC1=CN=C(N)C=C1	A25	O(C)c1nccc(Nc2ncc(C)cc2)c1
0.606825	COC1=CN=CC(Br)=C1	B36	CC1=CN=C(N)C=C1	A25	O(C)c1cc(Nc2ncc(C)cc2)cnc1
0.303599	BrC1=CN=CC(C(C)=O)=C1	B37	CC1=CN=C(N)C=C1	A25	O=C(C)c1cc(Nc2ncc(C)cc2)cnc1
0.720114	CN(C)C1=NC=CC(Br)=C1	B38	CC1=CN=C(N)C=C1	A25	N(C)(C)c1nccc(Nc2ncc(C)cc2)c1
0.612509	O=[N+](C1=CC(Br)=NC=C1)[O-]	B39	CC1=CN=C(N)C=C1	A25	O=[N+]([O-])c1cc(Nc2ncc(C)cc2)ncc1
0.00964063	O=[N+](C1=C(Br)C=NC=C1)[O-]	B40	CC1=CN=C(N)C=C1	A25	O=[N+]([O-])c1c(Nc2ncc(C)cc2)cncc1
0.0694237	COC1=CN=C(Br)C=C1	B34	CC1=C(N)C=NC=C1	A26	O(C)c1cnc(Nc2c(C)ccnc2)cc1
0.0418424	COC1=NC=CC(Br)=C1	B35	CC1=C(N)C=NC=C1	A26	O(C)c1nccc(Nc2c(C)ccnc2)c1
0.0495287	COC1=CN=CC(Br)=C1	B36	CC1=C(N)C=NC=C1	A26	O(C)c1cc(Nc2c(C)ccnc2)cnc1
0.623036	CN(C)C1=NC=CC(Br)=C1	B38	CC1=C(N)C=NC=C1	A26	N(C)(C)c1nccc(Nc2c(C)ccnc2)c1
0.154503	O=[N+](C1=CC(Br)=NC=C1)[O-]	B39	CC1=C(N)C=NC=C1	A26	O=[N+]([O-])c1cc(Nc2c(C)ccnc2)ncc1
0.036732	O=[N+](C1=C(Br)C=NC=C1)[O-]	B40	CC1=C(N)C=NC=C1	A26	O=[N+]([O-])c1c(Nc2c(C)ccnc2)cncc1
0.0799353	N#CC1=CN=C(Br)C=C1	B33	CC1=NC=CC(N)=C1	A27	N#Cc1cnc(Nc2cc(C)ncc2)cc1
0.0363829	COC1=CN=C(Br)C=C1	B34	CC1=NC=CC(N)=C1	A27	O(C)c1cnc(Nc2cc(C)ncc2)cc1
0.00748356	COC1=NC=CC(Br)=C1	B35	CC1=NC=CC(N)=C1	A27	O(C)c1nccc(Nc2cc(C)ncc2)c1
0.037051	COC1=CN=CC(Br)=C1	B36	CC1=NC=CC(N)=C1	A27	O(C)c1cc(Nc2cc(C)ncc2)cnc1
0.0230924	BrC1=CN=CC(C(C)=O)=C1	B37	CC1=NC=CC(N)=C1	A27	O=C(C)c1cc(Nc2cc(C)ncc2)cnc1
0.0198513	CN(C)C1=NC=CC(Br)=C1	B38	CC1=NC=CC(N)=C1	A27	N(C)(C)c1nccc(Nc2cc(C)ncc2)c1
0.0420016	O=[N+](C1=CC(Br)=NC=C1)[O-]	B39	CC1=NC=CC(N)=C1	A27	O=[N+]([O-])c1cc(Nc2cc(C)ncc2)ncc1
0.0364466	O=[N+](C1=C(Br)C=NC=C1)[O-]	B40	CC1=NC=CC(N)=C1	A27	O=[N+]([O-])c1c(Nc2cc(C)ncc2)cncc1
0.796513	COC1=CN=C(Br)C=C1	B34	FC1=CC=CC(N)=N1	A28	Fc1nc(Nc2ncc(OC)cc2)ccc1
0.31082	COC1=NC=CC(Br)=C1	B35	FC1=CC=CC(N)=N1	A28	Fc1nc(Nc2cc(OC)ncc2)ccc1
0.841053	COC1=CN=CC(Br)=C1	B36	FC1=CC=CC(N)=N1	A28	Fc1nc(Nc2cc(OC)cnc2)ccc1
0.31873	BrC1=CN=CC(C(C)=O)=C1	B37	FC1=CC=CC(N)=N1	A28	Fc1nc(Nc2cc(C(=O)C)cnc2)ccc1
0.227183	O=[N+](C1=CC(Br)=NC=C1)[O-]	B39	FC1=CC=CC(N)=N1	A28	Fc1nc(Nc2nccc([N+](=O)[O-])c2)ccc1
0.0182861	COC1=CN=C(Br)C=C1	B34	FC1=NC=C(N)C=C1	A29	Fc1ncc(Nc2ncc(OC)cc2)cc1
0.0164282	COC1=NC=CC(Br)=C1	B35	FC1=NC=C(N)C=C1	A29	Fc1ncc(Nc2cc(OC)ncc2)cc1
0.0146436	COC1=CN=CC(Br)=C1	B36	FC1=NC=C(N)C=C1	A29	Fc1ncc(Nc2cc(OC)cnc2)cc1
0.0461449	BrC1=CN=CC(C(C)=O)=C1	B37	FC1=NC=C(N)C=C1	A29	Fc1ncc(Nc2cc(C(=O)C)cnc2)cc1
0.0387623	CN(C)C1=NC=CC(Br)=C1	B38	FC1=NC=C(N)C=C1	A29	Fc1ncc(Nc2cc(N(C)C)ncc2)cc1
0.0600931	N#CC1=CN=C(Br)C=C1	B33	FC1=C(N)C=CN=C1	A30	Fc1c(Nc2ncc(C#N)cc2)ccnc1
0.481821	COC1=CN=C(Br)C=C1	B34	FC1=C(N)C=CN=C1	A30	Fc1c(Nc2ncc(OC)cc2)ccnc1
0.658926	COC1=CN=CC(Br)=C1	B36	FC1=C(N)C=CN=C1	A30	Fc1c(Nc2cc(OC)cnc2)ccnc1
0.334756	BrC1=CN=CC(C(C)=O)=C1	B37	FC1=C(N)C=CN=C1	A30	Fc1c(Nc2cc(C(=O)C)cnc2)ccnc1
0.435096	O=[N+](C1=CC(Br)=NC=C1)[O-]	B39	FC1=C(N)C=CN=C1	A30	Fc1c(Nc2nccc([N+](=O)[O-])c2)ccnc1
0.136452	N#CC1=CN=C(Br)C=C1	B33	N#CC1=CC(N)=NC=C1	A31	N#Cc1cc(Nc2ncc(C#N)cc2)ncc1
0.836684	COC1=CN=C(Br)C=C1	B34	N#CC1=CC(N)=NC=C1	A31	O(C)c1cnc(Nc2nccc(C#N)c2)cc1
0.0136431	COC1=NC=CC(Br)=C1	B35	N#CC1=CC(N)=NC=C1	A31	O(C)c1nccc(Nc2nccc(C#N)c2)c1
0.470045	COC1=CN=CC(Br)=C1	B36	N#CC1=CC(N)=NC=C1	A31	O(C)c1cc(Nc2nccc(C#N)c2)cnc1
0.222927	BrC1=CN=CC(C(C)=O)=C1	B37	N#CC1=CC(N)=NC=C1	A31	O=C(C)c1cc(Nc2nccc(C#N)c2)cnc1
0.234629	CN(C)C1=NC=CC(Br)=C1	B38	N#CC1=CC(N)=NC=C1	A31	N#Cc1cc(Nc2cc(N(C)C)ncc2)ncc1
0.0143702	O=[N+](C1=CC(Br)=NC=C1)[O-]	B39	N#CC1=CC(N)=NC=C1	A31	O=[N+]([O-])c1cc(Nc2nccc(C#N)c2)ncc1
0.00117532	O=[N+](C1=C(Br)C=NC=C1)[O-]	B40	N#CC1=CC(N)=NC=C1	A31	O=[N+]([O-])c1c(Nc2nccc(C#N)c2)cncc1
0.0632168	N#CC1=CN=C(Br)C=C1	B33	N#CC1=NC=CC(N)=C1	A32	N#Cc1nccc(Nc2ncc(C#N)cc2)c1
0.261495	COC1=CN=C(Br)C=C1	B34	N#CC1=NC=CC(N)=C1	A32	O(C)c1cnc(Nc2cc(C#N)ncc2)cc1
0.224502	COC1=NC=CC(Br)=C1	B35	N#CC1=NC=CC(N)=C1	A32	O(C)c1nccc(Nc2cc(C#N)ncc2)c1
0.33612	COC1=CN=CC(Br)=C1	B36	N#CC1=NC=CC(N)=C1	A32	O(C)c1cc(Nc2cc(C#N)ncc2)cnc1
0.271258	BrC1=CN=CC(C(C)=O)=C1	B37	N#CC1=NC=CC(N)=C1	A32	O=C(C)c1cc(Nc2cc(C#N)ncc2)cnc1
0.0875216	CN(C)C1=NC=CC(Br)=C1	B38	N#CC1=NC=CC(N)=C1	A32	N#Cc1nccc(Nc2cc(N(C)C)ncc2)c1
0.0942788	O=[N+](C1=CC(Br)=NC=C1)[O-]	B39	N#CC1=NC=CC(N)=C1	A32	O=[N+]([O-])c1cc(Nc2cc(C#N)ncc2)ncc1
0.0153885	O=[N+](C1=C(Br)C=NC=C1)[O-]	B40	N#CC1=NC=CC(N)=C1	A32	O=[N+]([O-])c1c(Nc2cc(C#N)ncc2)cncc1
0.0216678	N#CC1=CN=C(Br)C=C1	B33	CC1=CC(C)=C(N)C=N1	A33	N#Cc1cnc(Nc2c(C)cc(C)nc2)cc1
0.149978	COC1=CN=C(Br)C=C1	B34	CC1=CC(C)=C(N)C=N1	A33	O(C)c1cnc(Nc2c(C)cc(C)nc2)cc1
0.0664925	COC1=CN=CC(Br)=C1	B36	CC1=CC(C)=C(N)C=N1	A33	O(C)c1cc(Nc2c(C)cc(C)nc2)cnc1
0.0317649	BrC1=CN=CC(C(C)=O)=C1	B37	CC1=CC(C)=C(N)C=N1	A33	O=C(C)c1cc(Nc2c(C)cc(C)nc2)cnc1
0.298553	O=[N+](C1=CC(Br)=NC=C1)[O-]	B39	CC1=CC(C)=C(N)C=N1	A33	O=[N+]([O-])c1cc(Nc2c(C)cc(C)nc2)ncc1
0.0319527	O=[N+](C1=C(Br)C=NC=C1)[O-]	B40	CC1=CC(C)=C(N)C=N1	A33	O=[N+]([O-])c1c(Nc2c(C)cc(C)nc2)cncc1
0.862936	BrC1=CN=CC(C(C)=O)=C1	B37	O=CC1=C(N)C=NC=C1	A34	O=C(C)c1cc(Nc2c(C=O)ccnc2)cnc1
0.128723	N#CC1=CN=C(Br)C=C1	B33	COC1=NC=C(N)C=C1	A35	O(C)c1ncc(Nc2ncc(C#N)cc2)cc1
0.503461	COC1=CN=C(Br)C=C1	B34	COC1=NC=C(N)C=C1	A35	O(C)c1ncc(Nc2ncc(OC)cc2)cc1
0.0590946	COC1=NC=CC(Br)=C1	B35	COC1=NC=C(N)C=C1	A35	O(C)c1nccc(Nc2cnc(OC)cc2)c1
0.607998	COC1=CN=CC(Br)=C1	B36	COC1=NC=C(N)C=C1	A35	O(C)c1ncc(Nc2cc(OC)cnc2)cc1
0.365135	BrC1=CN=CC(C(C)=O)=C1	B37	COC1=NC=C(N)C=C1	A35	O=C(C)c1cc(Nc2cnc(OC)cc2)cnc1
0.301573	CN(C)C1=NC=CC(Br)=C1	B38	COC1=NC=C(N)C=C1	A35	O(C)c1ncc(Nc2cc(N(C)C)ncc2)cc1
0.237929	O=[N+](C1=CC(Br)=NC=C1)[O-]	B39	COC1=NC=C(N)C=C1	A35	O=[N+]([O-])c1cc(Nc2cnc(OC)cc2)ncc1
0.00187338	O=[N+](C1=C(Br)C=NC=C1)[O-]	B40	COC1=NC=C(N)C=C1	A35	O=[N+]([O-])c1c(Nc2cnc(OC)cc2)cncc1
0.0162706	N#CC1=CN=C(Br)C=C1	B33	N#CCC1=NC=CC=C1N	A36	N#CCc1c(Nc2ncc(C#N)cc2)cccn1
0.0250157	COC1=CN=C(Br)C=C1	B34	N#CCC1=NC=CC=C1N	A36	O(C)c1cnc(Nc2c(CC#N)nccc2)cc1
0.0922685	COC1=NC=CC(Br)=C1	B35	O=C(C1=CC=CN=C1N)C	A37	O=C(C)c1c(Nc2cc(OC)ncc2)nccc1
0.251008	COC1=CN=CC(Br)=C1	B36	O=C(C1=CC=CN=C1N)C	A37	O=C(C)c1c(Nc2cc(OC)cnc2)nccc1
0.189283	BrC1=CN=CC(C(C)=O)=C1	B37	O=C(C1=CC=CN=C1N)C	A37	O=C(C)c1c(Nc2cc(C(=O)C)cnc2)nccc1
0.157691	CN(C)C1=NC=CC(Br)=C1	B38	O=C(C1=CC=CN=C1N)C	A37	O=C(C)c1c(Nc2cc(N(C)C)ncc2)nccc1
0.00230353	O=[N+](C1=CC(Br)=NC=C1)[O-]	B39	O=C(C1=CC=CN=C1N)C	A37	O=[N+]([O-])c1cc(Nc2c(C(=O)C)cccn2)ncc1
0.00414596	O=[N+](C1=C(Br)C=NC=C1)[O-]	B40	O=C(C1=CC=CN=C1N)C	A37	O=[N+]([O-])c1c(Nc2c(C(=O)C)cccn2)cncc1
0.0519646	N#CC1=CN=C(Br)C=C1	B33	CCOC1=NC=CC(N)=C1	A38	O(CC)c1nccc(Nc2ncc(C#N)cc2)c1
0.262449	COC1=CN=C(Br)C=C1	B34	CCOC1=NC=CC(N)=C1	A38	O(CC)c1nccc(Nc2ncc(OC)cc2)c1
0.153262	COC1=NC=CC(Br)=C1	B35	CCOC1=NC=CC(N)=C1	A38	O(CC)c1nccc(Nc2cc(OC)ncc2)c1
0.120141	O=[N+](C1=CC(Br)=NC=C1)[O-]	B39	CCOC1=NC=CC(N)=C1	A38	O=[N+]([O-])c1cc(Nc2cc(OCC)ncc2)ncc1
0.234518	N#CC1=CN=C(Br)C=C1	B33	CCOC1=CC(N)=NC=C1	A39	O(CC)c1cc(Nc2ncc(C#N)cc2)ncc1
0.502703	COC1=CN=C(Br)C=C1	B34	CCOC1=CC(N)=NC=C1	A39	O(CC)c1cc(Nc2ncc(OC)cc2)ncc1
0.198788	COC1=NC=CC(Br)=C1	B35	CCOC1=CC(N)=NC=C1	A39	O(CC)c1cc(Nc2cc(OC)ncc2)ncc1
0.257863	COC1=CN=CC(Br)=C1	B36	CCOC1=CC(N)=NC=C1	A39	O(CC)c1cc(Nc2cc(OC)cnc2)ncc1
0.182936	BrC1=CN=CC(C(C)=O)=C1	B37	CCOC1=CC(N)=NC=C1	A39	O=C(C)c1cc(Nc2nccc(OCC)c2)cnc1
0.529771	CN(C)C1=NC=CC(Br)=C1	B38	CCOC1=CC(N)=NC=C1	A39	O(CC)c1cc(Nc2cc(N(C)C)ncc2)ncc1
0.307592	O=[N+](C1=CC(Br)=NC=C1)[O-]	B39	CCOC1=CC(N)=NC=C1	A39	O=[N+]([O-])c1cc(Nc2nccc(OCC)c2)ncc1
0.0111565	O=[N+](C1=C(Br)C=NC=C1)[O-]	B40	CCOC1=CC(N)=NC=C1	A39	O=[N+]([O-])c1c(Nc2nccc(OCC)c2)cncc1
0.252244	N#CC1=CN=C(Br)C=C1	B33	O=[N+](C1=CN=C(N)C=C1)[O-]	A40	O=[N+]([O-])c1cnc(Nc2ncc(C#N)cc2)cc1
0.183352	COC1=CN=C(Br)C=C1	B34	O=[N+](C1=CN=C(N)C=C1)[O-]	A40	O=[N+]([O-])c1cnc(Nc2ncc(OC)cc2)cc1
0.225871	COC1=NC=CC(Br)=C1	B35	O=[N+](C1=CN=C(N)C=C1)[O-]	A40	O=[N+]([O-])c1cnc(Nc2cc(OC)ncc2)cc1
0.216159	COC1=CN=CC(Br)=C1	B36	O=[N+](C1=CN=C(N)C=C1)[O-]	A40	O=[N+]([O-])c1cnc(Nc2cc(OC)cnc2)cc1
0.230099	BrC1=CN=CC(C(C)=O)=C1	B37	O=[N+](C1=CN=C(N)C=C1)[O-]	A40	O=[N+]([O-])c1cnc(Nc2cc(C(=O)C)cnc2)cc1
0.363989	CN(C)C1=NC=CC(Br)=C1	B38	O=[N+](C1=CN=C(N)C=C1)[O-]	A40	O=[N+]([O-])c1cnc(Nc2cc(N(C)C)ncc2)cc1
0.26491	O=[N+](C1=CC(Br)=NC=C1)[O-]	B39	O=[N+](C1=CN=C(N)C=C1)[O-]	A40	O=[N+]([O-])c1cc(Nc2ncc([N+](=O)[O-])cc2)ncc1
0.0509919	O=[N+](C1=C(Br)C=NC=C1)[O-]	B40	O=[N+](C1=CN=C(N)C=C1)[O-]	A40	O=[N+]([O-])c1c(Nc2ncc([N+](=O)[O-])cc2)cncc1
0.154883	COC1=NC=CC(Br)=C1	B35	O=C(OC)C1=CC=NC=C1N	A41	O=C(OC)c1c(Nc2cc(OC)ncc2)cncc1
0.128369	COC1=CN=CC(Br)=C1	B36	O=C(OC)C1=CC=NC=C1N	A41	O=C(OC)c1c(Nc2cc(OC)cnc2)cncc1
0.0834109	BrC1=CN=CC(C(C)=O)=C1	B37	O=C(OC)C1=CC=NC=C1N	A41	O=C(OC)c1c(Nc2cc(C(=O)C)cnc2)cncc1
0.0619452	CN(C)C1=NC=CC(Br)=C1	B38	O=C(OC)C1=CC=NC=C1N	A41	O=C(OC)c1c(Nc2cc(N(C)C)ncc2)cncc1
0.0271407	N#CC1=CN=C(Br)C=C1	B33	O=C(C1=C(N)C=CN=C1)OC	A42	O=C(OC)c1c(Nc2ncc(C#N)cc2)ccnc1
0.0991854	COC1=NC=CC(Br)=C1	B35	O=C(C1=C(N)C=CN=C1)OC	A42	O=C(OC)c1c(Nc2cc(OC)ncc2)ccnc1
0.0380655	COC1=CN=CC(Br)=C1	B36	O=C(C1=C(N)C=CN=C1)OC	A42	O=C(OC)c1c(Nc2cc(OC)cnc2)ccnc1
0.0233576	BrC1=CN=CC(C(C)=O)=C1	B37	O=C(C1=C(N)C=CN=C1)OC	A42	O=C(OC)c1c(Nc2cc(C(=O)C)cnc2)ccnc1
0.0114472	N#CC1=CN=C(Br)C=C1	B33	O=C(C1=NC=CC(N)=C1)OC	A43	O=C(OC)c1nccc(Nc2ncc(C#N)cc2)c1
0.223612	COC1=CN=C(Br)C=C1	B34	O=C(C1=NC=CC(N)=C1)OC	A43	O=C(OC)c1nccc(Nc2ncc(OC)cc2)c1
0.0264906	COC1=CN=CC(Br)=C1	B36	O=C(C1=NC=CC(N)=C1)OC	A43	O=C(OC)c1nccc(Nc2cc(OC)cnc2)c1
0.0197468	BrC1=CN=CC(C(C)=O)=C1	B37	O=C(C1=NC=CC(N)=C1)OC	A43	O=C(OC)c1nccc(Nc2cc(C(=O)C)cnc2)c1
0.0744211	O=[N+](C1=CC(Br)=NC=C1)[O-]	B39	O=C(C1=NC=CC(N)=C1)OC	A43	O=[N+]([O-])c1cc(Nc2cc(C(=O)OC)ncc2)ncc1
0.0616117	O=[N+](C1=C(Br)C=NC=C1)[O-]	B40	O=C(C1=NC=CC(N)=C1)OC	A43	O=[N+]([O-])c1c(Nc2cc(C(=O)OC)ncc2)cncc1
0.164134	N#CC1=CN=C(Br)C=C1	B33	O=C(OC)C1=CC=NC(N)=C1	A44	O=C(OC)c1cc(Nc2ncc(C#N)cc2)ncc1
0.821425	COC1=CN=C(Br)C=C1	B34	O=C(OC)C1=CC=NC(N)=C1	A44	O=C(OC)c1cc(Nc2ncc(OC)cc2)ncc1
0.101064	COC1=NC=CC(Br)=C1	B35	O=C(OC)C1=CC=NC(N)=C1	A44	O=C(OC)c1cc(Nc2cc(OC)ncc2)ncc1
0.387311	COC1=CN=CC(Br)=C1	B36	O=C(OC)C1=CC=NC(N)=C1	A44	O=C(OC)c1cc(Nc2cc(OC)cnc2)ncc1
0.158176	BrC1=CN=CC(C(C)=O)=C1	B37	O=C(OC)C1=CC=NC(N)=C1	A44	O=C(OC)c1cc(Nc2cc(C(=O)C)cnc2)ncc1
0.187654	O=[N+](C1=CC(Br)=NC=C1)[O-]	B39	O=C(OC)C1=CC=NC(N)=C1	A44	O=[N+]([O-])c1cc(Nc2nccc(C(=O)OC)c2)ncc1
0.0129003	O=[N+](C1=C(Br)C=NC=C1)[O-]	B40	O=C(OC)C1=CC=NC(N)=C1	A44	O=[N+]([O-])c1c(Nc2nccc(C(=O)OC)c2)cncc1
0.0745746	N#CC1=CN=C(Br)C=C1	B33	NC1=NC=C(C(F)(F)F)C=C1	A45	FC(F)(F)c1cnc(Nc2ncc(C#N)cc2)cc1
0.70675	COC1=CN=C(Br)C=C1	B34	NC1=NC=C(C(F)(F)F)C=C1	A45	FC(F)(F)c1cnc(Nc2ncc(OC)cc2)cc1
0.132748	COC1=NC=CC(Br)=C1	B35	NC1=NC=C(C(F)(F)F)C=C1	A45	FC(F)(F)c1cnc(Nc2cc(OC)ncc2)cc1
0.327149	COC1=CN=CC(Br)=C1	B36	NC1=NC=C(C(F)(F)F)C=C1	A45	FC(F)(F)c1cnc(Nc2cc(OC)cnc2)cc1
0.166523	BrC1=CN=CC(C(C)=O)=C1	B37	NC1=NC=C(C(F)(F)F)C=C1	A45	FC(F)(F)c1cnc(Nc2cc(C(=O)C)cnc2)cc1
0.434336	CN(C)C1=NC=CC(Br)=C1	B38	NC1=NC=C(C(F)(F)F)C=C1	A45	FC(F)(F)c1cnc(Nc2cc(N(C)C)ncc2)cc1
0.217629	O=[N+](C1=CC(Br)=NC=C1)[O-]	B39	NC1=NC=C(C(F)(F)F)C=C1	A45	FC(F)(F)c1cnc(Nc2nccc([N+](=O)[O-])c2)cc1
0.109933	N#CC1=CN=C(Br)C=C1	B33	FC(C1=NC=C(N)C=C1)(F)F	A46	FC(F)(F)c1ncc(Nc2ncc(C#N)cc2)cc1
0.174812	COC1=CN=C(Br)C=C1	B34	FC(C1=NC=C(N)C=C1)(F)F	A46	FC(F)(F)c1ncc(Nc2ncc(OC)cc2)cc1
0.213194	COC1=NC=CC(Br)=C1	B35	FC(C1=NC=C(N)C=C1)(F)F	A46	FC(F)(F)c1ncc(Nc2cc(OC)ncc2)cc1
0.317971	COC1=CN=CC(Br)=C1	B36	FC(C1=NC=C(N)C=C1)(F)F	A46	FC(F)(F)c1ncc(Nc2cc(OC)cnc2)cc1
0.271354	BrC1=CN=CC(C(C)=O)=C1	B37	FC(C1=NC=C(N)C=C1)(F)F	A46	FC(F)(F)c1ncc(Nc2cc(C(=O)C)cnc2)cc1
0.0117627	O=[N+](C1=CC(Br)=NC=C1)[O-]	B39	FC(C1=NC=C(N)C=C1)(F)F	A46	FC(F)(F)c1ncc(Nc2nccc([N+](=O)[O-])c2)cc1
0.00740558	O=[N+](C1=C(Br)C=NC=C1)[O-]	B40	FC(C1=NC=C(N)C=C1)(F)F	A46	FC(F)(F)c1ncc(Nc2c([N+](=O)[O-])ccnc2)cc1
0.0373386	N#CC1=CN=C(Br)C=C1	B33	FC(C1=NC=CC(N)=C1)(F)F	A47	FC(F)(F)c1nccc(Nc2ncc(C#N)cc2)c1
0.192117	COC1=CN=C(Br)C=C1	B34	FC(C1=NC=CC(N)=C1)(F)F	A47	FC(F)(F)c1nccc(Nc2ncc(OC)cc2)c1
0.120874	COC1=NC=CC(Br)=C1	B35	FC(C1=NC=CC(N)=C1)(F)F	A47	FC(F)(F)c1nccc(Nc2cc(OC)ncc2)c1
0.333565	COC1=CN=CC(Br)=C1	B36	FC(C1=NC=CC(N)=C1)(F)F	A47	FC(F)(F)c1nccc(Nc2cc(OC)cnc2)c1
0.245973	BrC1=CN=CC(C(C)=O)=C1	B37	FC(C1=NC=CC(N)=C1)(F)F	A47	FC(F)(F)c1nccc(Nc2cc(C(=O)C)cnc2)c1
0.0745345	O=[N+](C1=CC(Br)=NC=C1)[O-]	B39	FC(C1=NC=CC(N)=C1)(F)F	A47	FC(F)(F)c1nccc(Nc2nccc([N+](=O)[O-])c2)c1
0.00481345	O=[N+](C1=C(Br)C=NC=C1)[O-]	B40	FC(C1=NC=CC(N)=C1)(F)F	A47	FC(F)(F)c1nccc(Nc2c([N+](=O)[O-])ccnc2)c1
0.0293779	N#CC1=CN=C(Br)C=C1	B33	O=C(OCC)C1=NC=CC(N)=C1	A48	O=C(OCC)c1nccc(Nc2ncc(C#N)cc2)c1
0.293685	COC1=CN=C(Br)C=C1	B34	O=C(OCC)C1=NC=CC(N)=C1	A48	O=C(OCC)c1nccc(Nc2ncc(OC)cc2)c1
0.218341	COC1=NC=CC(Br)=C1	B35	O=C(OCC)C1=NC=CC(N)=C1	A48	O=C(OCC)c1nccc(Nc2cc(OC)ncc2)c1
0.0905884	CN(C)C1=NC=CC(Br)=C1	B38	O=C(OCC)C1=NC=CC(N)=C1	A48	O=C(OCC)c1nccc(Nc2cc(N(C)C)ncc2)c1
0.0535182	O=[N+](C1=CC(Br)=NC=C1)[O-]	B39	O=C(OCC)C1=NC=CC(N)=C1	A48	O=[N+]([O-])c1cc(Nc2cc(C(=O)OCC)ncc2)ncc1
0.369095	O=C(OC)C1=CN=C(Br)C=C1	B42	CC1=CN=C(N)C=C1	A25	O=C(OC)c1cnc(Nc2ncc(C)cc2)cc1
0.140561	CC1=CC(Br)=CC(C)=N1	B43	CC1=CN=C(N)C=C1	A25	N(c1ncc(C)cc1)c1cc(C)nc(C)c1
0.155923	FC(C1=NC=C(Br)C=C1)(F)F	B45	CC1=CN=C(N)C=C1	A25	FC(F)(F)c1ncc(Nc2ncc(C)cc2)cc1
0.135	FC(C1=NC=CC(Br)=C1)(F)F	B46	CC1=CN=C(N)C=C1	A25	FC(F)(F)c1nccc(Nc2ncc(C)cc2)c1
0.082917	FC(C1=NC=CC=C1Br)(F)F	B47	CC1=CN=C(N)C=C1	A25	FC(F)(F)c1c(Nc2ncc(C)cc2)cccn1
0.174508	O=C(OCC)C1=NC=CC(Br)=C1	B48	CC1=CN=C(N)C=C1	A25	O=C(OCC)c1nccc(Nc2ncc(C)cc2)c1
0.188466	FC(C1=CC=CC(Br)=N1)F	B41	CC1=C(N)C=NC=C1	A26	FC(F)c1nc(Nc2c(C)ccnc2)ccc1
0.0724321	O=C(OC)C1=CN=C(Br)C=C1	B42	CC1=C(N)C=NC=C1	A26	O=C(OC)c1cnc(Nc2c(C)ccnc2)cc1
0.331877	CC1=CC(Br)=CC(C)=N1	B43	CC1=C(N)C=NC=C1	A26	N(c1c(C)ccnc1)c1cc(C)nc(C)c1
0.109217	FC(C1=CC(Br)=NC=C1)(F)F	B44	CC1=C(N)C=NC=C1	A26	FC(F)(F)c1cc(Nc2c(C)ccnc2)ncc1
0.150092	FC(C1=NC=C(Br)C=C1)(F)F	B45	CC1=C(N)C=NC=C1	A26	FC(F)(F)c1ncc(Nc2c(C)ccnc2)cc1
0.152632	FC(C1=NC=CC(Br)=C1)(F)F	B46	CC1=C(N)C=NC=C1	A26	FC(F)(F)c1nccc(Nc2c(C)ccnc2)c1
0.0547409	FC(C1=NC=CC=C1Br)(F)F	B47	CC1=C(N)C=NC=C1	A26	FC(F)(F)c1c(Nc2c(C)ccnc2)cccn1
0.25326	O=C(OCC)C1=NC=CC(Br)=C1	B48	CC1=C(N)C=NC=C1	A26	O=C(OCC)c1nccc(Nc2c(C)ccnc2)c1
0.154386	FC(C1=CC=CC(Br)=N1)F	B41	CC1=NC=CC(N)=C1	A27	FC(F)c1nc(Nc2cc(C)ncc2)ccc1
0.209064	O=C(OC)C1=CN=C(Br)C=C1	B42	CC1=NC=CC(N)=C1	A27	O=C(OC)c1cnc(Nc2cc(C)ncc2)cc1
0.191307	CC1=CC(Br)=CC(C)=N1	B43	CC1=NC=CC(N)=C1	A27	N(c1cc(C)nc(C)c1)c1cc(C)ncc1
0.117605	FC(C1=CC(Br)=NC=C1)(F)F	B44	CC1=NC=CC(N)=C1	A27	FC(F)(F)c1cc(Nc2cc(C)ncc2)ncc1
0.121124	FC(C1=NC=C(Br)C=C1)(F)F	B45	CC1=NC=CC(N)=C1	A27	FC(F)(F)c1ncc(Nc2cc(C)ncc2)cc1
0.15139	FC(C1=NC=CC(Br)=C1)(F)F	B46	CC1=NC=CC(N)=C1	A27	FC(F)(F)c1nccc(Nc2cc(C)ncc2)c1
0.249774	FC(C1=NC=CC=C1Br)(F)F	B47	CC1=NC=CC(N)=C1	A27	FC(F)(F)c1c(Nc2cc(C)ncc2)cccn1
0.306906	O=C(OCC)C1=NC=CC(Br)=C1	B48	CC1=NC=CC(N)=C1	A27	O=C(OCC)c1nccc(Nc2cc(C)ncc2)c1
0.250437	FC(C1=CC(Br)=NC=C1)(F)F	B44	FC1=CC=CC(N)=N1	A28	FC(F)(F)c1cc(Nc2nc(F)ccc2)ncc1
0.238231	FC(C1=NC=CC(Br)=C1)(F)F	B46	FC1=CC=CC(N)=N1	A28	FC(F)(F)c1nccc(Nc2nc(F)ccc2)c1
0.128192	FC(C1=NC=CC=C1Br)(F)F	B47	FC1=CC=CC(N)=N1	A28	FC(F)(F)c1c(Nc2nc(F)ccc2)cccn1
0.230668	O=C(OCC)C1=NC=CC(Br)=C1	B48	FC1=CC=CC(N)=N1	A28	Fc1nc(Nc2cc(C(=O)OCC)ncc2)ccc1
0.168195	FC(C1=CC=CC(Br)=N1)F	B41	FC1=NC=C(N)C=C1	A29	FC(F)c1nc(Nc2cnc(F)cc2)ccc1
0.0483168	FC(C1=CC(Br)=NC=C1)(F)F	B44	FC1=NC=C(N)C=C1	A29	FC(F)(F)c1cc(Nc2cnc(F)cc2)ncc1
0.157195	FC(C1=NC=C(Br)C=C1)(F)F	B45	FC1=NC=C(N)C=C1	A29	FC(F)(F)c1ncc(Nc2cnc(F)cc2)cc1
0.073135	FC(C1=NC=CC(Br)=C1)(F)F	B46	FC1=NC=C(N)C=C1	A29	FC(F)(F)c1nccc(Nc2cnc(F)cc2)c1
0.131866	FC(C1=NC=CC=C1Br)(F)F	B47	FC1=NC=C(N)C=C1	A29	FC(F)(F)c1c(Nc2cnc(F)cc2)cccn1
0.340592	FC(C1=CC=CC(Br)=N1)F	B41	FC1=C(N)C=CN=C1	A30	FC(F)c1nc(Nc2c(F)cncc2)ccc1
0.0928464	O=C(OC)C1=CN=C(Br)C=C1	B42	FC1=C(N)C=CN=C1	A30	Fc1c(Nc2ncc(C(=O)OC)cc2)ccnc1
0.0348772	CC1=CC(Br)=CC(C)=N1	B43	FC1=C(N)C=CN=C1	A30	Fc1c(Nc2cc(C)nc(C)c2)ccnc1
0.305951	FC(C1=CC(Br)=NC=C1)(F)F	B44	FC1=C(N)C=CN=C1	A30	FC(F)(F)c1cc(Nc2c(F)cncc2)ncc1
0.170101	FC(C1=NC=C(Br)C=C1)(F)F	B45	FC1=C(N)C=CN=C1	A30	FC(F)(F)c1ncc(Nc2c(F)cncc2)cc1
0.160552	FC(C1=NC=CC(Br)=C1)(F)F	B46	FC1=C(N)C=CN=C1	A30	FC(F)(F)c1nccc(Nc2c(F)cncc2)c1
0.110727	FC(C1=NC=CC=C1Br)(F)F	B47	FC1=C(N)C=CN=C1	A30	FC(F)(F)c1c(Nc2c(F)cncc2)cccn1
0.115784	O=C(OCC)C1=NC=CC(Br)=C1	B48	FC1=C(N)C=CN=C1	A30	Fc1c(Nc2cc(C(=O)OCC)ncc2)ccnc1
0.274626	FC(C1=CC=CC(Br)=N1)F	B41	N#CC1=CC(N)=NC=C1	A31	FC(F)c1nc(Nc2nccc(C#N)c2)ccc1
0.124971	O=C(OC)C1=CN=C(Br)C=C1	B42	N#CC1=CC(N)=NC=C1	A31	O=C(OC)c1cnc(Nc2nccc(C#N)c2)cc1
0.0451491	CC1=CC(Br)=CC(C)=N1	B43	N#CC1=CC(N)=NC=C1	A31	N#Cc1cc(Nc2cc(C)nc(C)c2)ncc1
0.113157	FC(C1=NC=C(Br)C=C1)(F)F	B45	N#CC1=CC(N)=NC=C1	A31	FC(F)(F)c1ncc(Nc2nccc(C#N)c2)cc1
0.0719282	FC(C1=NC=CC(Br)=C1)(F)F	B46	N#CC1=CC(N)=NC=C1	A31	FC(F)(F)c1nccc(Nc2nccc(C#N)c2)c1
0.093257	FC(C1=NC=CC=C1Br)(F)F	B47	N#CC1=CC(N)=NC=C1	A31	FC(F)(F)c1c(Nc2nccc(C#N)c2)cccn1
0.0914071	O=C(OCC)C1=NC=CC(Br)=C1	B48	N#CC1=CC(N)=NC=C1	A31	O=C(OCC)c1nccc(Nc2nccc(C#N)c2)c1
0.226759	FC(C1=CC=CC(Br)=N1)F	B41	N#CC1=NC=CC(N)=C1	A32	FC(F)c1nc(Nc2cc(C#N)ncc2)ccc1
0.0230078	O=C(OC)C1=CN=C(Br)C=C1	B42	N#CC1=NC=CC(N)=C1	A32	O=C(OC)c1cnc(Nc2cc(C#N)ncc2)cc1
0.0762673	FC(C1=CC(Br)=NC=C1)(F)F	B44	N#CC1=NC=CC(N)=C1	A32	FC(F)(F)c1cc(Nc2cc(C#N)ncc2)ncc1
0.149318	FC(C1=NC=C(Br)C=C1)(F)F	B45	N#CC1=NC=CC(N)=C1	A32	FC(F)(F)c1ncc(Nc2cc(C#N)ncc2)cc1
0.101454	FC(C1=NC=CC(Br)=C1)(F)F	B46	N#CC1=NC=CC(N)=C1	A32	FC(F)(F)c1nccc(Nc2cc(C#N)ncc2)c1
0.118025	FC(C1=NC=CC=C1Br)(F)F	B47	N#CC1=NC=CC(N)=C1	A32	FC(F)(F)c1c(Nc2cc(C#N)ncc2)cccn1
0.209851	O=C(OCC)C1=NC=CC(Br)=C1	B48	N#CC1=NC=CC(N)=C1	A32	O=C(OCC)c1nccc(Nc2cc(C#N)ncc2)c1
0.321124	FC(C1=CC=CC(Br)=N1)F	B41	CC1=CC(C)=C(N)C=N1	A33	FC(F)c1nc(Nc2c(C)cc(C)nc2)ccc1
0.158068	O=C(OC)C1=CN=C(Br)C=C1	B42	CC1=CC(C)=C(N)C=N1	A33	O=C(OC)c1cnc(Nc2c(C)cc(C)nc2)cc1
0.303077	CC1=CC(Br)=CC(C)=N1	B43	CC1=CC(C)=C(N)C=N1	A33	N(c1c(C)cc(C)nc1)c1cc(C)nc(C)c1
0.119223	FC(C1=CC(Br)=NC=C1)(F)F	B44	CC1=CC(C)=C(N)C=N1	A33	FC(F)(F)c1cc(Nc2c(C)cc(C)nc2)ncc1
0.234274	FC(C1=NC=C(Br)C=C1)(F)F	B45	CC1=CC(C)=C(N)C=N1	A33	FC(F)(F)c1ncc(Nc2c(C)cc(C)nc2)cc1
0.240617	FC(C1=NC=CC(Br)=C1)(F)F	B46	CC1=CC(C)=C(N)C=N1	A33	FC(F)(F)c1nccc(Nc2c(C)cc(C)nc2)c1
0.0801769	FC(C1=NC=CC=C1Br)(F)F	B47	CC1=CC(C)=C(N)C=N1	A33	FC(F)(F)c1c(Nc2c(C)cc(C)nc2)cccn1
0.248419	O=C(OCC)C1=NC=CC(Br)=C1	B48	CC1=CC(C)=C(N)C=N1	A33	O=C(OCC)c1nccc(Nc2c(C)cc(C)nc2)c1
0.0171552	FC(C1=NC=CC=C1Br)(F)F	B47	O=CC1=C(N)C=NC=C1	A34	FC(F)(F)c1c(Nc2c(C=O)ccnc2)cccn1
0.323775	FC(C1=CC=CC(Br)=N1)F	B41	COC1=NC=C(N)C=C1	A35	FC(F)c1nc(Nc2cnc(OC)cc2)ccc1
0.131627	O=C(OC)C1=CN=C(Br)C=C1	B42	COC1=NC=C(N)C=C1	A35	O=C(OC)c1cnc(Nc2cnc(OC)cc2)cc1
0.0626378	CC1=CC(Br)=CC(C)=N1	B43	COC1=NC=C(N)C=C1	A35	O(C)c1ncc(Nc2cc(C)nc(C)c2)cc1
0.293036	FC(C1=CC(Br)=NC=C1)(F)F	B44	COC1=NC=C(N)C=C1	A35	FC(F)(F)c1cc(Nc2cnc(OC)cc2)ncc1
0.207905	FC(C1=NC=C(Br)C=C1)(F)F	B45	COC1=NC=C(N)C=C1	A35	FC(F)(F)c1ncc(Nc2cnc(OC)cc2)cc1
0.222692	FC(C1=NC=CC(Br)=C1)(F)F	B46	COC1=NC=C(N)C=C1	A35	FC(F)(F)c1nccc(Nc2cnc(OC)cc2)c1
0.118447	FC(C1=NC=CC=C1Br)(F)F	B47	COC1=NC=C(N)C=C1	A35	FC(F)(F)c1c(Nc2cnc(OC)cc2)cccn1
0.159349	O=C(OCC)C1=NC=CC(Br)=C1	B48	COC1=NC=C(N)C=C1	A35	O=C(OCC)c1nccc(Nc2cnc(OC)cc2)c1
0.252198	CC1=CC(Br)=CC(C)=N1	B43	N#CCC1=NC=CC=C1N	A36	N#CCc1c(Nc2cc(C)nc(C)c2)cccn1
0.167984	FC(C1=NC=CC=C1Br)(F)F	B47	N#CCC1=NC=CC=C1N	A36	FC(F)(F)c1c(Nc2c(CC#N)nccc2)cccn1
0.069289	CC1=CC(Br)=CC(C)=N1	B43	O=C(C1=CC=CN=C1N)C	A37	O=C(C)c1c(Nc2cc(C)nc(C)c2)nccc1
0.116624	FC(C1=CC(Br)=NC=C1)(F)F	B44	O=C(C1=CC=CN=C1N)C	A37	FC(F)(F)c1cc(Nc2c(C(=O)C)cccn2)ncc1
0.0231076	FC(C1=NC=CC(Br)=C1)(F)F	B46	O=C(C1=CC=CN=C1N)C	A37	FC(F)(F)c1nccc(Nc2c(C(=O)C)cccn2)c1
0.0456063	FC(C1=NC=CC=C1Br)(F)F	B47	O=C(C1=CC=CN=C1N)C	A37	FC(F)(F)c1c(Nc2c(C(=O)C)cccn2)cccn1
0.208306	FC(C1=CC=CC(Br)=N1)F	B41	CCOC1=NC=CC(N)=C1	A38	FC(F)c1nc(Nc2cc(OCC)ncc2)ccc1
0.12931	O=C(OC)C1=CN=C(Br)C=C1	B42	CCOC1=NC=CC(N)=C1	A38	O=C(OC)c1cnc(Nc2cc(OCC)ncc2)cc1
0.0850184	CC1=CC(Br)=CC(C)=N1	B43	CCOC1=NC=CC(N)=C1	A38	O(CC)c1nccc(Nc2cc(C)nc(C)c2)c1
0.185247	FC(C1=CC(Br)=NC=C1)(F)F	B44	CCOC1=NC=CC(N)=C1	A38	FC(F)(F)c1cc(Nc2cc(OCC)ncc2)ncc1
0.178077	FC(C1=NC=C(Br)C=C1)(F)F	B45	CCOC1=NC=CC(N)=C1	A38	FC(F)(F)c1ncc(Nc2cc(OCC)ncc2)cc1
0.0882232	FC(C1=NC=CC(Br)=C1)(F)F	B46	CCOC1=NC=CC(N)=C1	A38	FC(F)(F)c1nccc(Nc2cc(OCC)ncc2)c1
0.194938	FC(C1=NC=CC=C1Br)(F)F	B47	CCOC1=NC=CC(N)=C1	A38	FC(F)(F)c1c(Nc2cc(OCC)ncc2)cccn1
0.202188	O=C(OCC)C1=NC=CC(Br)=C1	B48	CCOC1=NC=CC(N)=C1	A38	O=C(OCC)c1nccc(Nc2cc(OCC)ncc2)c1
0.392505	FC(C1=CC=CC(Br)=N1)F	B41	CCOC1=CC(N)=NC=C1	A39	FC(F)c1nc(Nc2nccc(OCC)c2)ccc1
0.314931	O=C(OC)C1=CN=C(Br)C=C1	B42	CCOC1=CC(N)=NC=C1	A39	O=C(OC)c1cnc(Nc2nccc(OCC)c2)cc1
0.147812	CC1=CC(Br)=CC(C)=N1	B43	CCOC1=CC(N)=NC=C1	A39	O(CC)c1cc(Nc2cc(C)nc(C)c2)ncc1
0.121906	FC(C1=NC=C(Br)C=C1)(F)F	B45	CCOC1=CC(N)=NC=C1	A39	FC(F)(F)c1ncc(Nc2nccc(OCC)c2)cc1
0.0917804	FC(C1=NC=CC(Br)=C1)(F)F	B46	CCOC1=CC(N)=NC=C1	A39	FC(F)(F)c1nccc(Nc2nccc(OCC)c2)c1
0.0785426	FC(C1=NC=CC=C1Br)(F)F	B47	CCOC1=CC(N)=NC=C1	A39	FC(F)(F)c1c(Nc2nccc(OCC)c2)cccn1
0.17121	O=C(OCC)C1=NC=CC(Br)=C1	B48	CCOC1=CC(N)=NC=C1	A39	O=C(OCC)c1nccc(Nc2nccc(OCC)c2)c1
0.128694	FC(C1=CC=CC(Br)=N1)F	B41	O=[N+](C1=CN=C(N)C=C1)[O-]	A40	FC(F)c1nc(Nc2ncc([N+](=O)[O-])cc2)ccc1
0.180732	O=C(OC)C1=CN=C(Br)C=C1	B42	O=[N+](C1=CN=C(N)C=C1)[O-]	A40	O=[N+]([O-])c1cnc(Nc2ncc(C(=O)OC)cc2)cc1
0.162153	CC1=CC(Br)=CC(C)=N1	B43	O=[N+](C1=CN=C(N)C=C1)[O-]	A40	O=[N+]([O-])c1cnc(Nc2cc(C)nc(C)c2)cc1
0.154971	FC(C1=CC(Br)=NC=C1)(F)F	B44	O=[N+](C1=CN=C(N)C=C1)[O-]	A40	FC(F)(F)c1cc(Nc2ncc([N+](=O)[O-])cc2)ncc1
0.242402	FC(C1=NC=CC(Br)=C1)(F)F	B46	O=[N+](C1=CN=C(N)C=C1)[O-]	A40	FC(F)(F)c1nccc(Nc2ncc([N+](=O)[O-])cc2)c1
0.0880856	FC(C1=NC=CC=C1Br)(F)F	B47	O=[N+](C1=CN=C(N)C=C1)[O-]	A40	FC(F)(F)c1c(Nc2ncc([N+](=O)[O-])cc2)cccn1
0.175859	O=C(OCC)C1=NC=CC(Br)=C1	B48	O=[N+](C1=CN=C(N)C=C1)[O-]	A40	O=[N+]([O-])c1cnc(Nc2cc(C(=O)OCC)ncc2)cc1
0.200881	FC(C1=CC=CC(Br)=N1)F	B41	O=C(OC)C1=CC=NC=C1N	A41	FC(F)c1nc(Nc2c(C(=O)OC)ccnc2)ccc1
0.165508	CC1=CC(Br)=CC(C)=N1	B43	O=C(OC)C1=CC=NC=C1N	A41	O=C(OC)c1c(Nc2cc(C)nc(C)c2)cncc1
0.0481811	FC(C1=NC=C(Br)C=C1)(F)F	B45	O=C(OC)C1=CC=NC=C1N	A41	FC(F)(F)c1ncc(Nc2c(C(=O)OC)ccnc2)cc1
0.00760278	FC(C1=NC=CC(Br)=C1)(F)F	B46	O=C(OC)C1=CC=NC=C1N	A41	FC(F)(F)c1nccc(Nc2c(C(=O)OC)ccnc2)c1
0.00468485	FC(C1=NC=CC=C1Br)(F)F	B47	O=C(OC)C1=CC=NC=C1N	A41	FC(F)(F)c1c(Nc2c(C(=O)OC)ccnc2)cccn1
0.0514123	O=C(OCC)C1=NC=CC(Br)=C1	B48	O=C(OC)C1=CC=NC=C1N	A41	O=C(OC)c1c(Nc2cc(C(=O)OCC)ncc2)cncc1
0.0945456	FC(C1=CC=CC(Br)=N1)F	B41	O=C(C1=C(N)C=CN=C1)OC	A42	FC(F)c1nc(Nc2c(C(=O)OC)cncc2)ccc1
0.158877	CC1=CC(Br)=CC(C)=N1	B43	O=C(C1=C(N)C=CN=C1)OC	A42	O=C(OC)c1c(Nc2cc(C)nc(C)c2)ccnc1
0.0149977	FC(C1=CC(Br)=NC=C1)(F)F	B44	O=C(C1=C(N)C=CN=C1)OC	A42	FC(F)(F)c1cc(Nc2c(C(=O)OC)cncc2)ncc1
0.080789	FC(C1=NC=C(Br)C=C1)(F)F	B45	O=C(C1=C(N)C=CN=C1)OC	A42	FC(F)(F)c1ncc(Nc2c(C(=O)OC)cncc2)cc1
0.0182804	FC(C1=NC=CC(Br)=C1)(F)F	B46	O=C(C1=C(N)C=CN=C1)OC	A42	FC(F)(F)c1nccc(Nc2c(C(=O)OC)cncc2)c1
0.0625104	FC(C1=NC=CC=C1Br)(F)F	B47	O=C(C1=C(N)C=CN=C1)OC	A42	FC(F)(F)c1c(Nc2c(C(=O)OC)cncc2)cccn1
0.230977	FC(C1=CC=CC(Br)=N1)F	B41	O=C(C1=NC=CC(N)=C1)OC	A43	FC(F)c1nc(Nc2cc(C(=O)OC)ncc2)ccc1
0.050982	O=C(OC)C1=CN=C(Br)C=C1	B42	O=C(C1=NC=CC(N)=C1)OC	A43	O=C(OC)c1nccc(Nc2ncc(C(=O)OC)cc2)c1
0.257728	CC1=CC(Br)=CC(C)=N1	B43	O=C(C1=NC=CC(N)=C1)OC	A43	O=C(OC)c1nccc(Nc2cc(C)nc(C)c2)c1
0.0554413	FC(C1=CC(Br)=NC=C1)(F)F	B44	O=C(C1=NC=CC(N)=C1)OC	A43	FC(F)(F)c1cc(Nc2cc(C(=O)OC)ncc2)ncc1
0.0220443	FC(C1=NC=C(Br)C=C1)(F)F	B45	O=C(C1=NC=CC(N)=C1)OC	A43	FC(F)(F)c1ncc(Nc2cc(C(=O)OC)ncc2)cc1
0.078414	FC(C1=NC=CC(Br)=C1)(F)F	B46	O=C(C1=NC=CC(N)=C1)OC	A43	FC(F)(F)c1nccc(Nc2cc(C(=O)OC)ncc2)c1
0.0609571	FC(C1=NC=CC=C1Br)(F)F	B47	O=C(C1=NC=CC(N)=C1)OC	A43	FC(F)(F)c1c(Nc2cc(C(=O)OC)ncc2)cccn1
0.145719	O=C(OCC)C1=NC=CC(Br)=C1	B48	O=C(C1=NC=CC(N)=C1)OC	A43	O=C(OCC)c1nccc(Nc2cc(C(=O)OC)ncc2)c1
0.525639	FC(C1=CC=CC(Br)=N1)F	B41	O=C(OC)C1=CC=NC(N)=C1	A44	FC(F)c1nc(Nc2nccc(C(=O)OC)c2)ccc1
0.195856	O=C(OC)C1=CN=C(Br)C=C1	B42	O=C(OC)C1=CC=NC(N)=C1	A44	O=C(OC)c1cc(Nc2ncc(C(=O)OC)cc2)ncc1
0.0956471	CC1=CC(Br)=CC(C)=N1	B43	O=C(OC)C1=CC=NC(N)=C1	A44	O=C(OC)c1cc(Nc2cc(C)nc(C)c2)ncc1
0.407211	FC(C1=CC(Br)=NC=C1)(F)F	B44	O=C(OC)C1=CC=NC(N)=C1	A44	FC(F)(F)c1cc(Nc2nccc(C(=O)OC)c2)ncc1
0.0687449	FC(C1=NC=CC=C1Br)(F)F	B47	O=C(OC)C1=CC=NC(N)=C1	A44	FC(F)(F)c1c(Nc2nccc(C(=O)OC)c2)cccn1
0.0595982	O=C(OCC)C1=NC=CC(Br)=C1	B48	O=C(OC)C1=CC=NC(N)=C1	A44	O=C(OCC)c1nccc(Nc2nccc(C(=O)OC)c2)c1
0.254421	FC(C1=CC=CC(Br)=N1)F	B41	NC1=NC=C(C(F)(F)F)C=C1	A45	FC(F)(F)c1cnc(Nc2nc(C(F)F)ccc2)cc1
0.129692	O=C(OC)C1=CN=C(Br)C=C1	B42	NC1=NC=C(C(F)(F)F)C=C1	A45	FC(F)(F)c1cnc(Nc2ncc(C(=O)OC)cc2)cc1
0.133076	CC1=CC(Br)=CC(C)=N1	B43	NC1=NC=C(C(F)(F)F)C=C1	A45	FC(F)(F)c1cnc(Nc2cc(C)nc(C)c2)cc1
0.270864	FC(C1=CC(Br)=NC=C1)(F)F	B44	NC1=NC=C(C(F)(F)F)C=C1	A45	FC(F)(F)c1cc(Nc2ncc(C(F)(F)F)cc2)ncc1
0.0577444	FC(C1=NC=C(Br)C=C1)(F)F	B45	NC1=NC=C(C(F)(F)F)C=C1	A45	FC(F)(F)c1ncc(Nc2ncc(C(F)(F)F)cc2)cc1
0.0429336	FC(C1=NC=CC(Br)=C1)(F)F	B46	NC1=NC=C(C(F)(F)F)C=C1	A45	FC(F)(F)c1nccc(Nc2ncc(C(F)(F)F)cc2)c1
0.0735611	O=C(OCC)C1=NC=CC(Br)=C1	B48	NC1=NC=C(C(F)(F)F)C=C1	A45	FC(F)(F)c1cnc(Nc2cc(C(=O)OCC)ncc2)cc1
0.192763	CC1=CC(Br)=CC(C)=N1	B43	FC(C1=NC=C(N)C=C1)(F)F	A46	FC(F)(F)c1ncc(Nc2cc(C)nc(C)c2)cc1
0.12479	FC(C1=NC=CC(Br)=C1)(F)F	B46	FC(C1=NC=C(N)C=C1)(F)F	A46	FC(F)(F)c1nccc(Nc2cnc(C(F)(F)F)cc2)c1
0.142184	FC(C1=NC=CC=C1Br)(F)F	B47	FC(C1=NC=C(N)C=C1)(F)F	A46	FC(F)(F)c1c(Nc2cnc(C(F)(F)F)cc2)cccn1
0.169616	O=C(OCC)C1=NC=CC(Br)=C1	B48	FC(C1=NC=C(N)C=C1)(F)F	A46	FC(F)(F)c1ncc(Nc2cc(C(=O)OCC)ncc2)cc1
0.288849	FC(C1=CC=CC(Br)=N1)F	B41	FC(C1=NC=CC(N)=C1)(F)F	A47	FC(F)(F)c1nccc(Nc2nc(C(F)F)ccc2)c1
0.0149344	O=C(OC)C1=CN=C(Br)C=C1	B42	FC(C1=NC=CC(N)=C1)(F)F	A47	FC(F)(F)c1nccc(Nc2ncc(C(=O)OC)cc2)c1
0.368866	CC1=CC(Br)=CC(C)=N1	B43	FC(C1=NC=CC(N)=C1)(F)F	A47	FC(F)(F)c1nccc(Nc2cc(C)nc(C)c2)c1
0.125493	FC(C1=CC(Br)=NC=C1)(F)F	B44	FC(C1=NC=CC(N)=C1)(F)F	A47	FC(F)(F)c1nccc(Nc2nccc(C(F)(F)F)c2)c1
0.140238	FC(C1=NC=C(Br)C=C1)(F)F	B45	FC(C1=NC=CC(N)=C1)(F)F	A47	FC(F)(F)c1nccc(Nc2cnc(C(F)(F)F)cc2)c1
0.0729816	FC(C1=NC=CC(Br)=C1)(F)F	B46	FC(C1=NC=CC(N)=C1)(F)F	A47	FC(F)(F)c1nccc(Nc2cc(C(F)(F)F)ncc2)c1
0.158929	FC(C1=NC=CC=C1Br)(F)F	B47	FC(C1=NC=CC(N)=C1)(F)F	A47	FC(F)(F)c1c(Nc2cc(C(F)(F)F)ncc2)cccn1
0.178925	O=C(OCC)C1=NC=CC(Br)=C1	B48	FC(C1=NC=CC(N)=C1)(F)F	A47	FC(F)(F)c1nccc(Nc2cc(C(=O)OCC)ncc2)c1
0.304234	FC(C1=CC=CC(Br)=N1)F	B41	O=C(OCC)C1=NC=CC(N)=C1	A48	FC(F)c1nc(Nc2cc(C(=O)OCC)ncc2)ccc1
0.036279	O=C(OC)C1=CN=C(Br)C=C1	B42	O=C(OCC)C1=NC=CC(N)=C1	A48	O=C(OCC)c1nccc(Nc2ncc(C(=O)OC)cc2)c1
0.349757	CC1=CC(Br)=CC(C)=N1	B43	O=C(OCC)C1=NC=CC(N)=C1	A48	O=C(OCC)c1nccc(Nc2cc(C)nc(C)c2)c1
0.024294	FC(C1=CC(Br)=NC=C1)(F)F	B44	O=C(OCC)C1=NC=CC(N)=C1	A48	FC(F)(F)c1cc(Nc2cc(C(=O)OCC)ncc2)ncc1
0.134174	FC(C1=NC=C(Br)C=C1)(F)F	B45	O=C(OCC)C1=NC=CC(N)=C1	A48	FC(F)(F)c1ncc(Nc2cc(C(=O)OCC)ncc2)cc1
0.0746213	FC(C1=NC=CC(Br)=C1)(F)F	B46	O=C(OCC)C1=NC=CC(N)=C1	A48	FC(F)(F)c1nccc(Nc2cc(C(=O)OCC)ncc2)c1
0.0209072	FC(C1=NC=CC=C1Br)(F)F	B47	O=C(OCC)C1=NC=CC(N)=C1	A48	FC(F)(F)c1c(Nc2cc(C(=O)OCC)ncc2)cccn1
0.206458	O=C(OCC)C1=NC=CC(Br)=C1	B48	O=C(OCC)C1=NC=CC(N)=C1	A48	O=C(OCC)c1nccc(Nc2cc(C(=O)OCC)ncc2)c1
